# Supplementary material for: New Diterpenoids from Mesona procumbens with Antiproliferative Activities Modulate Cell Cycle Arrest and Apoptosis in Human Leukemia Cancer Cells
Source: MDPI journal article supplement (doi:10.3390/ph14111108), 2021-10-29
Supplement: s1 [file s1]

## Supplementary data

### Content

**Figure S1.**  $^1\text{H}$ -NMR spectrum of mesonol A (**1**) in  $\text{MeOD-}d_4$  (600 MHz)

**Figure S2.**  $^{13}\text{C}$ -NMR spectrum of mesonol A (**1**) in  $\text{MeOD-}d_4$  (150 MHz)

**Figure S3.** COSY spectrum of mesonol A (**1**)

**Figure S4.** HSQC spectrum of mesonol A (**1**)

**Figure S5.** HMBC spectrum of mesonol A (**1**)

**Figure S6.** NOESY spectrum of mesonol A (**1**)

**Figure S7.** (+)-HRESIMS spectrum of mesonol A (**1**)

**Figure S8.**  $^1\text{H}$ -NMR spectrum of mesonol B (**2**) in  $\text{MeOD-}d_4$  (500 MHz)

**Figure S9.**  $^{13}\text{C}$ -NMR spectrum of mesonol B (**2**) in  $\text{MeOD-}d_4$  (125 MHz)

**Figure S10.** COSY spectrum of mesonol B (**2**)

**Figure S11.** HSQC spectrum of mesonol B (**2**)

**Figure S12.** HMBC spectrum of mesonol B (**2**)

**Figure S13.** NOESY spectrum of mesonol B (**2**)

**Figure S14.** (+)-HRESIMS spectrum of mesonol B (**2**)

**Figure S15.**  $^1\text{H}$ -NMR spectrum of mesonol C (**3**) in  $\text{MeOD-}d_4$  (500 MHz)

**Figure S16.**  $^{13}\text{C}$ -NMR spectrum of mesonol C (**3**) in  $\text{MeOD-}d_4$  (125 MHz)

**Figure S17.** COSY spectrum of mesonol C (**3**)

**Figure S18.** HSQC spectrum of mesonol C (**3**)

**Figure S19.** HMBC spectrum of mesonol C (**3**)

**Figure S20.** NOESY spectrum of mesonol C (**3**)

**Figure S21.** (+)-HRESIMS spectrum of mesonol C (**3**)

**Figure S22.**  $^1\text{H}$ -NMR spectrum of mesonol D (**4**) in  $\text{MeOD-}d_4$  (500 MHz)

**Figure S23.**  $^{13}\text{C}$ -NMR spectrum of mesonol D (**4**) in  $\text{MeOD-}d_4$  (125 MHz)

**Figure S24.** COSY spectrum of mesonol D (**4**)

**Figure S25.** HSQC spectrum of mesonol D (**4**)

**Figure S26.** HMBC spectrum of mesonol D (**4**)

**Figure S27.** NOESY spectrum of mesonol D (**4**)

**Figure S28.** (+)-HRESIMS spectrum of mesonol D (**4**)

**Figure S29.**  $^1\text{H}$ -NMR spectrum of mesonol E (**5**) in  $\text{MeOD-}d_4$  (500 MHz)

**Figure S30.**  $^{13}\text{C}$ -NMR spectrum of mesonol E (**5**) in  $\text{MeOD-}d_4$  (125 MHz)

**Figure S31.** COSY spectrum of mesonol E (**5**)

**Figure S32.** HSQC spectrum of mesonol E (**5**)

**Figure S33.** HMBC spectrum of mesonol E (**5**)

**Figure S34.** NOESY spectrum of mesonol E (**5**)

**Figure S35.** (–)-HRESIMS spectrum of mesonol E (**5**)

**Figure S36.**  $^1\text{H}$ -NMR spectrum of mesonol F (**6**) in  $\text{MeOD-}d_4$  (500 MHz)

**Figure S37.**  $^{13}\text{C}$ -NMR spectrum of mesonol F (**6**) in  $\text{MeOD-}d_4$  (125 MHz)

**Figure S38.** COSY spectrum of mesonol F (**6**)

**Figure S39.** HSQC spectrum of mesonol F (**6**)

**Figure S40.** HMBC spectrum of mesonol F (**6**)

**Figure S41.** NOESY spectrum of mesonol F (**6**)

**Figure S42.** (+)-HRESIMS spectrum of mesonol F (**6**)

**Figure S43.**  $^1\text{H}$ -NMR spectrum of mesonol G (**7**) in  $\text{MeOD-}d_4$  (600 MHz)

**Figure S44.**  $^{13}\text{C}$ -NMR spectrum of mesonol G (**7**) in  $\text{MeOD-}d_4$  (150 MHz)

**Figure S45.** COSY spectrum of mesonol G (**7**)

**Figure S46.** HSQC spectrum of mesonol G (**7**)

**Figure S47.** HMBC spectrum of mesonol G (**7**)

**Figure S48.** NOESY spectrum of mesonol G (**7**)

**Figure S49.** (+)-HRESIMS spectrum of mesonol G (**7**)

**Figure S50.**  $^1\text{H}$ -NMR spectrum of mesonol H (**8**) in MeOD-*d*<sub>4</sub> (600 MHz)

**Figure S51.**  $^{13}\text{C}$ -NMR spectrum of mesonol H (**8**) in MeOD-*d*<sub>4</sub> (150 MHz)

**Figure S52.** COSY spectrum of mesonol H (**8**)

**Figure S53.** HSQC spectrum of mesonol H (**8**)

**Figure S54.** HMBC spectrum of mesonol H (**8**)

**Figure S55.** NOESY spectrum of mesonol H (**8**)

**Figure S56.** (+)-HRESIMS spectrum of mesonol H (**8**)

**Figure S57.**  $^1\text{H}$ -NMR spectrum of mesonol I (**9**) in MeOD-*d*<sub>4</sub> (500 MHz)

**Figure S58.**  $^{13}\text{C}$ -NMR spectrum of mesonol I (**9**) in MeOD-*d*<sub>4</sub> (125 MHz)

**Figure S59.** COSY spectrum of mesonol I (**9**)

**Figure S60.** HSQC spectrum of mesonol I (**9**)

**Figure S61.** HMBC spectrum of mesonol I (**9**)

**Figure S62.** (–)-HRESIMS spectrum of mesonol I (**9**)

**Figure S63.**  $^1\text{H}$ -NMR spectrum of mesonol J (**10**) in MeOD-*d*<sub>4</sub> (500 MHz)

**Figure S64.**  $^{13}\text{C}$ -NMR spectrum of mesonol J (**10**) in MeOD-*d*<sub>4</sub> (125 MHz)

**Figure S65.** COSY spectrum of mesonol J (**10**)

**Figure S66.** HSQC spectrum of mesonol J (**10**)

**Figure S67.** HMBC spectrum of mesonol J (**10**)

**Figure S68.** NOESY spectrum of mesonol J (**10**)

**Figure S69.** (–)-HRESIMS spectrum of mesonol J (**10**)

**Figure S70.** <sup>1</sup>H-NMR spectrum of mesonol K (**11**) in MeOD-*d*<sub>4</sub> (600 MHz)

**Figure S71.** <sup>13</sup>C-NMR spectrum of mesonol K (**11**) in MeOD-*d*<sub>4</sub> (150 MHz)

**Figure S72.** COSY spectrum of mesonol K (**11**)

**Figure S73.** HSQC spectrum of mesonol K (**11**)

**Figure S74.** HMBC spectrum of mesonol K (**11**)

**Figure S75.** NOESY spectrum of mesonol K (**11**)

**Figure S76.** (+)-HRESIMS spectrum of mesonol K (**11**)

**Table S1.** Crystal data and structure refinement for **1** (d23335a, CCDC number: 2088866).

**Table S2.** Crystal data and structure refinement for **2** (d22559, CCDC number: 2088867).

**Table S3.** Crystal data and structure refinement for **3** (d22583, CCDC number: 2088868).

**Table S4.** Crystal data and structure refinement for **3** (d22561, CCDC number: 2088869).

## Supplementary figures

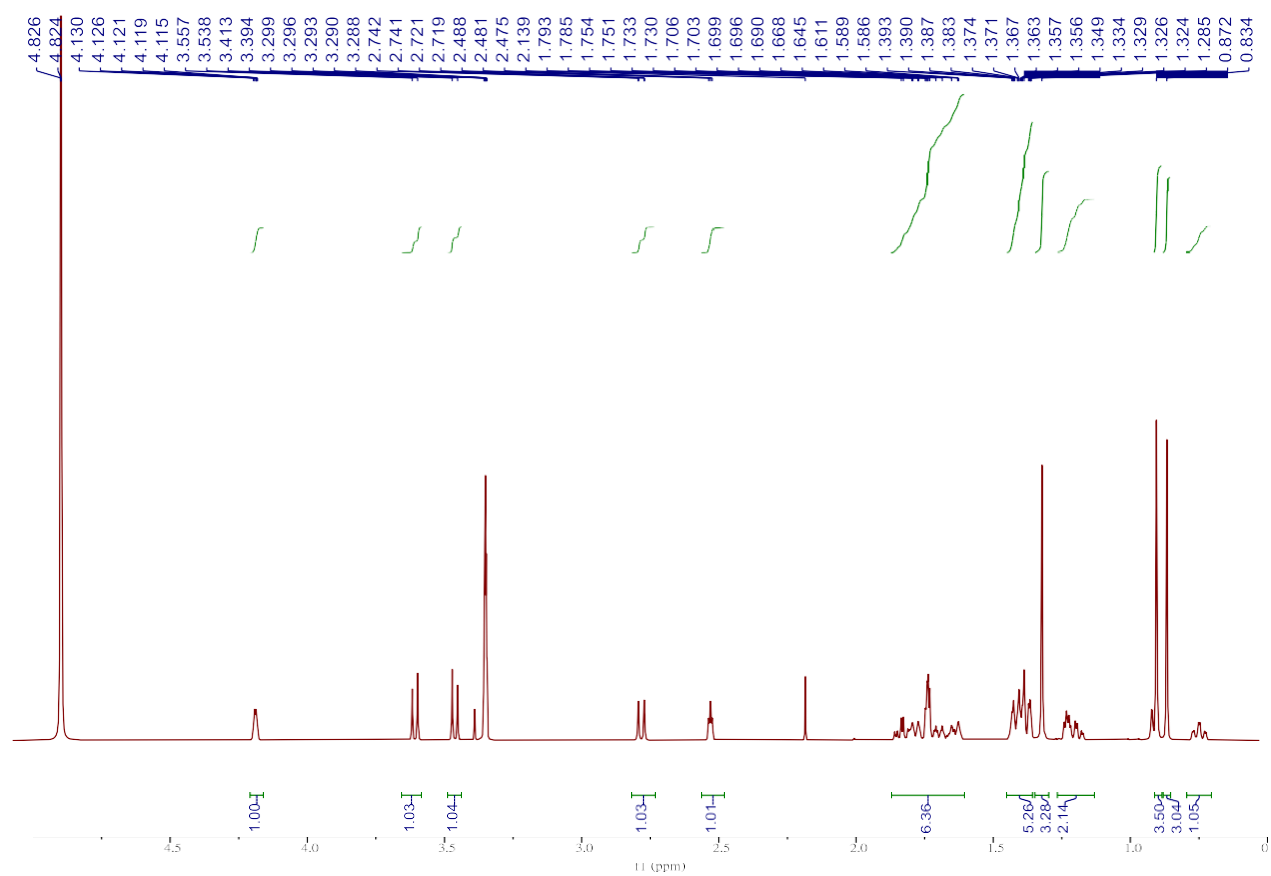

**Figure S1.**  $^1\text{H}$ -NMR spectrum of mesonol A (1) in  $\text{MeOD-}d_4$  (600 MHz)

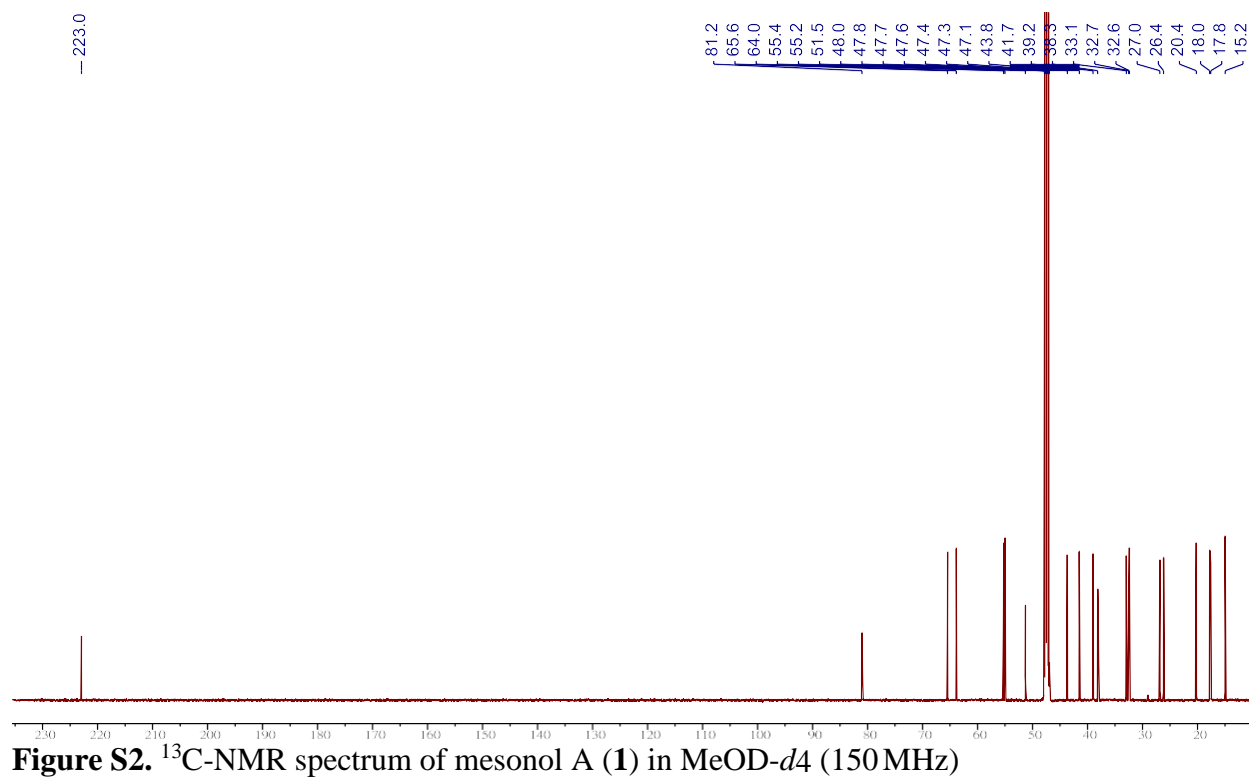

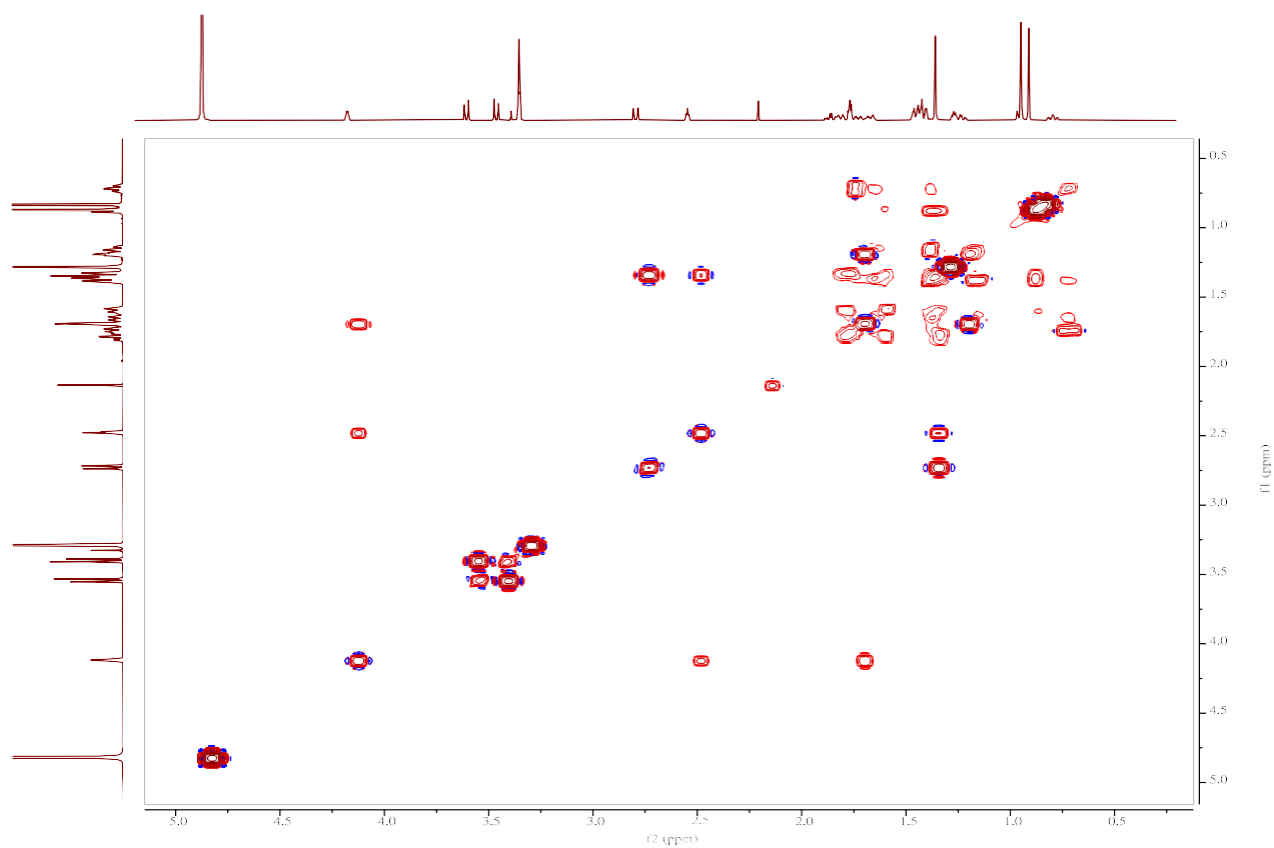

**Figure S3.** COSY spectrum of mesonol A (**1**)

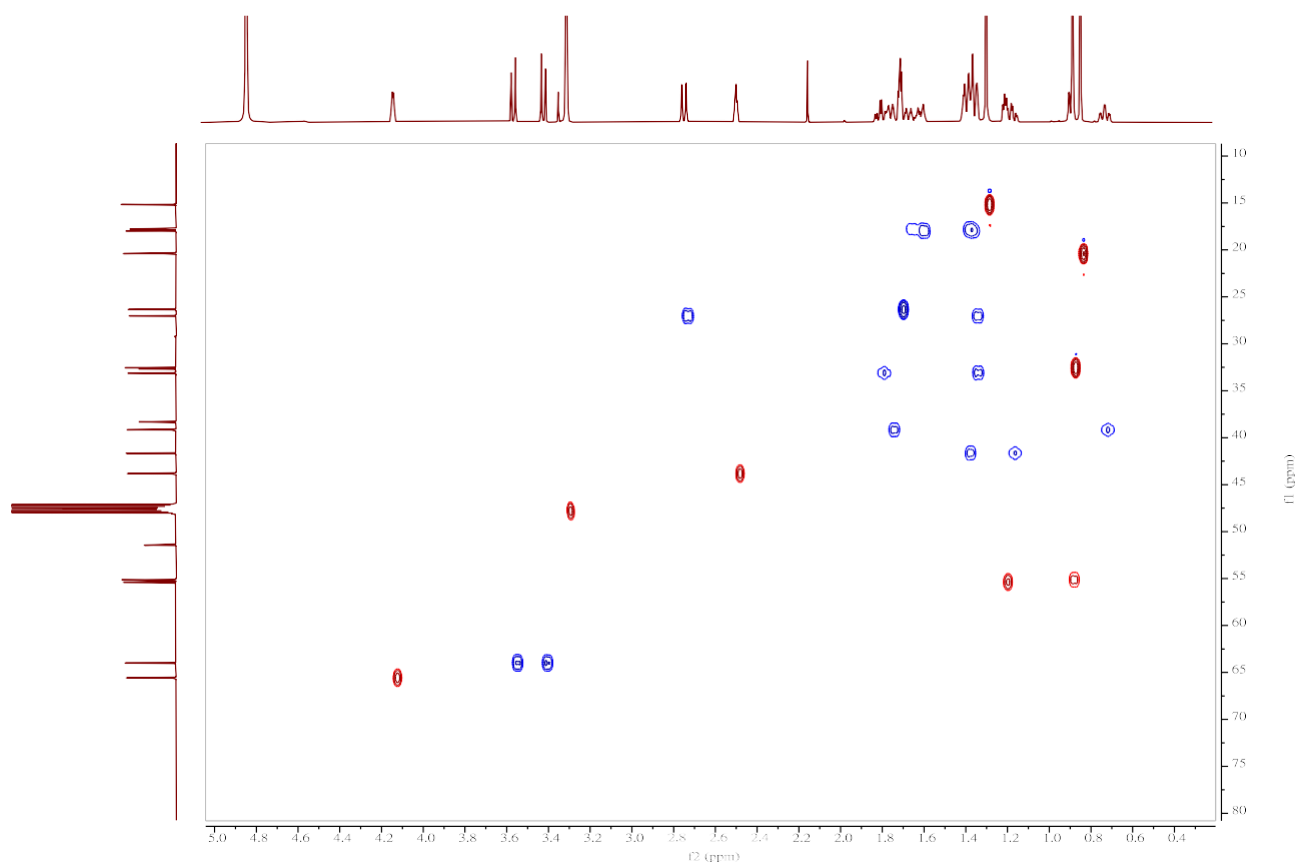

**Figure S4.** HSQC spectrum of mesonol A(**1**)



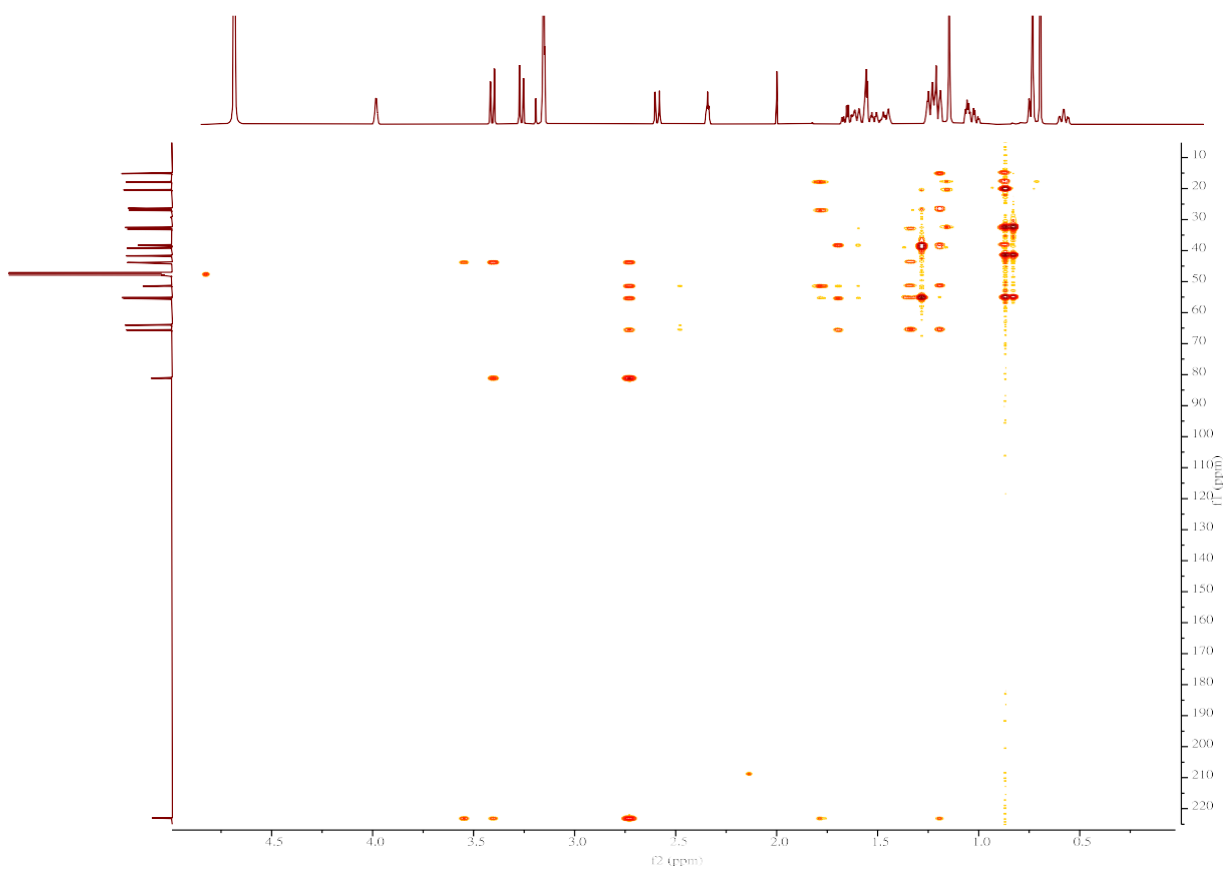

**Figure S5.** HMBC spectrum of mesonol A (**1**)

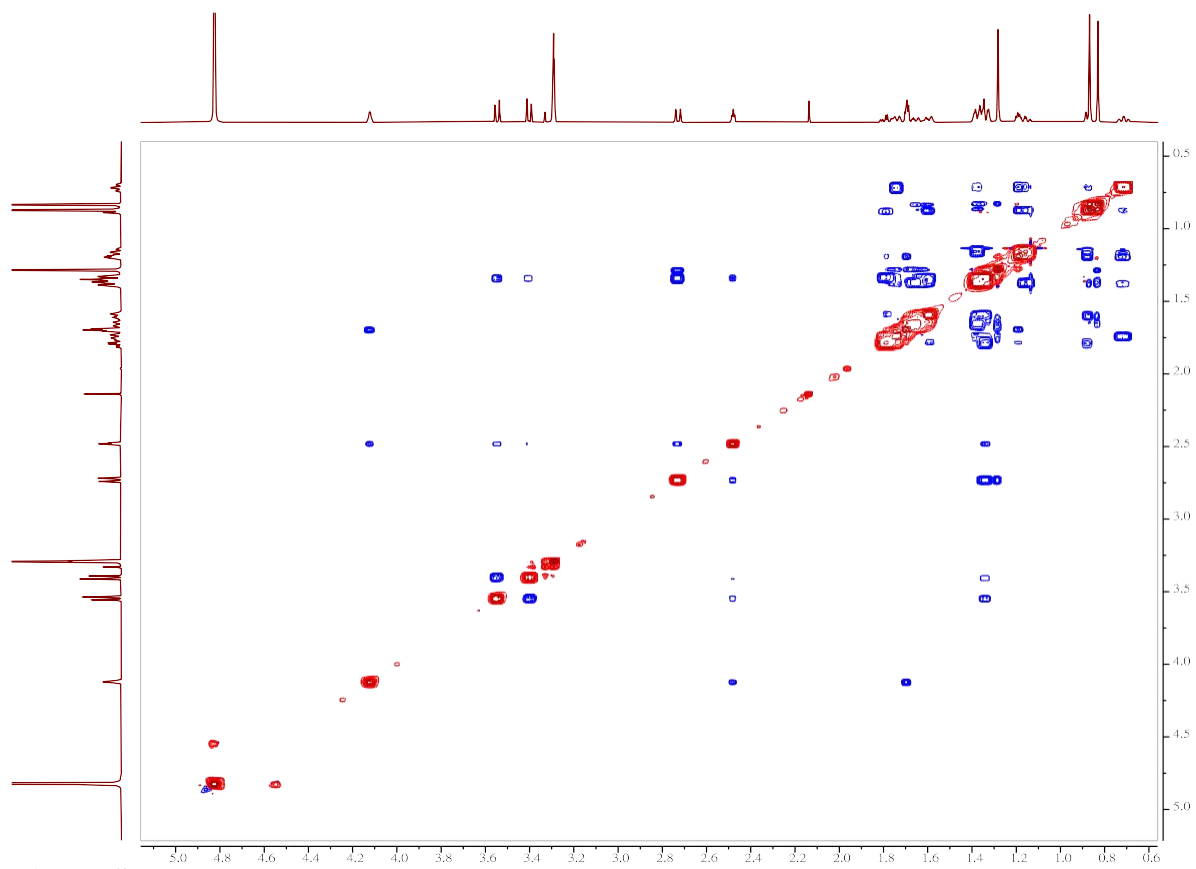

**Figure S6.** NOESY spectrum of mesonol A (**1**)

PPD1862111 #149 RT: 1.45 AV: 1 NL: 5.05E7  
T: FTMS + p ESI Full ms [50.0000-750.0000]

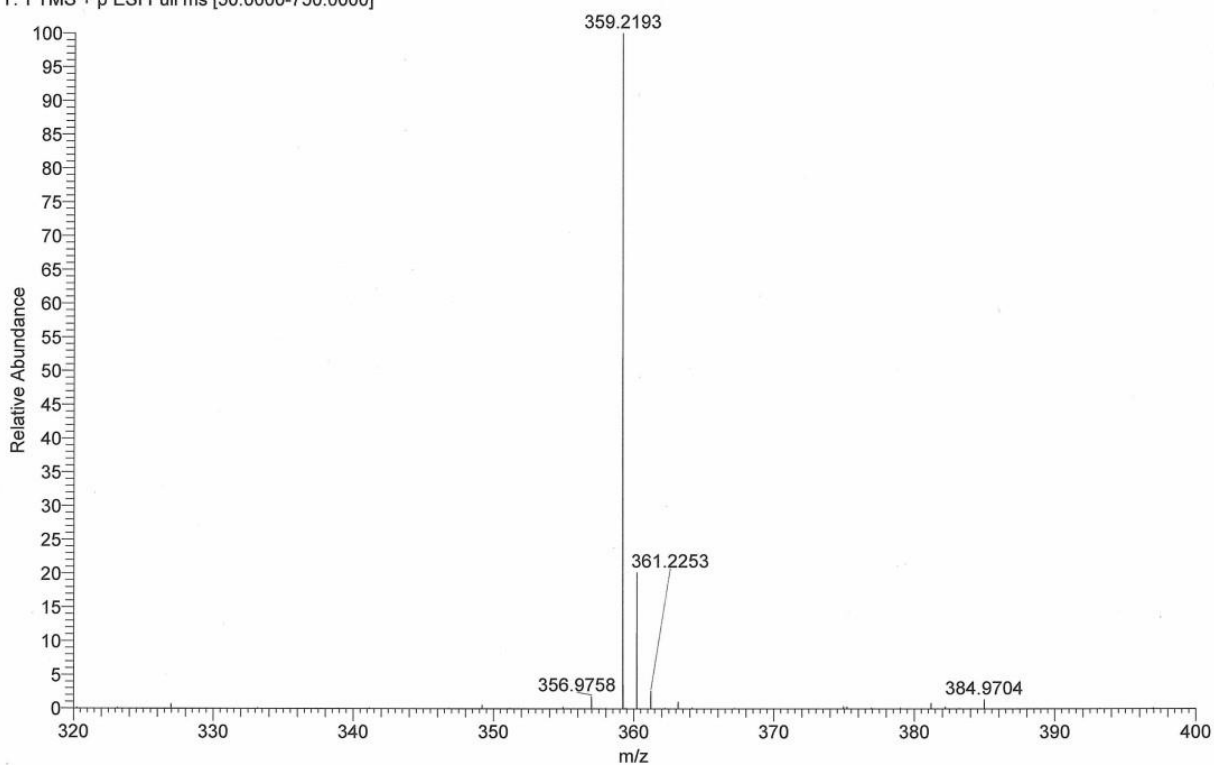

**Figure S7.** (+)-HRESIMS spectrum of mesonol A (**1**)

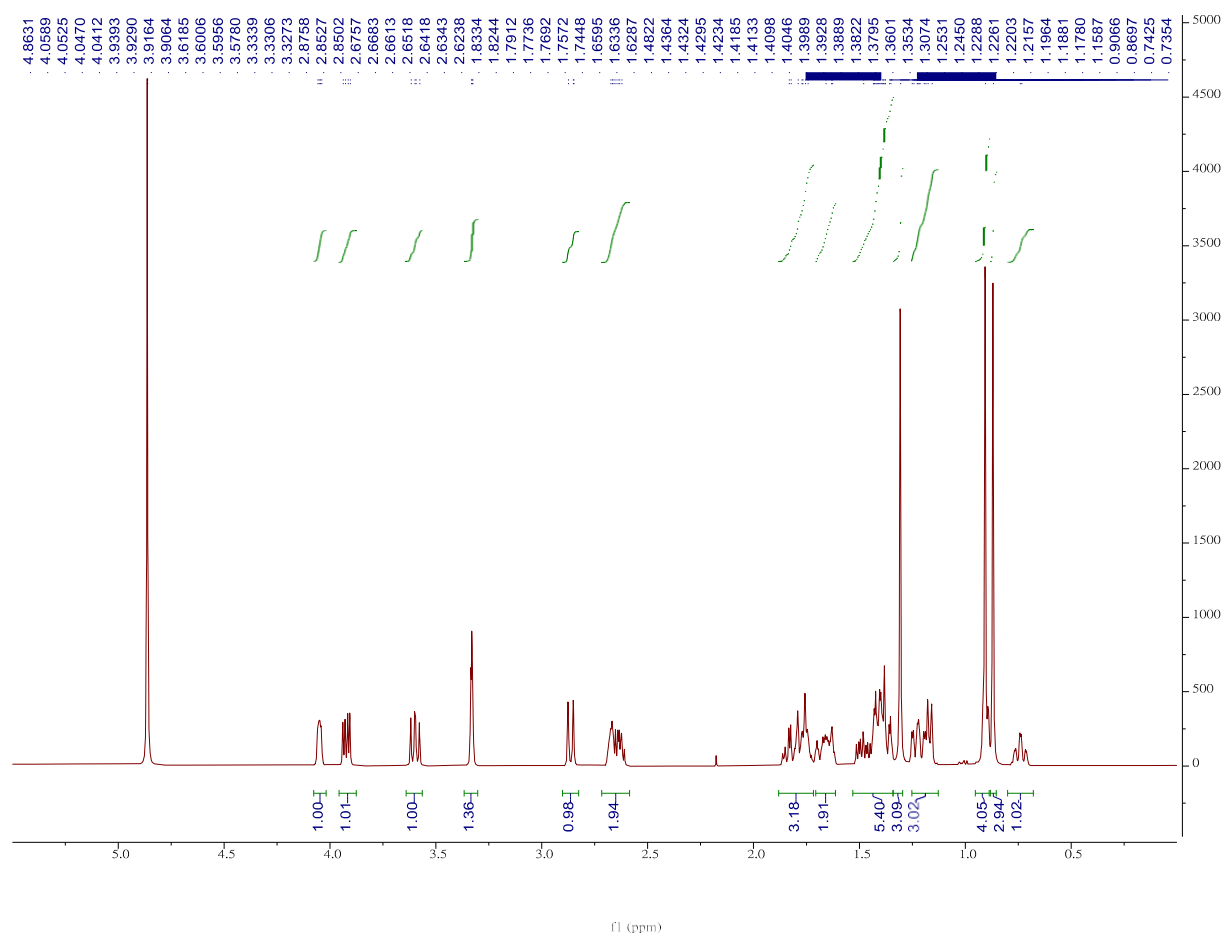

**Figure S8.**  $^1\text{H}$ -NMR spectrum of mesonol B (2) in  $\text{MeOD-}d_4$  (500 MHz)

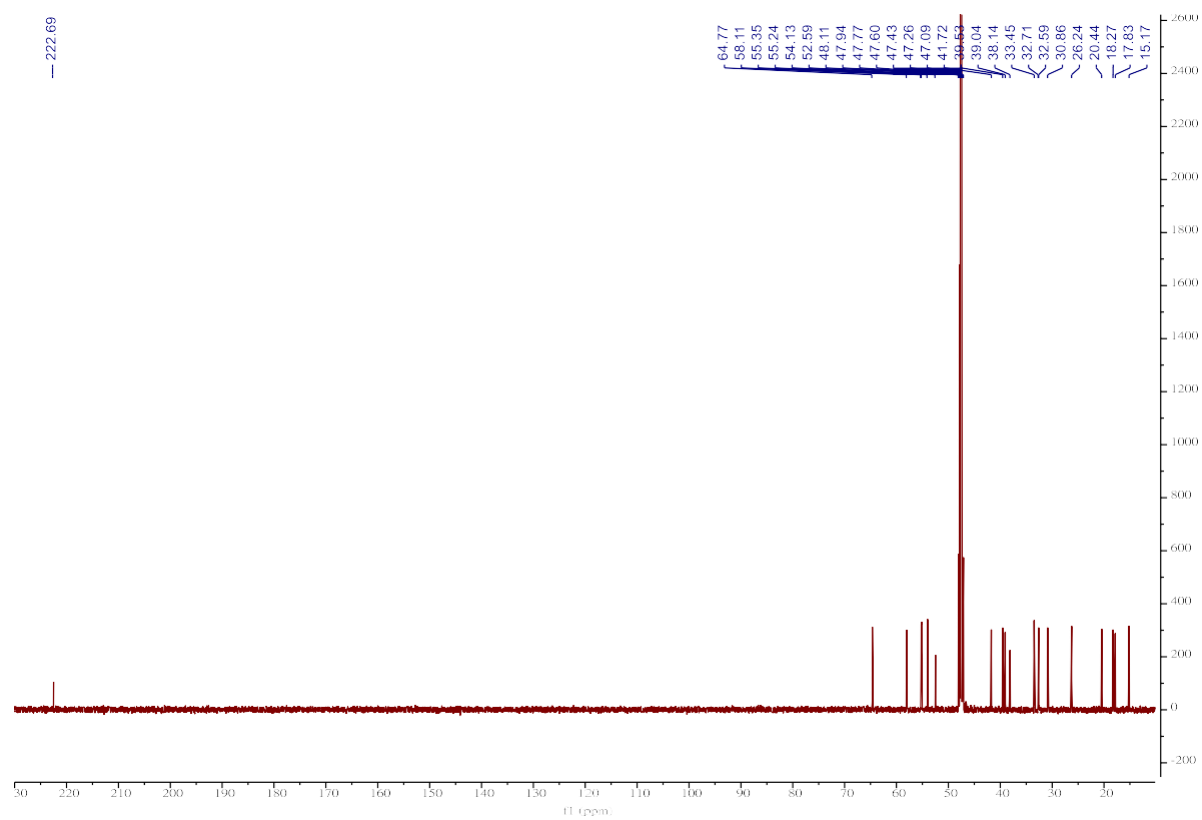

**Figure S9.**  $^{13}\text{C}$ -NMR spectrum of mesonol B (**2**) in  $\text{MeOD-}d_4$  (125 MHz)

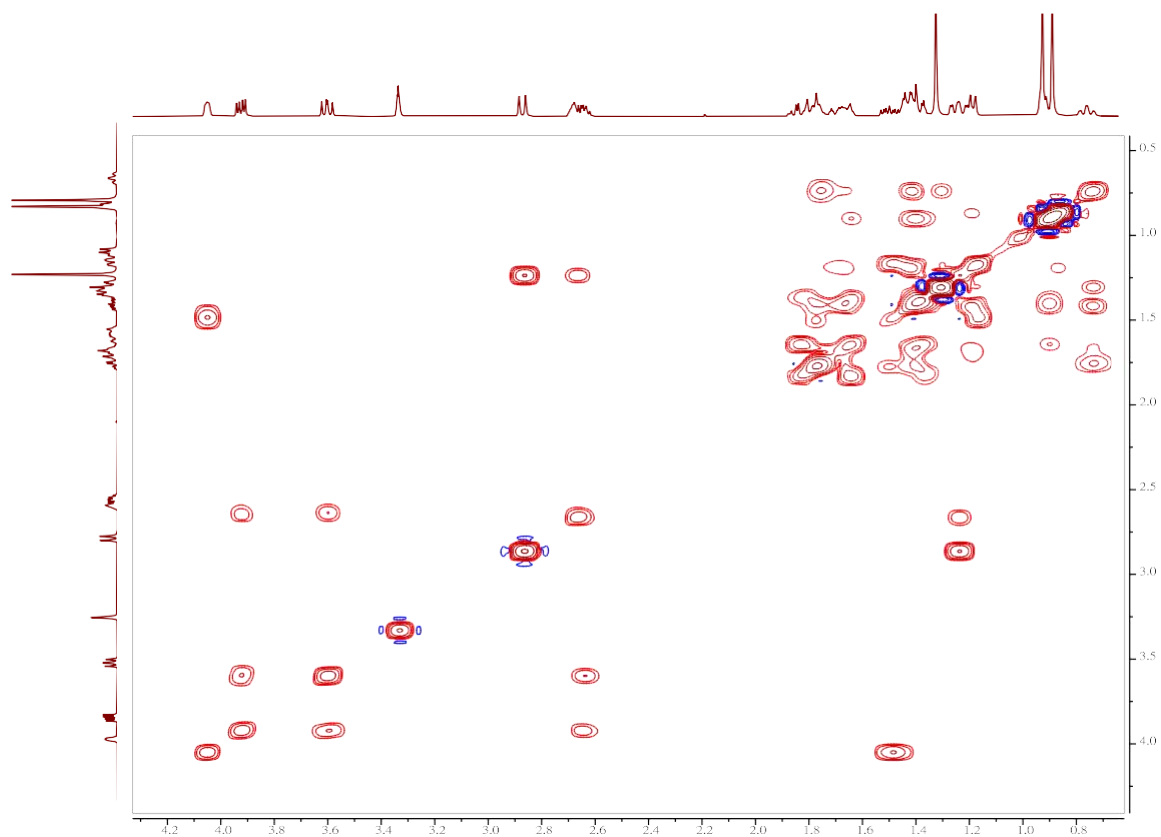

**Figure S10.** COSY spectrum of mesonol B (2)

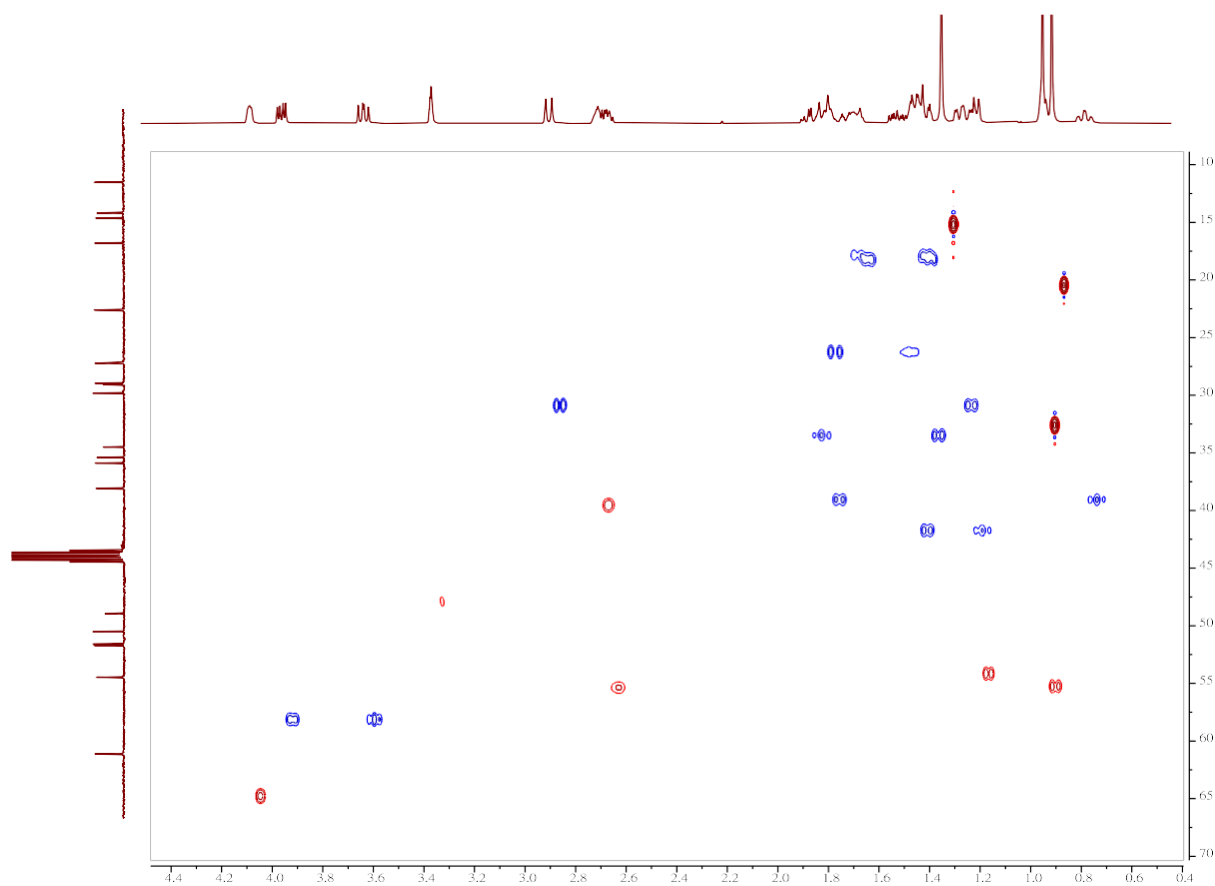

**Figure S11.** HSQC spectrum of mesonol B (2)

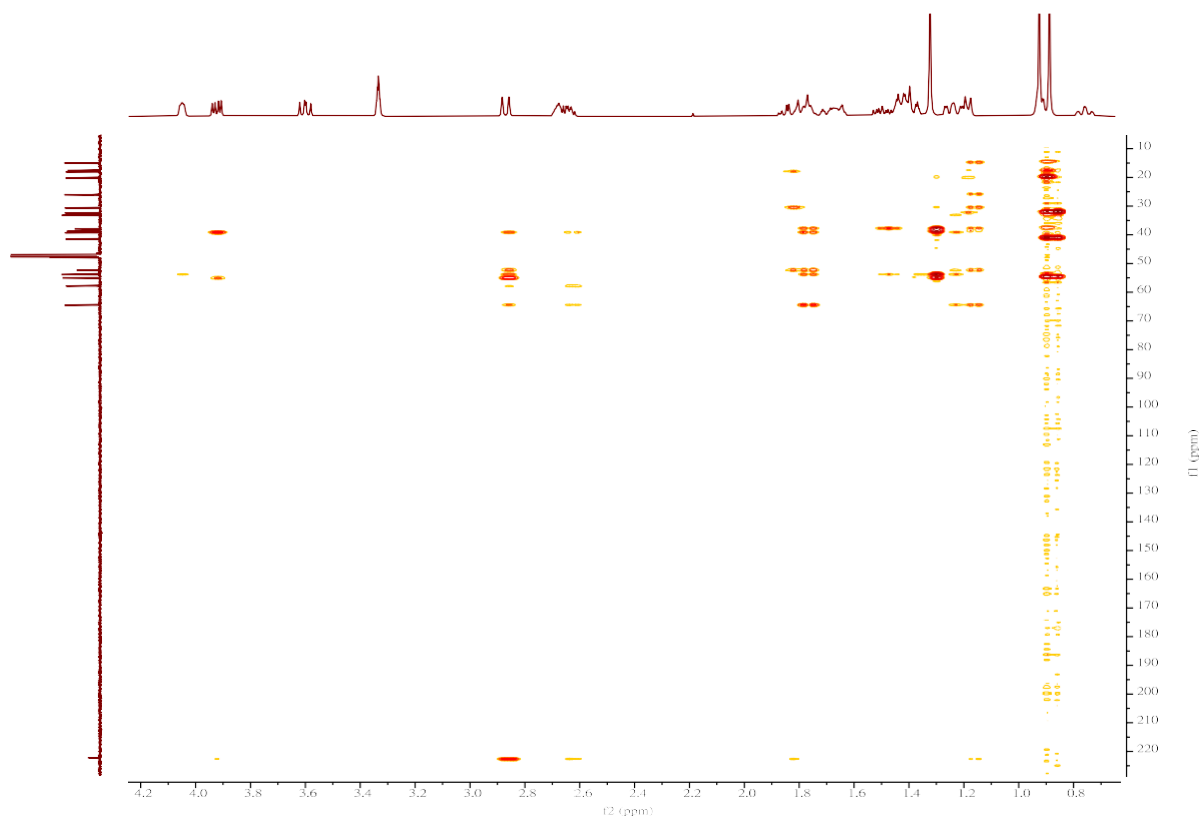

**Figure S12.** HMBC spectrum of mesonol B (**2**)



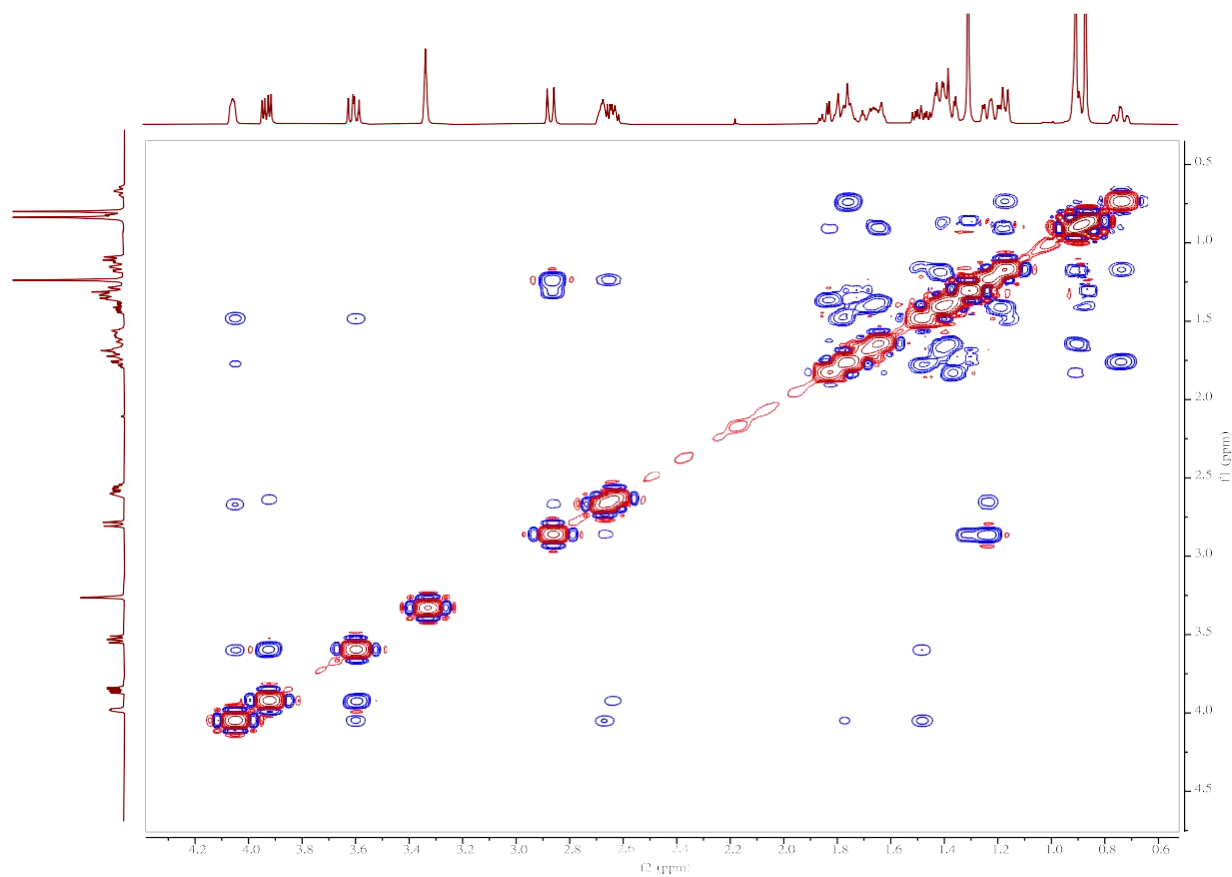

**Figure S13.** NOESY spectrum of mesonol B (2)

2PPD4681 #127 RT: 1.23 AV: 1 NL: 3.72E8  
T: FTMS + p ESI Full ms [50.0000-750.0000]

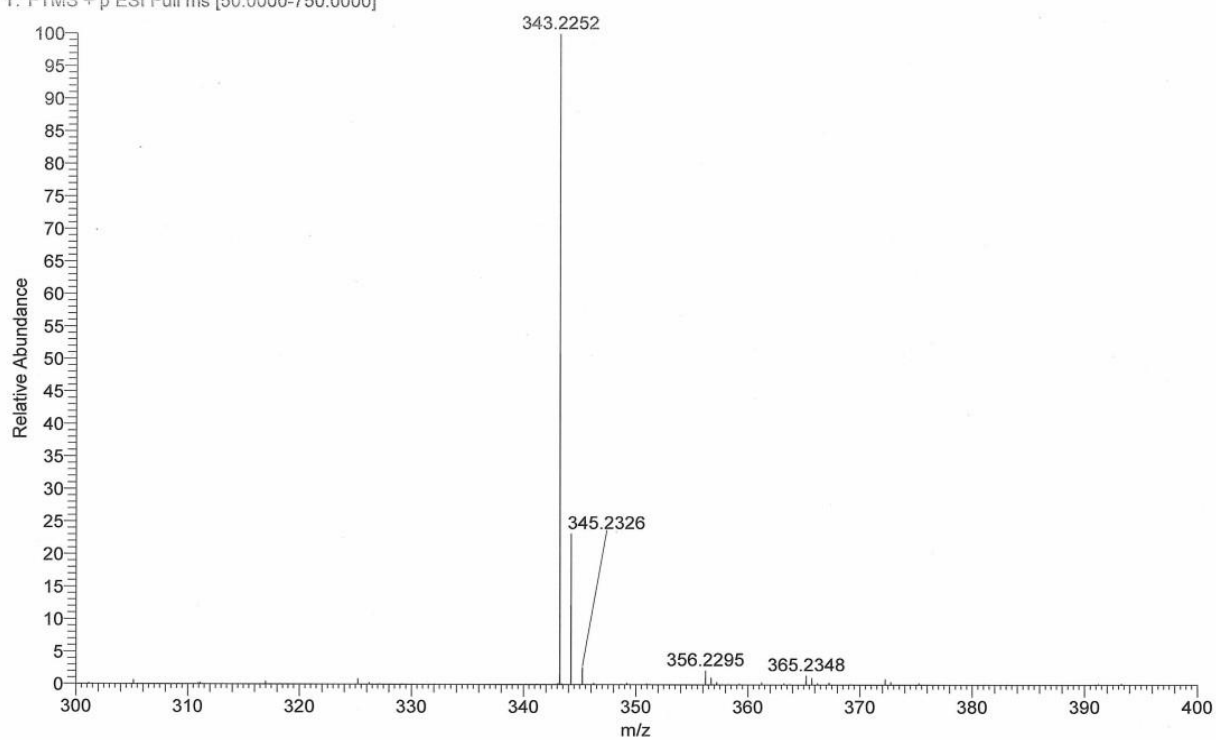

**Figure S14.** (+)-HRESIMS spectrum of mesonol B (**2**)

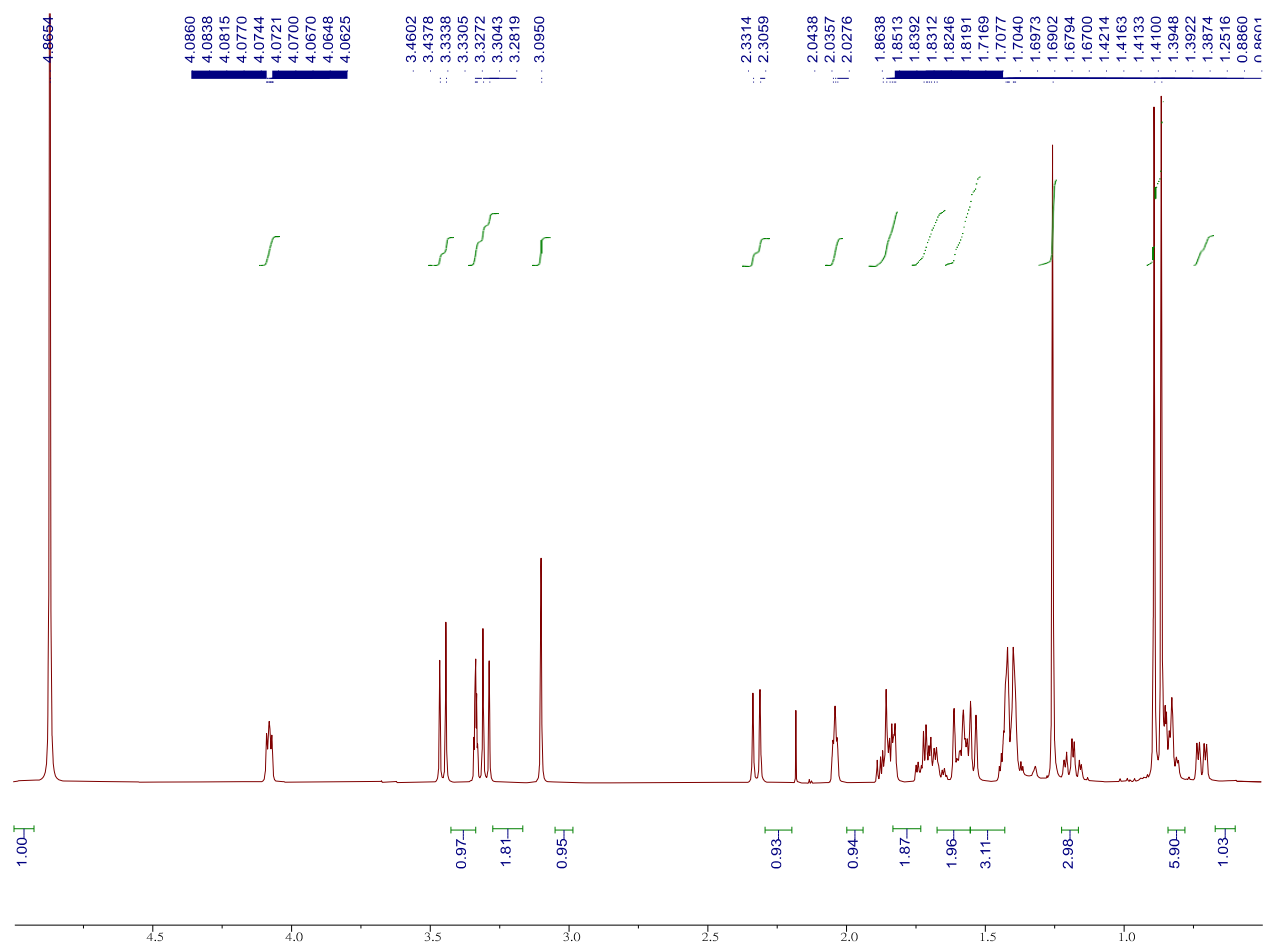

**Figure S15.**  $^1\text{H}$ -NMR spectrum of mesonol C (**3**) in  $\text{MeOD-}d_4$  (500 MHz)

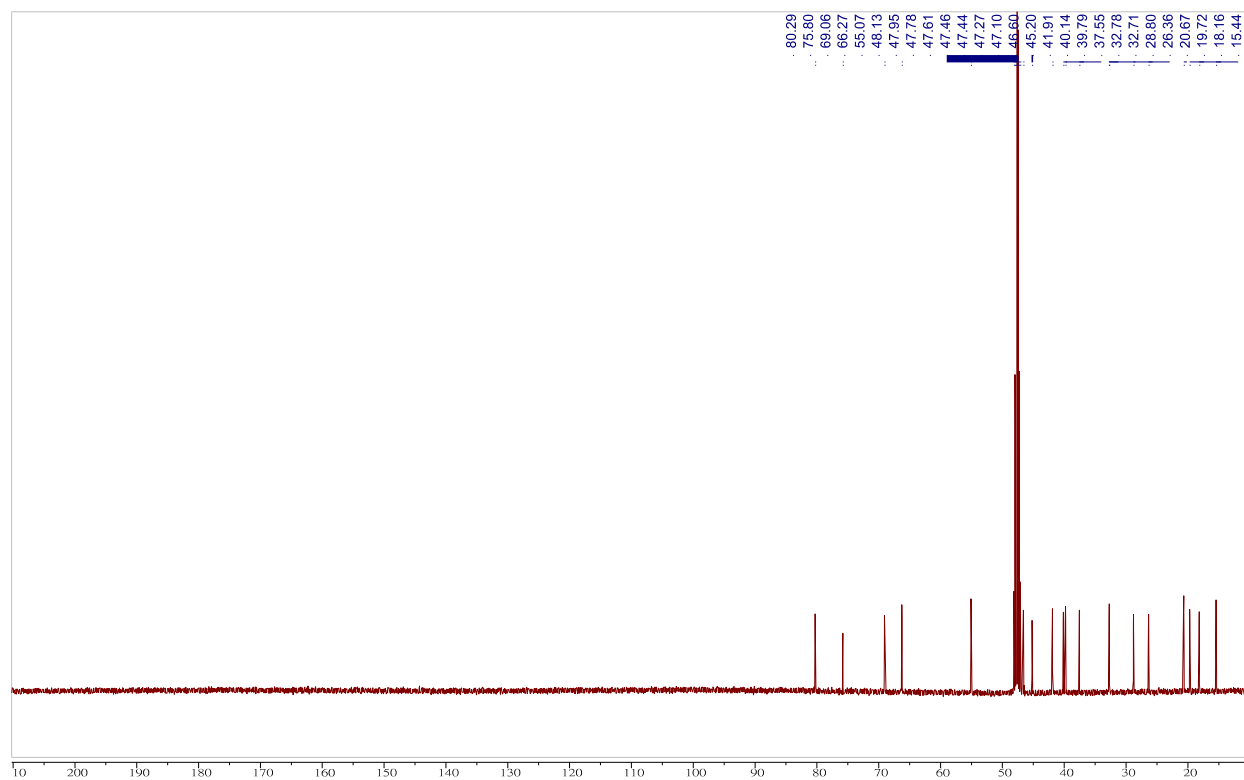

**Figure S16.**  $^{13}\text{C}$ -NMR spectrum of mesonol C (**3**) in  $\text{MeOD-}d_4$  (125 MHz)

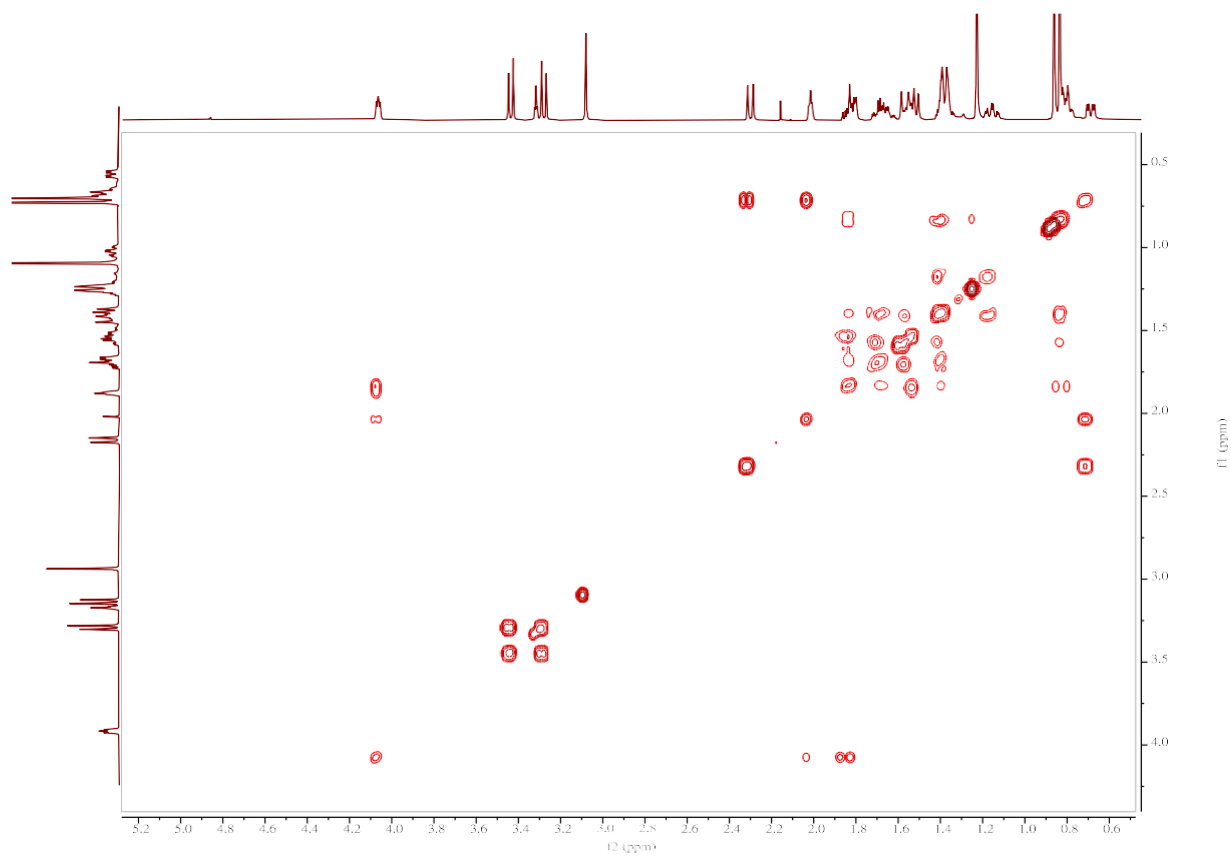

**Figure S17.** COSY spectrum of mesonol C (**3**)

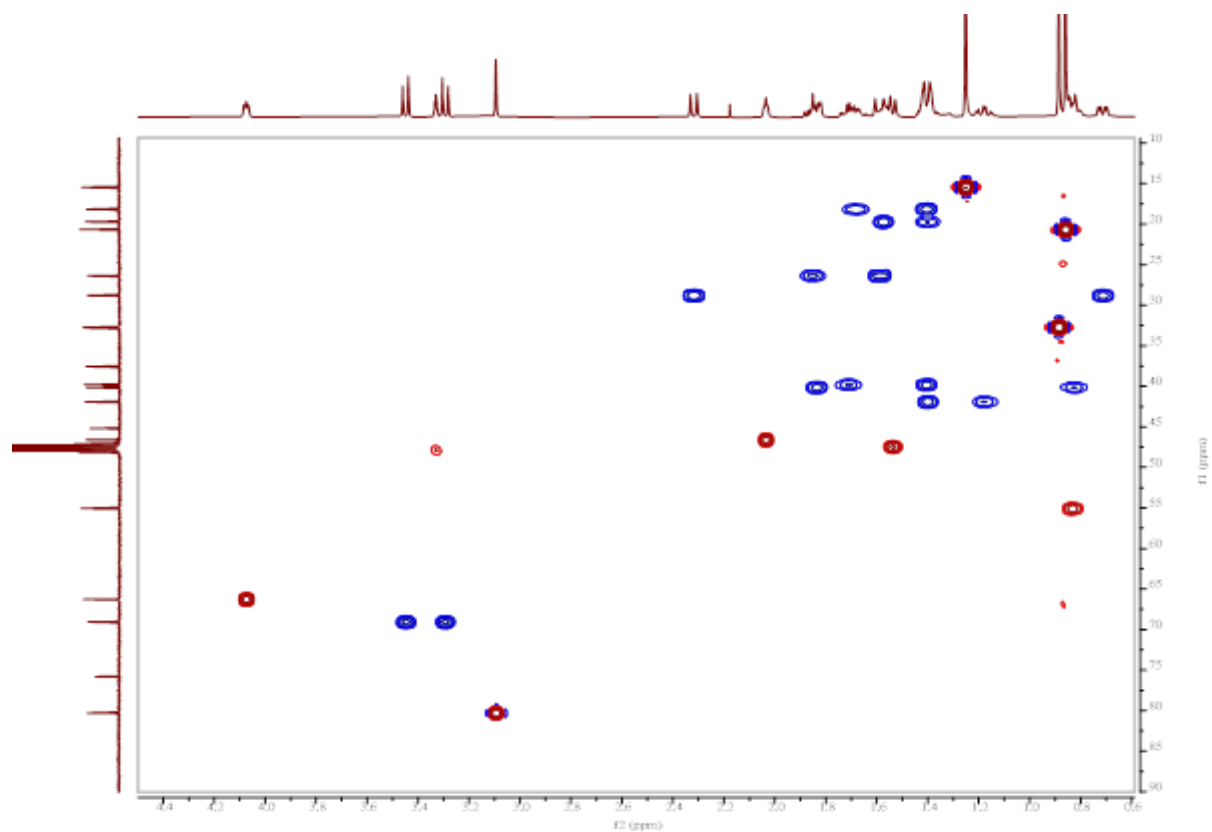

**Figure S18.** HSQC spectrum of mesonol C (**3**)

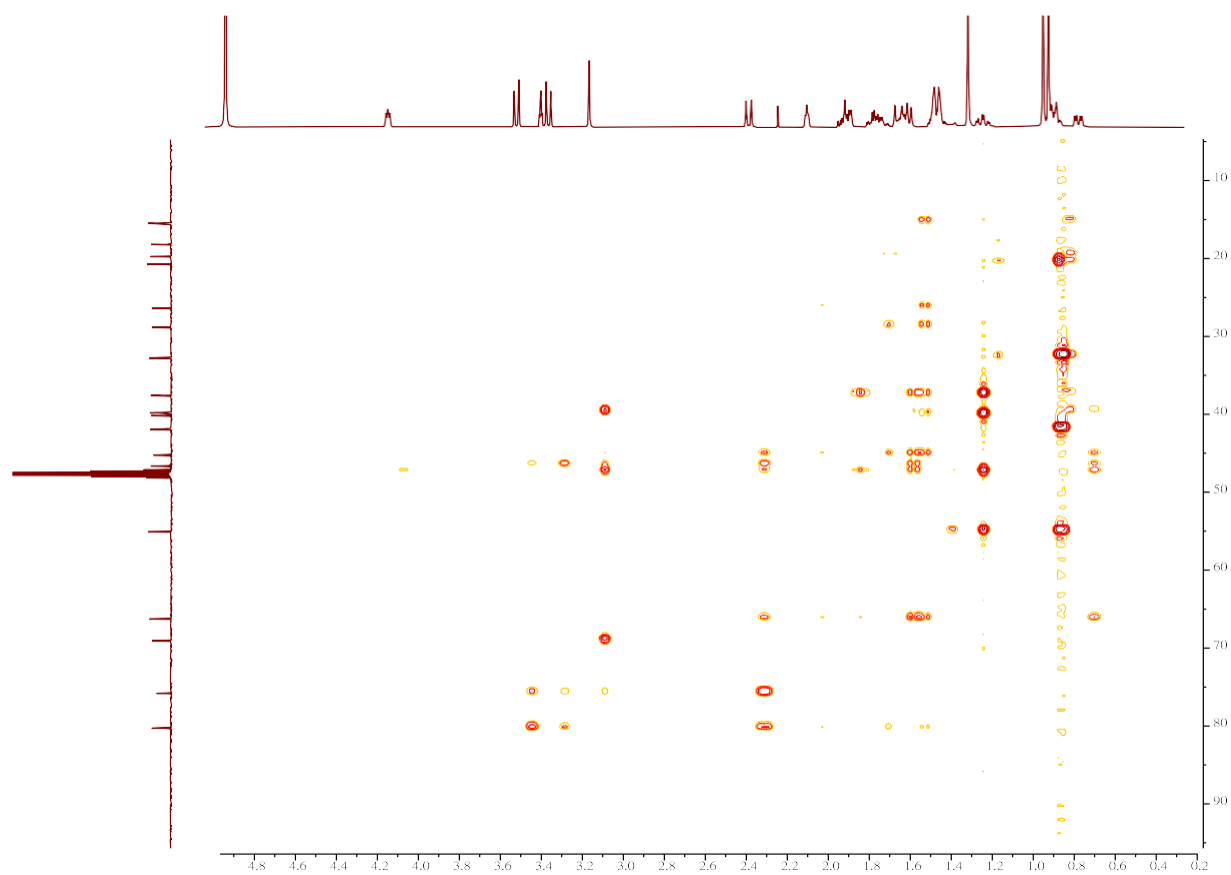

**Figure S19.** HMBC spectrum of mesonol C (**3**)

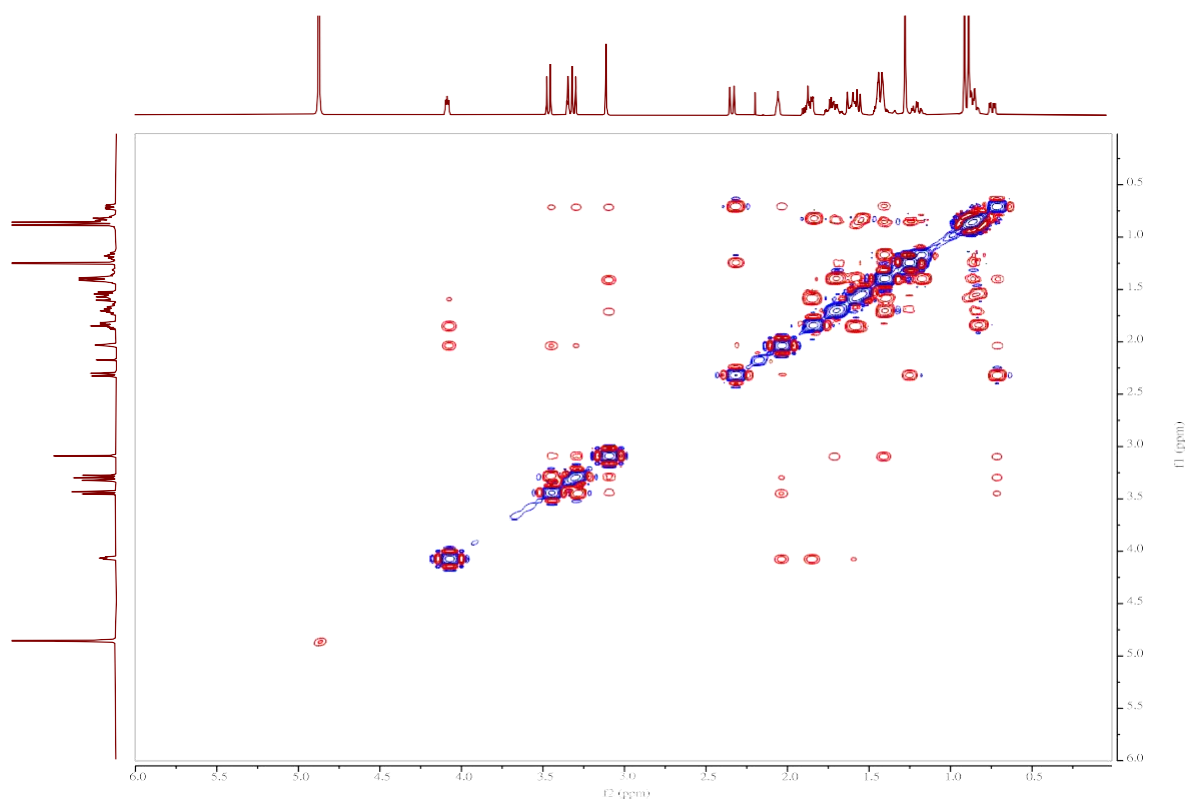

**Figure S20.** NOESY spectrum of mesonol C (**3**)



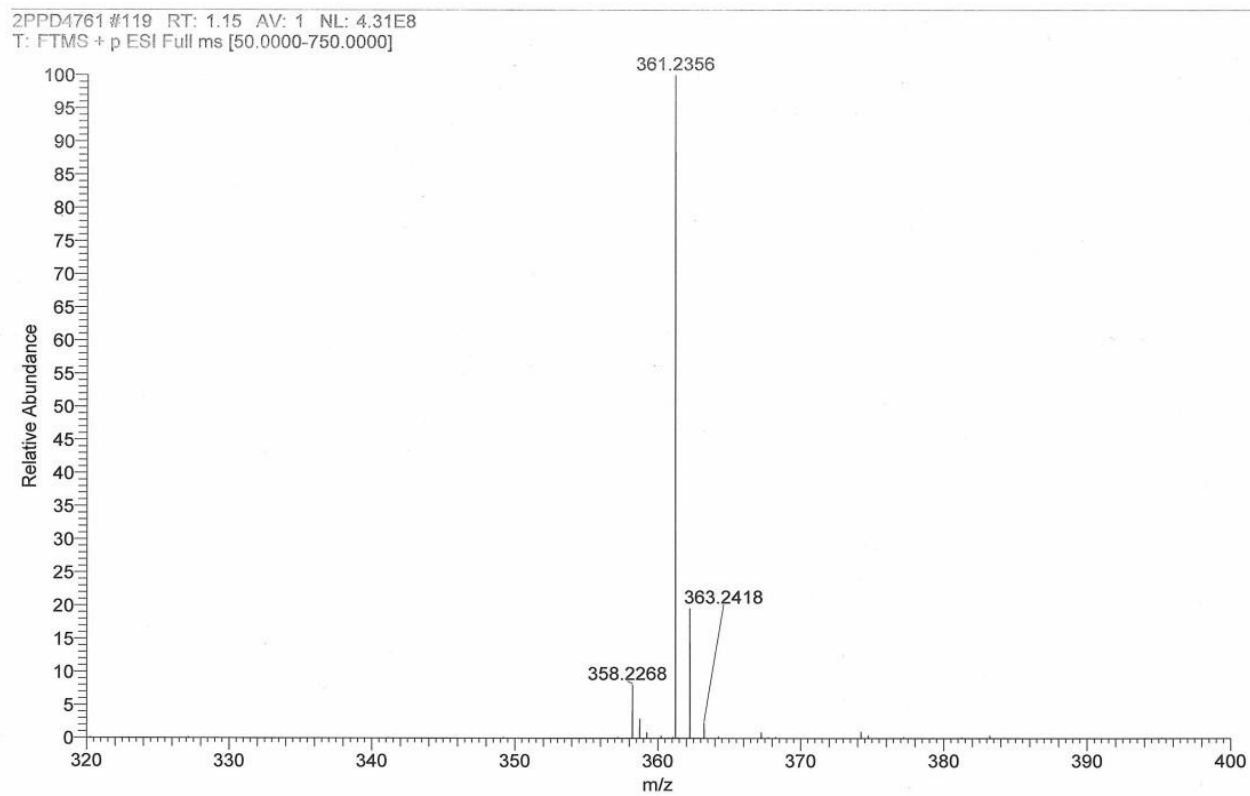

**Figure S21.** (+)-HRESIMS spectrum of mesonol C (**3**)

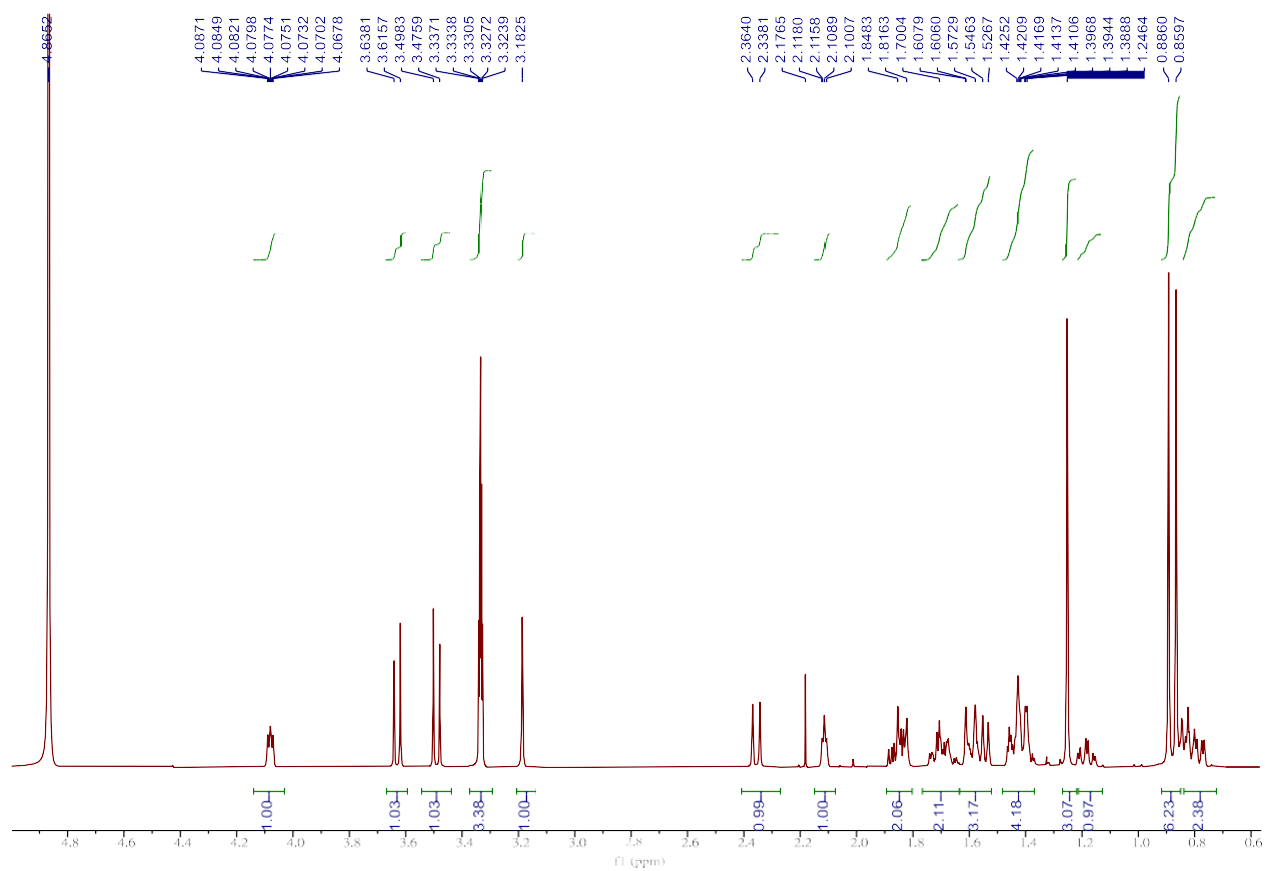

**Figure S22.**  $^1\text{H}$ -NMR spectrum of mesonol D (**4**) in  $\text{MeOD-}d_4$  (500 MHz)

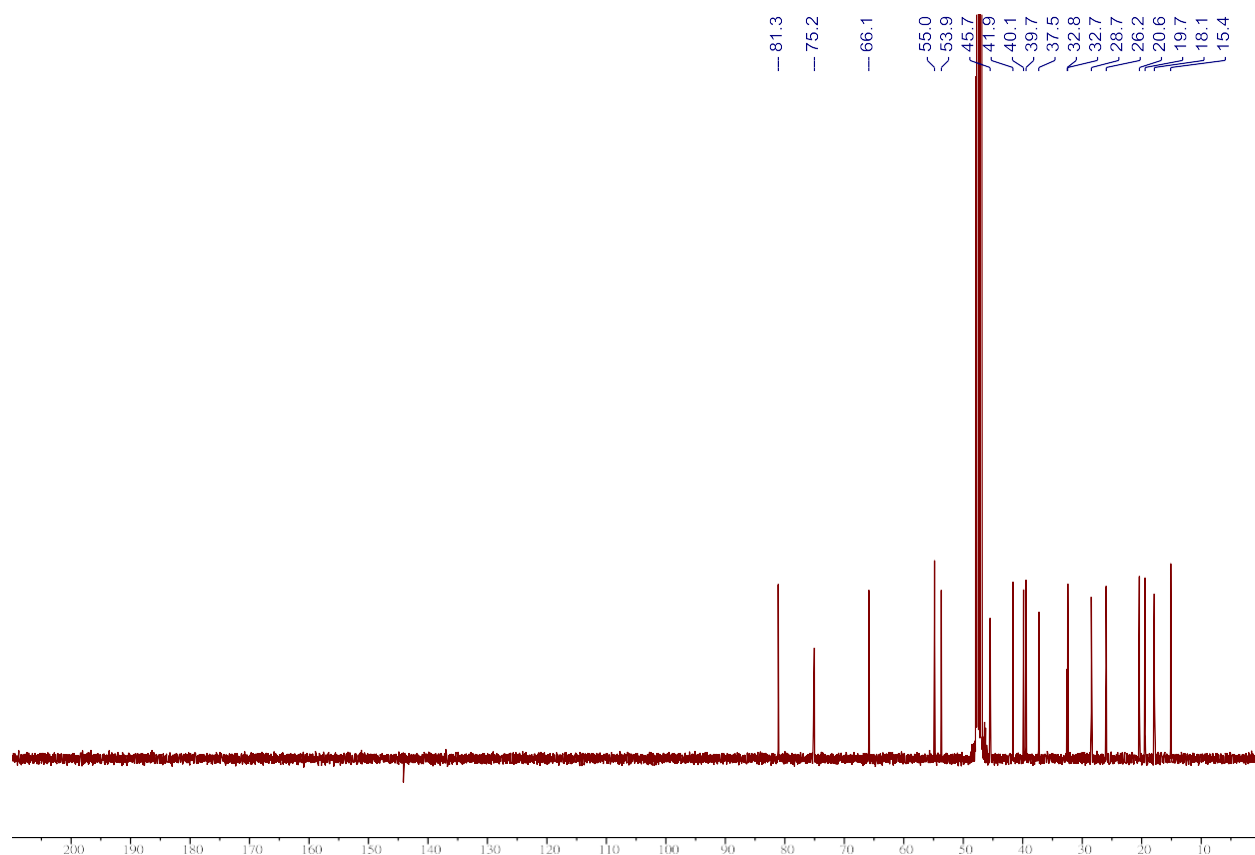

**Figure S23.**  $^{13}\text{C}$ -NMR spectrum of mesonol D (4) in  $\text{MeOD-}d_4$  (125 MHz)

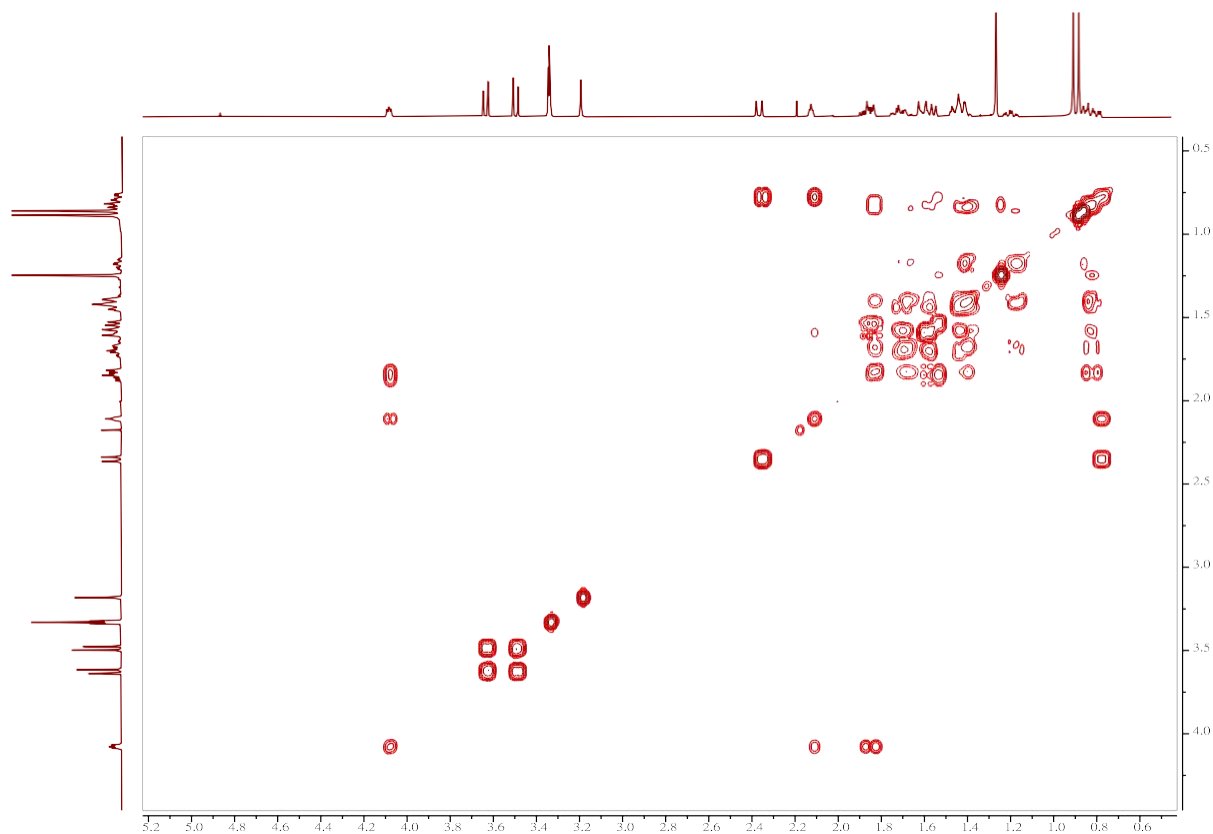

**Figure S24.** COSY spectrum of mesonol D (**4**)

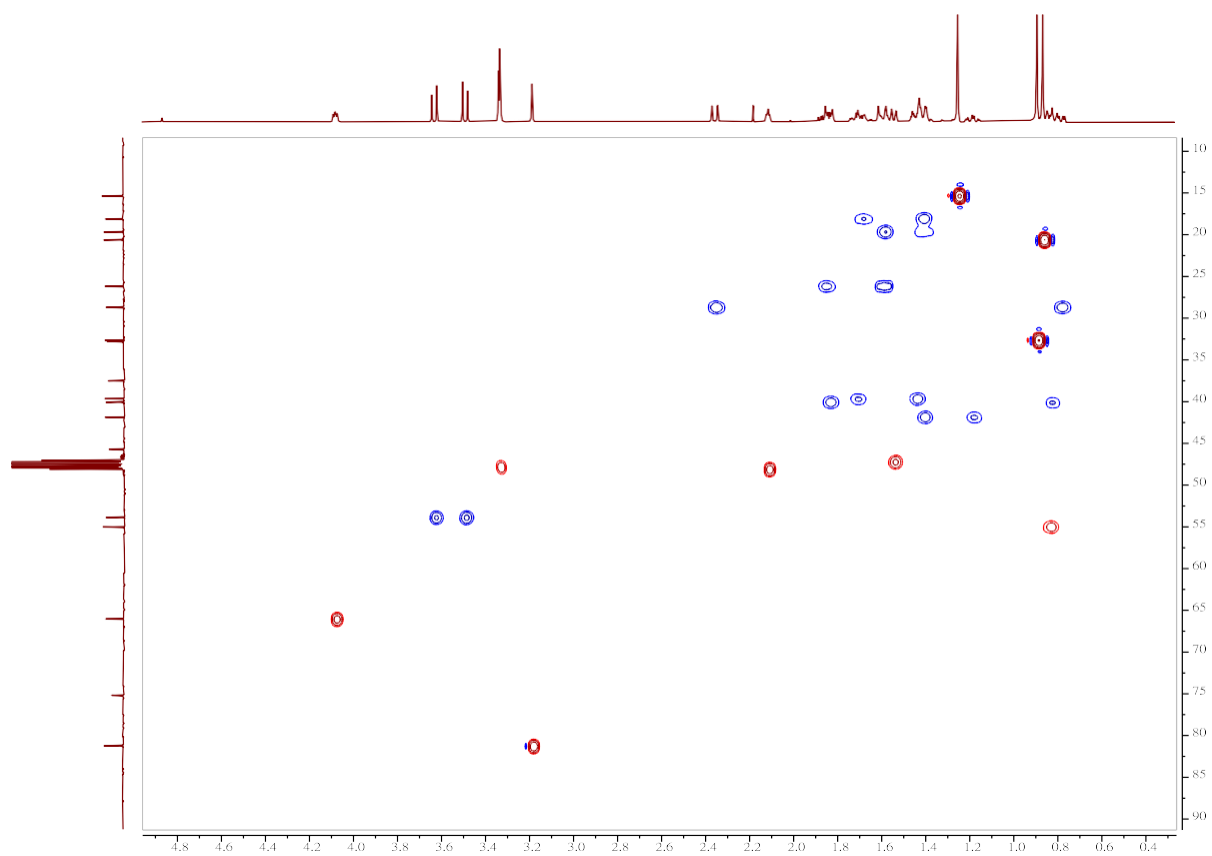

**Figure S25.** HSQC spectrum of mesonol D (4)

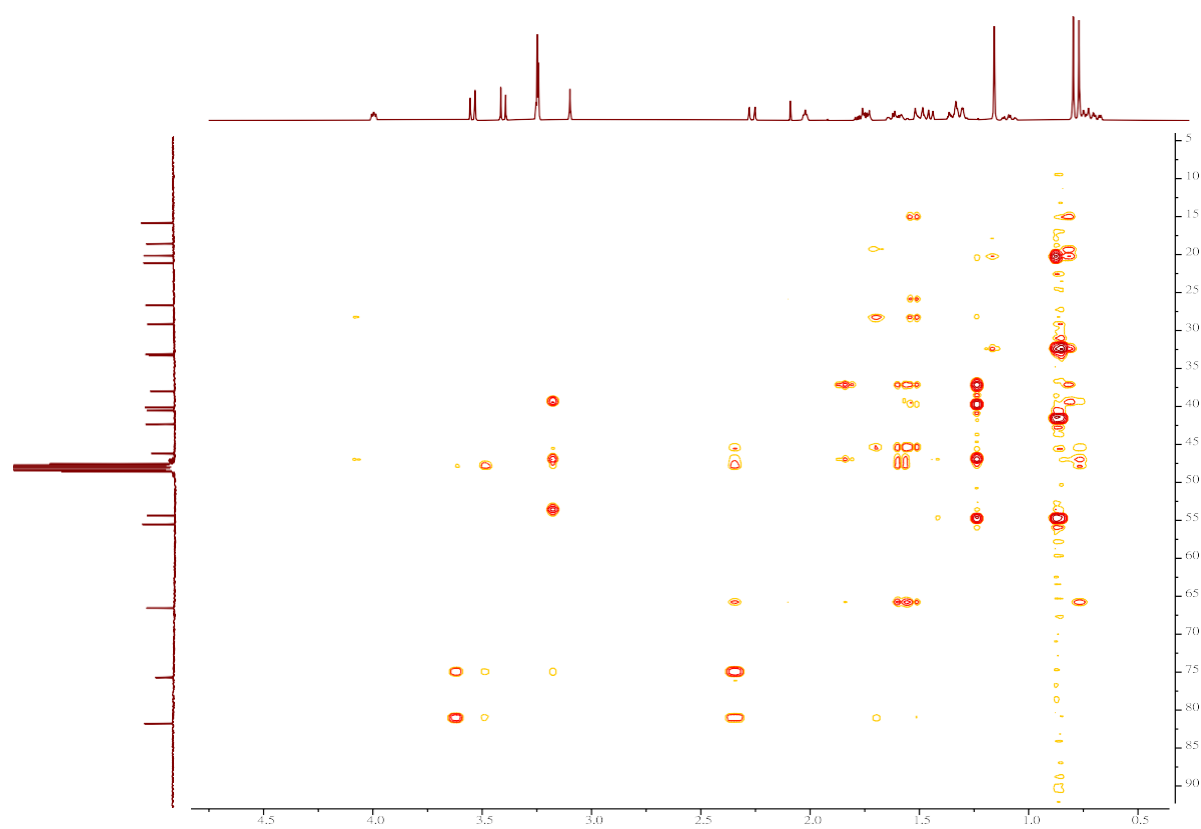

**Figure S26.** HMBC spectrum of mesonol D (**4**)

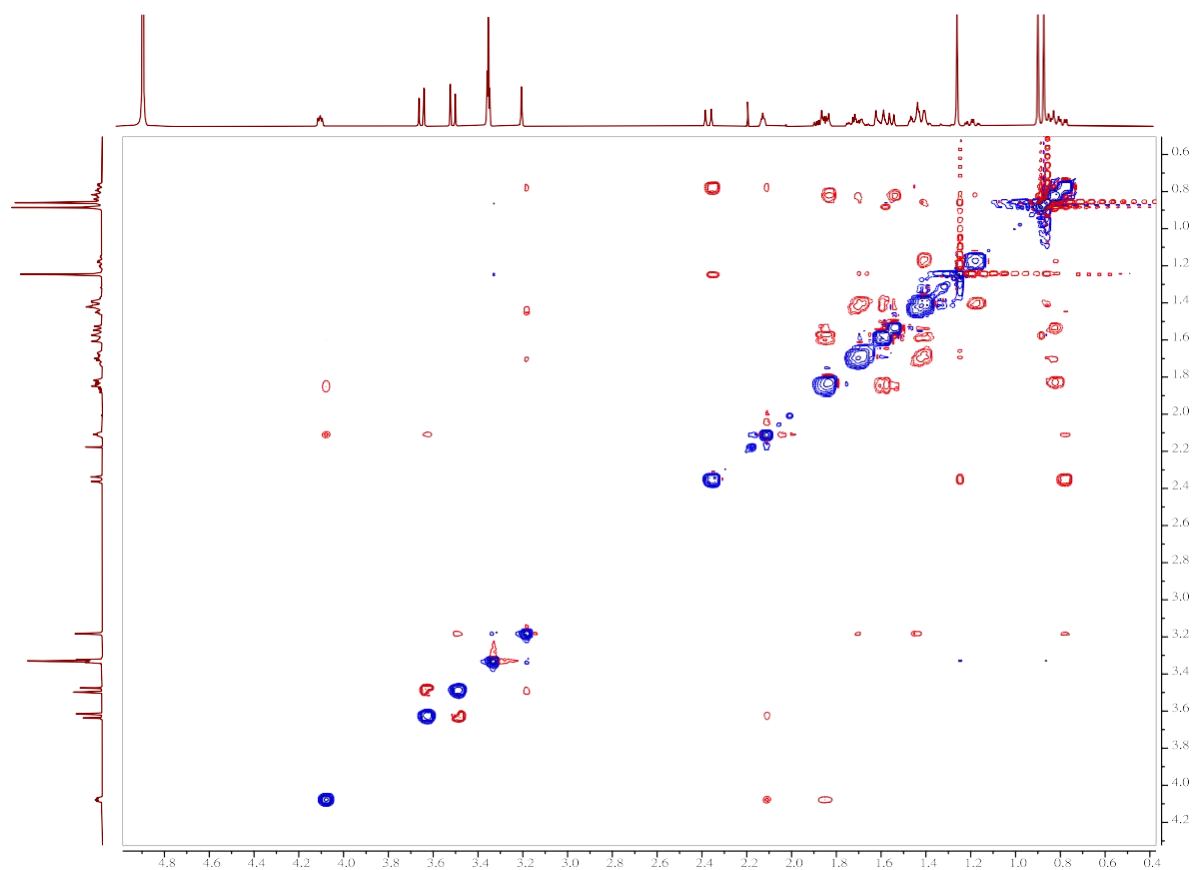

**Figure S27.** NOESY spectrum of mesonol D (**4**)

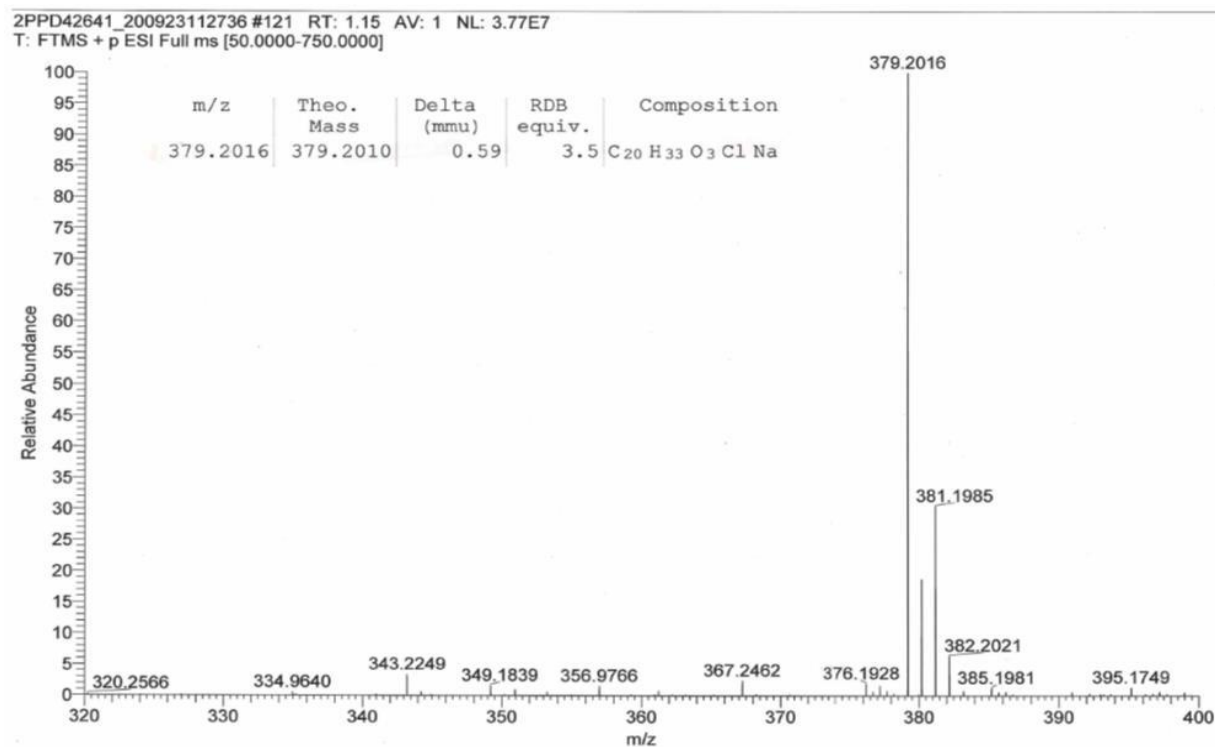

**Figure S28.** (+)-HRESIMS spectrum of mesonol D (**4**)



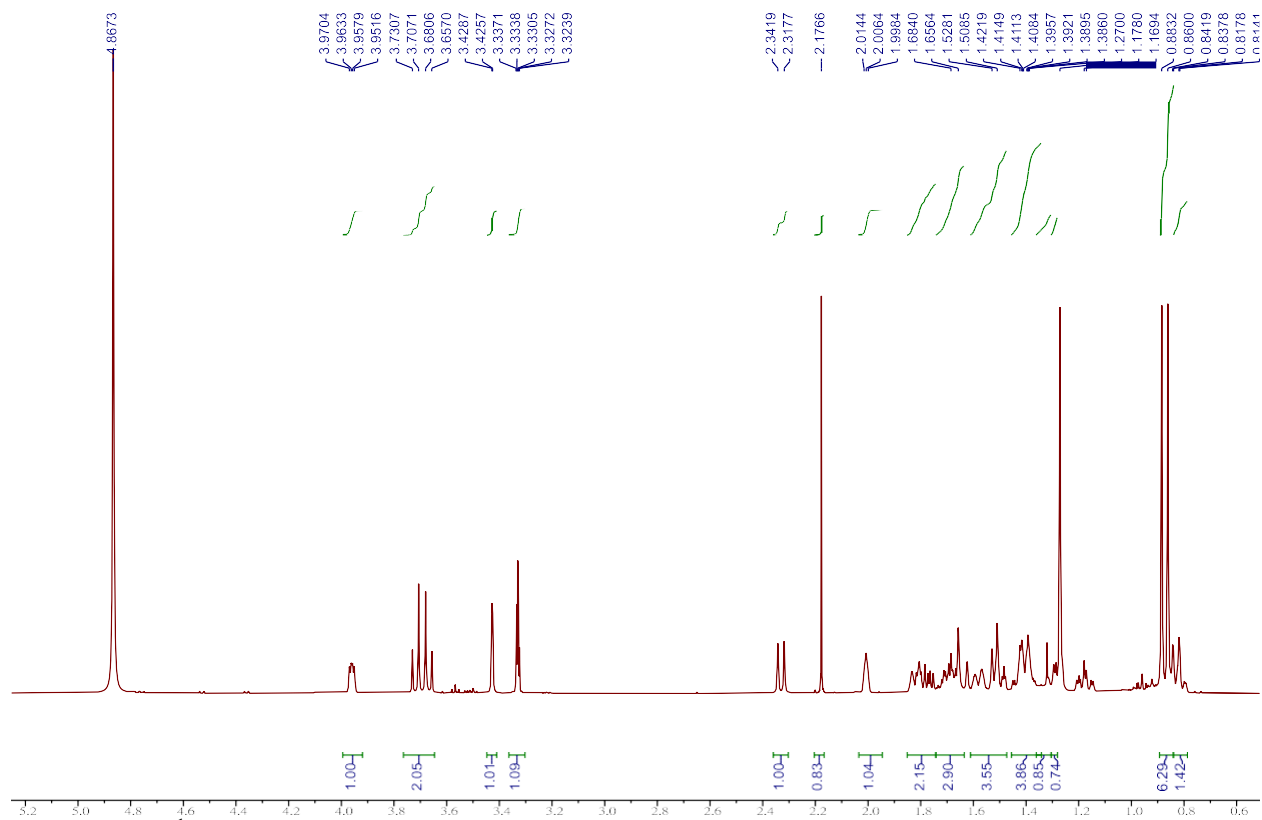

**Figure S29.**  $^1\text{H}$ -NMR spectrum of mesenol E (**5**) in  $\text{MeOD-}d_4$  (500MHz)

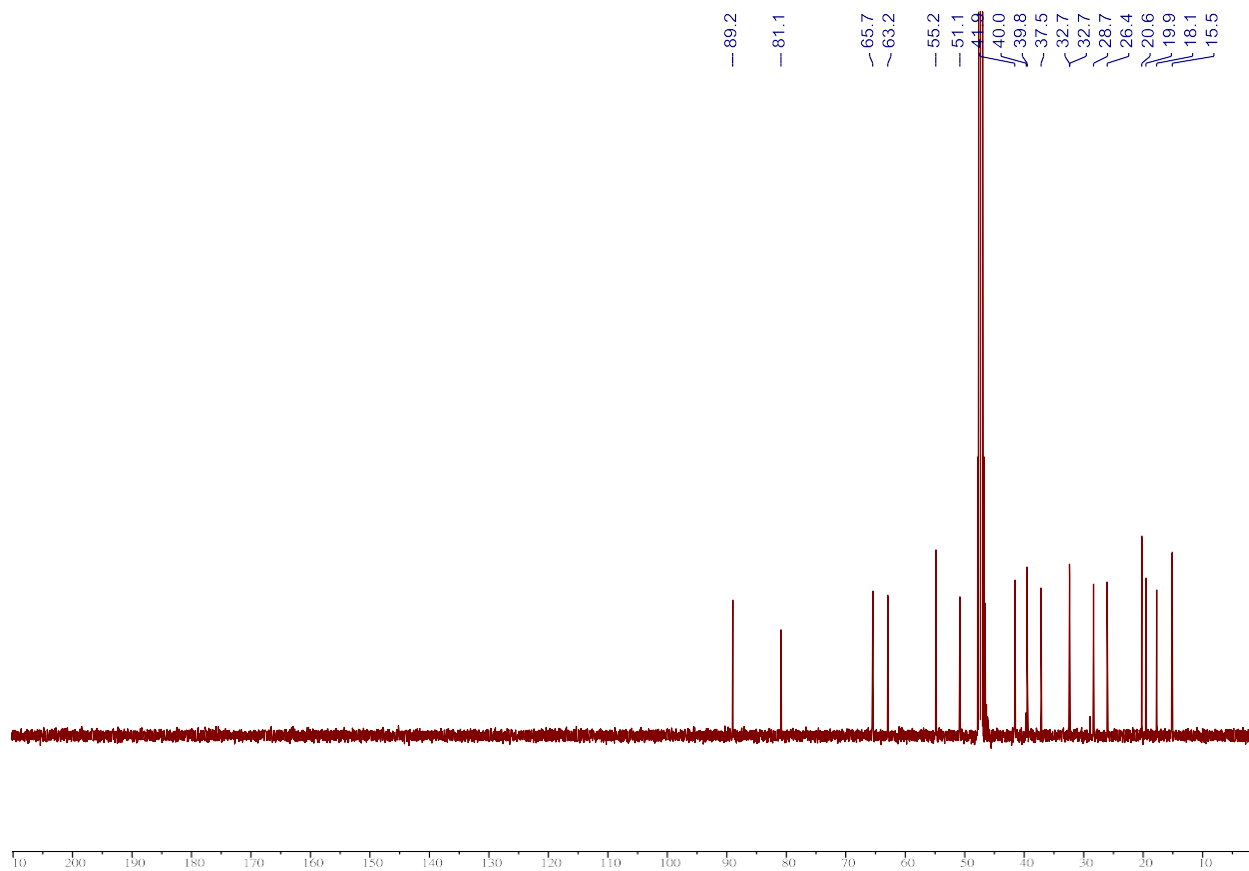

**Figure S30.** <sup>13</sup>C-NMR spectrum of mesonol E (**5**) in MeOD-*d*<sub>4</sub> (125MHz)

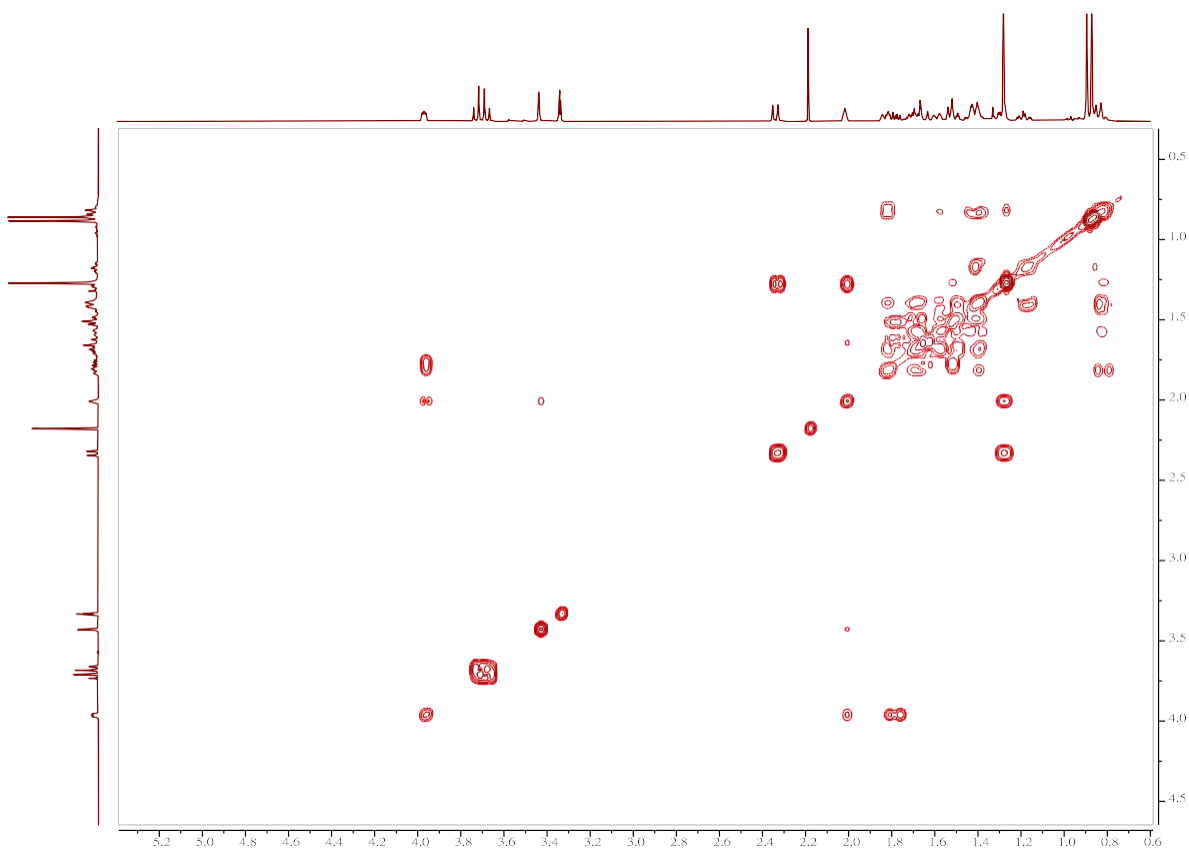

**Figure S31.** COSY spectrum of mesonol E (**5**)

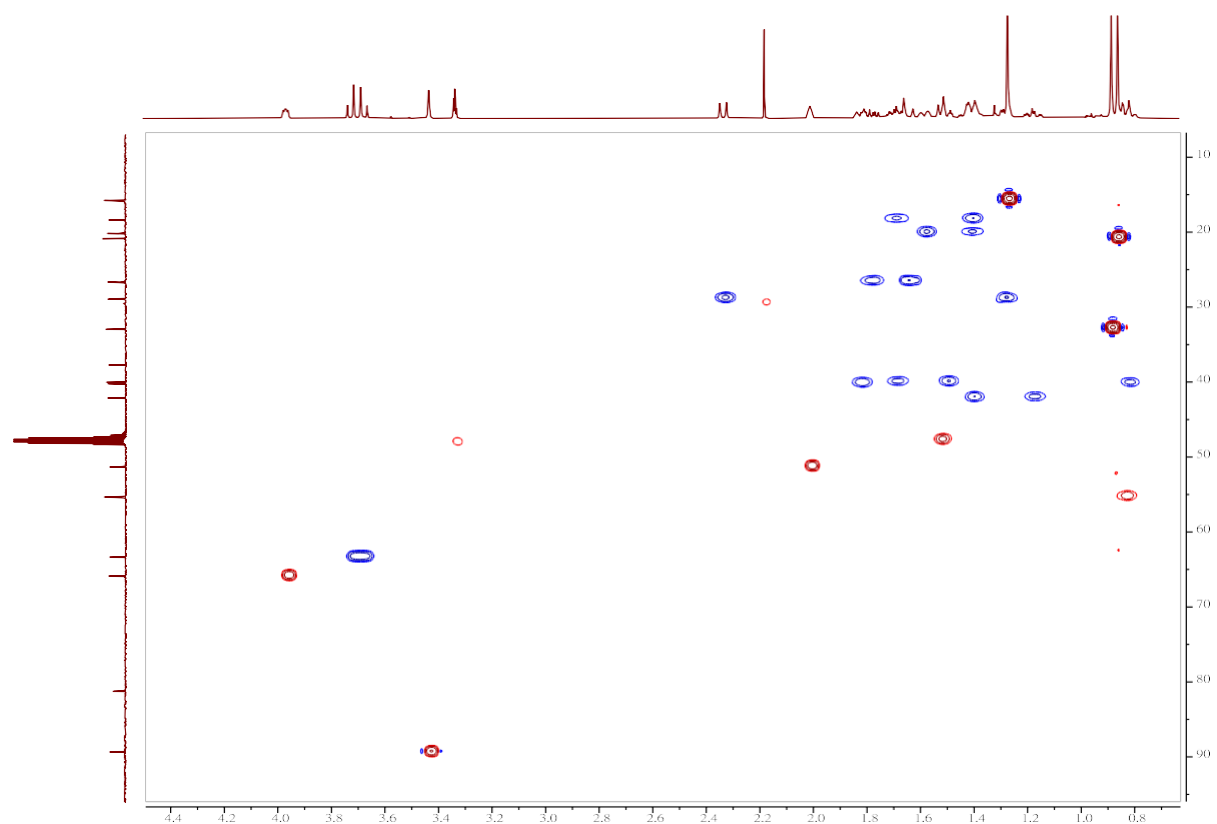

**Figure S32.** HSQC spectrum of mesonol E (**5**)

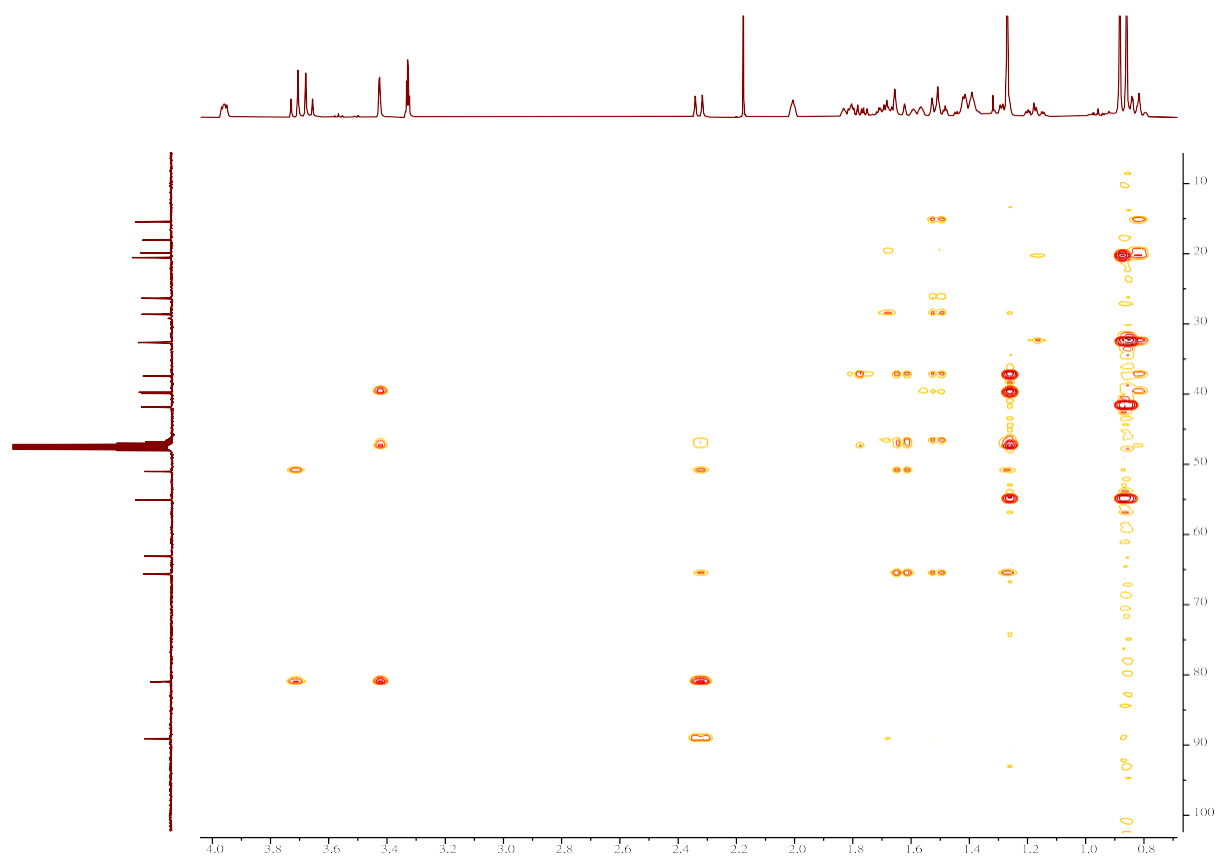

**Figure S33.** HMBC spectrum of mesonol E (**5**)

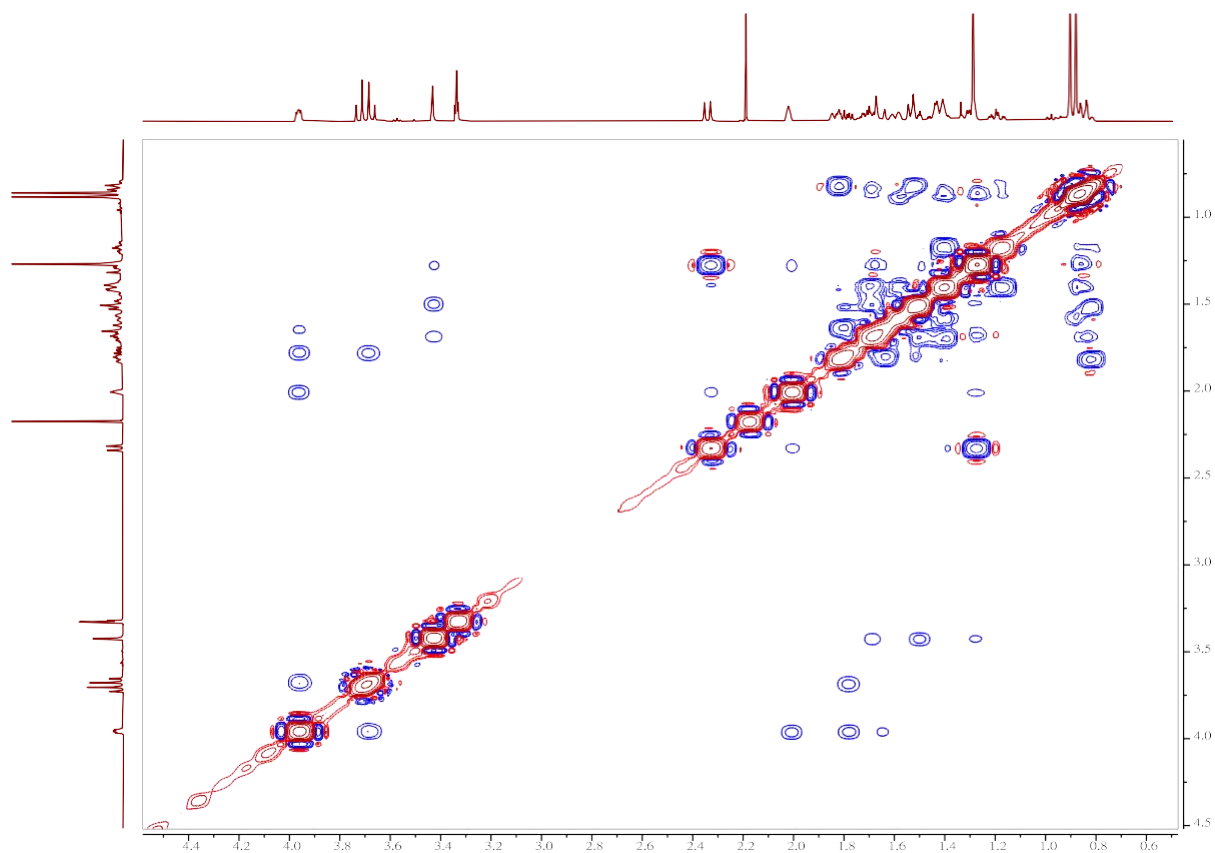

**Figure S34.** NOESY spectrum of mesonol E (**5**)

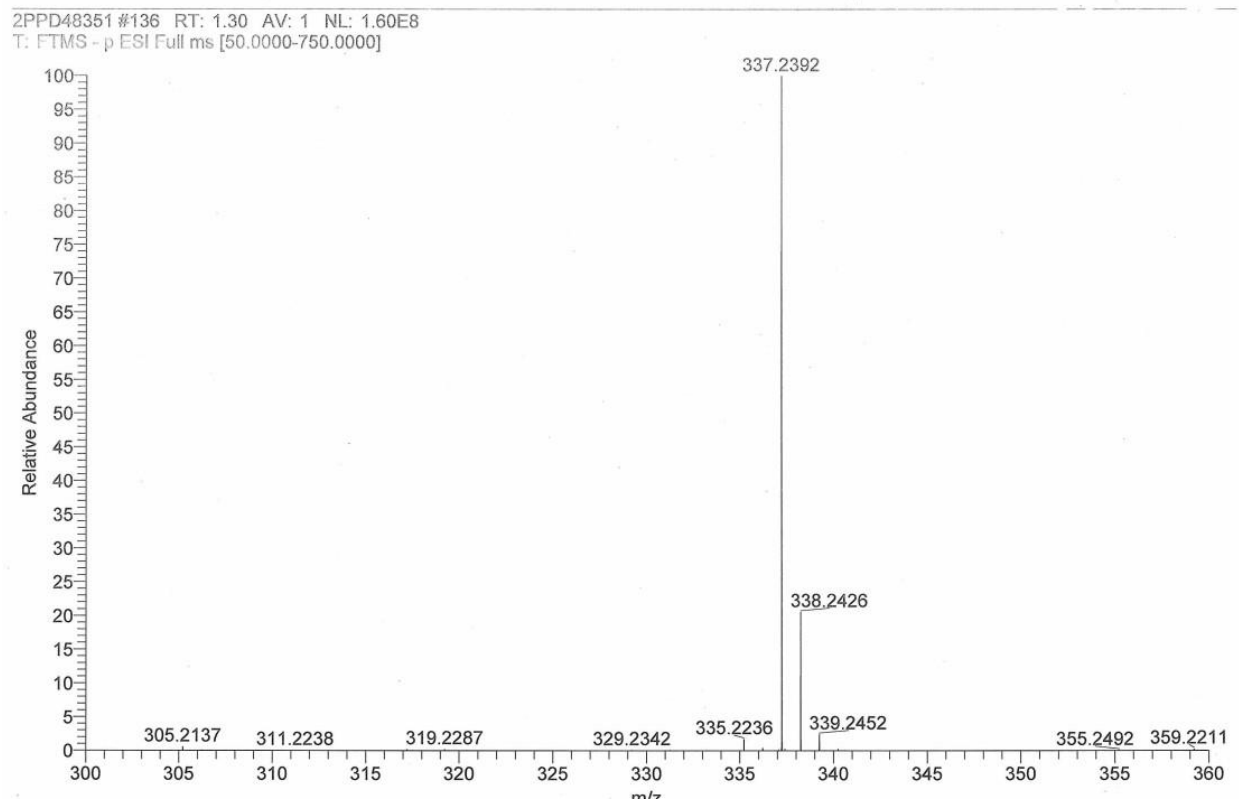

**Figure S35.** (–)-HRESIMS spectrum of mesonol E (**5**)

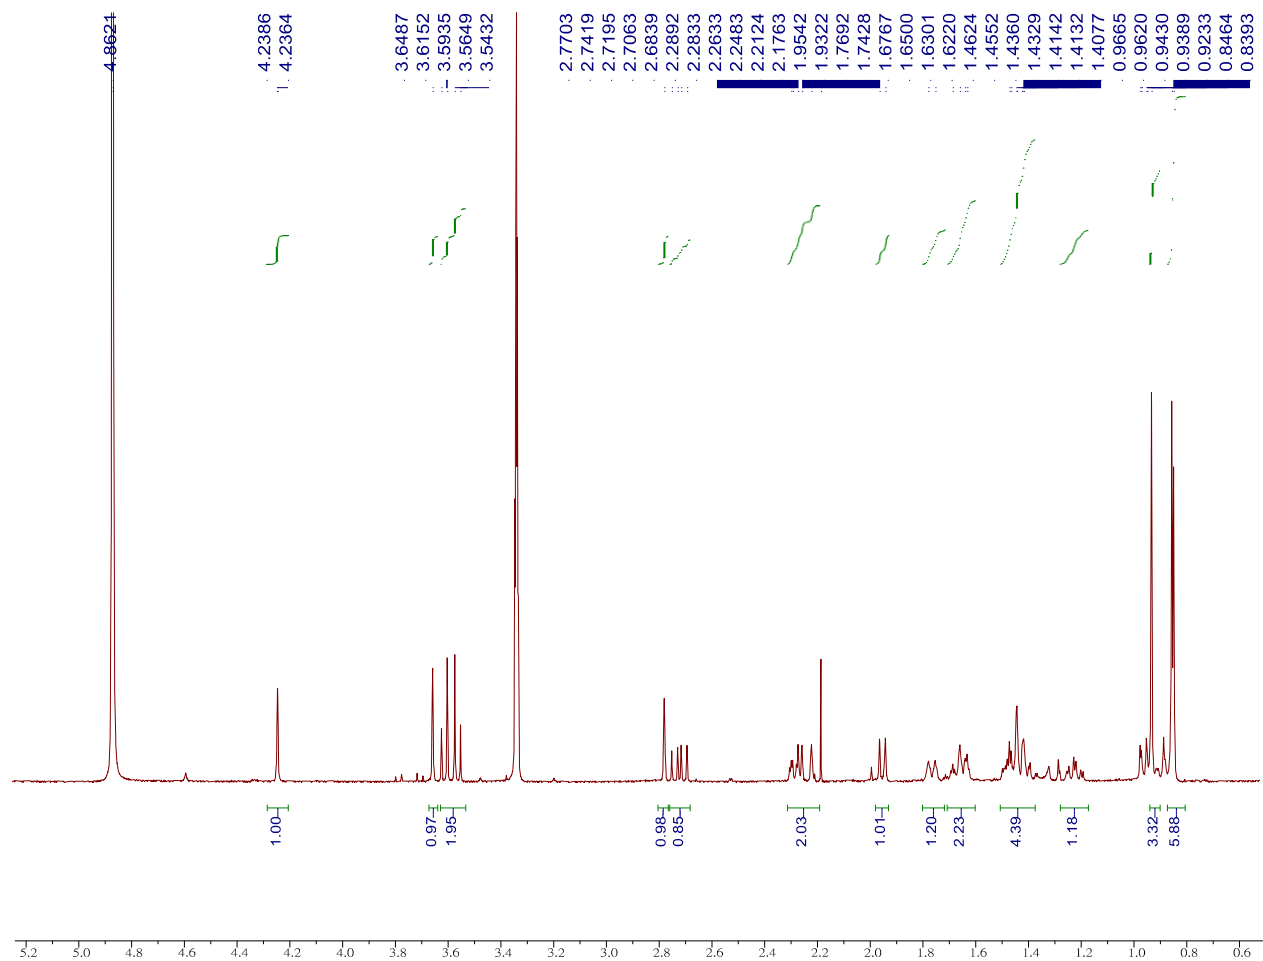

**Figure S36.**  $^1\text{H}$ -NMR spectrum of mesonol F (**6**) in  $\text{MeOD-}d_4$  (500 MHz)



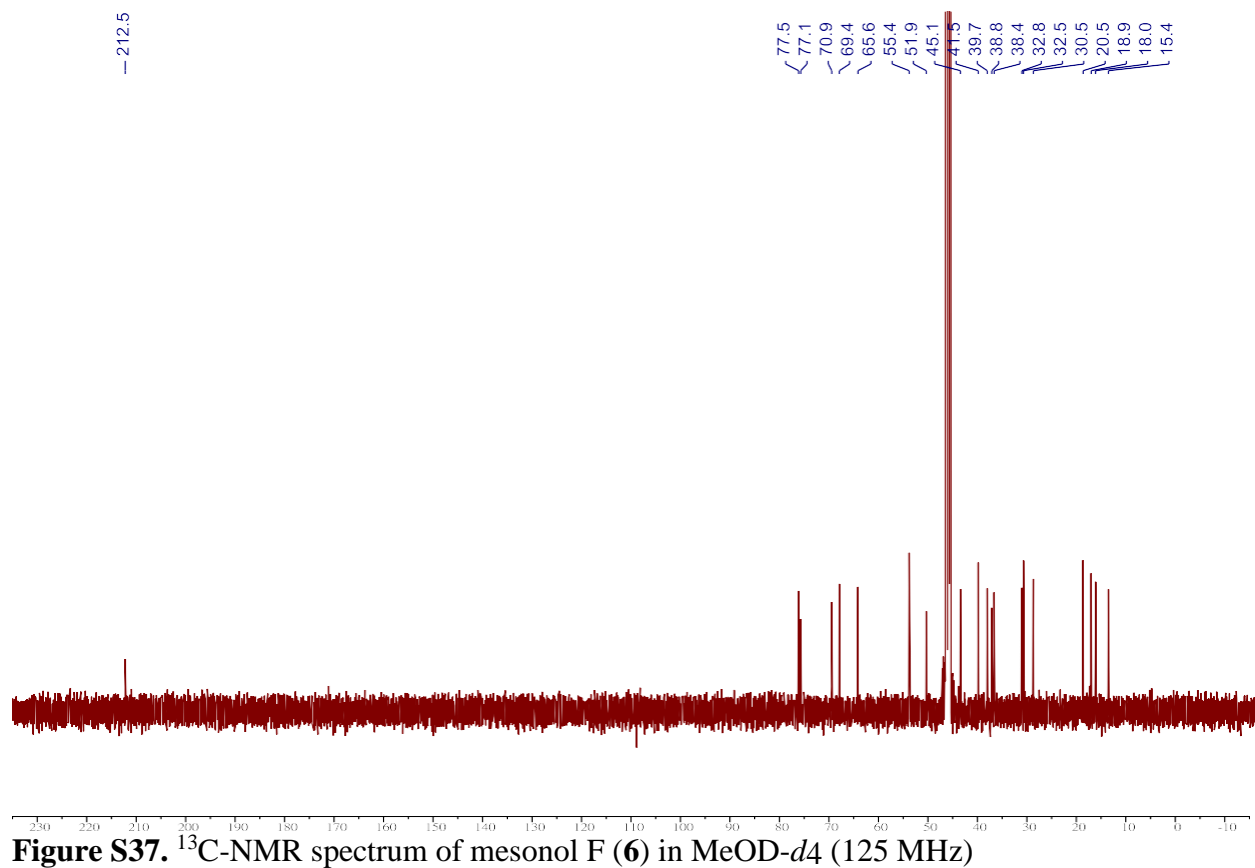

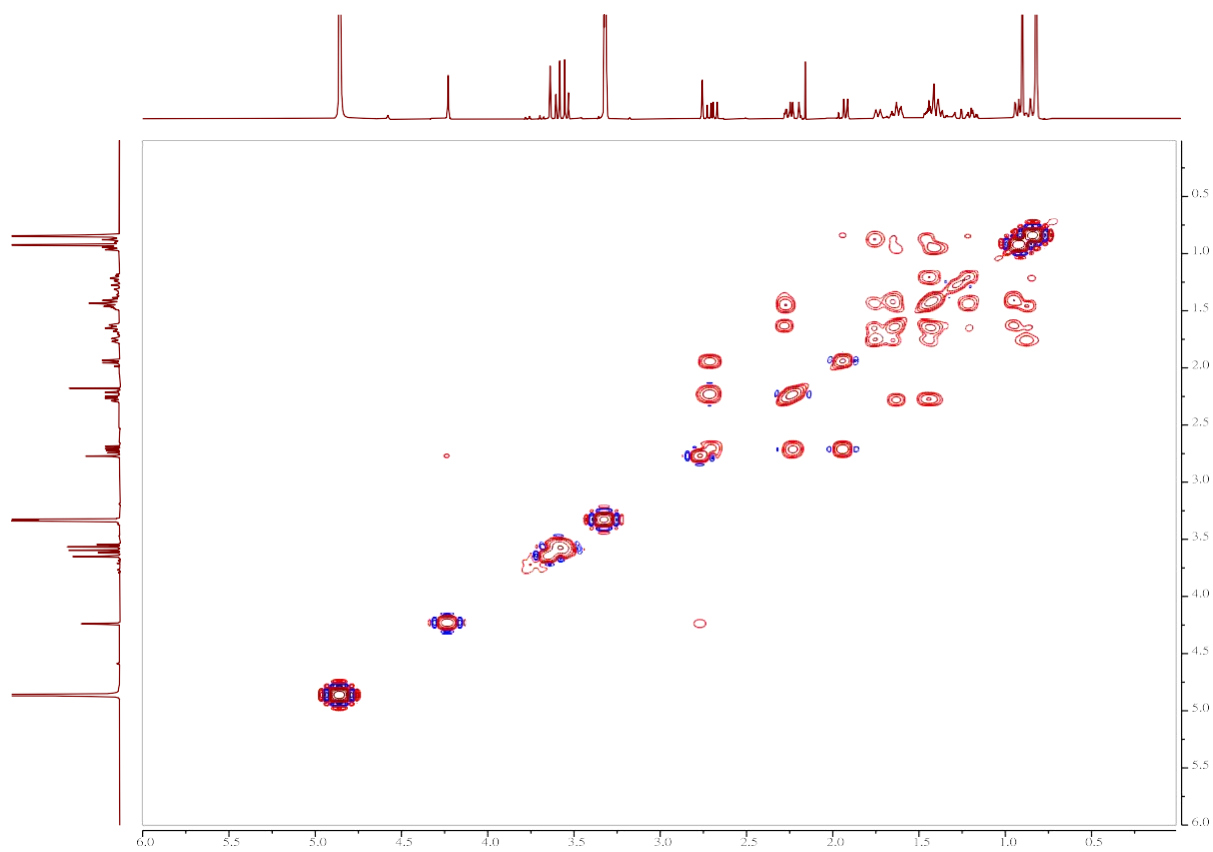

**Figure S38.** COSY spectrum of mesonol F (**6**)

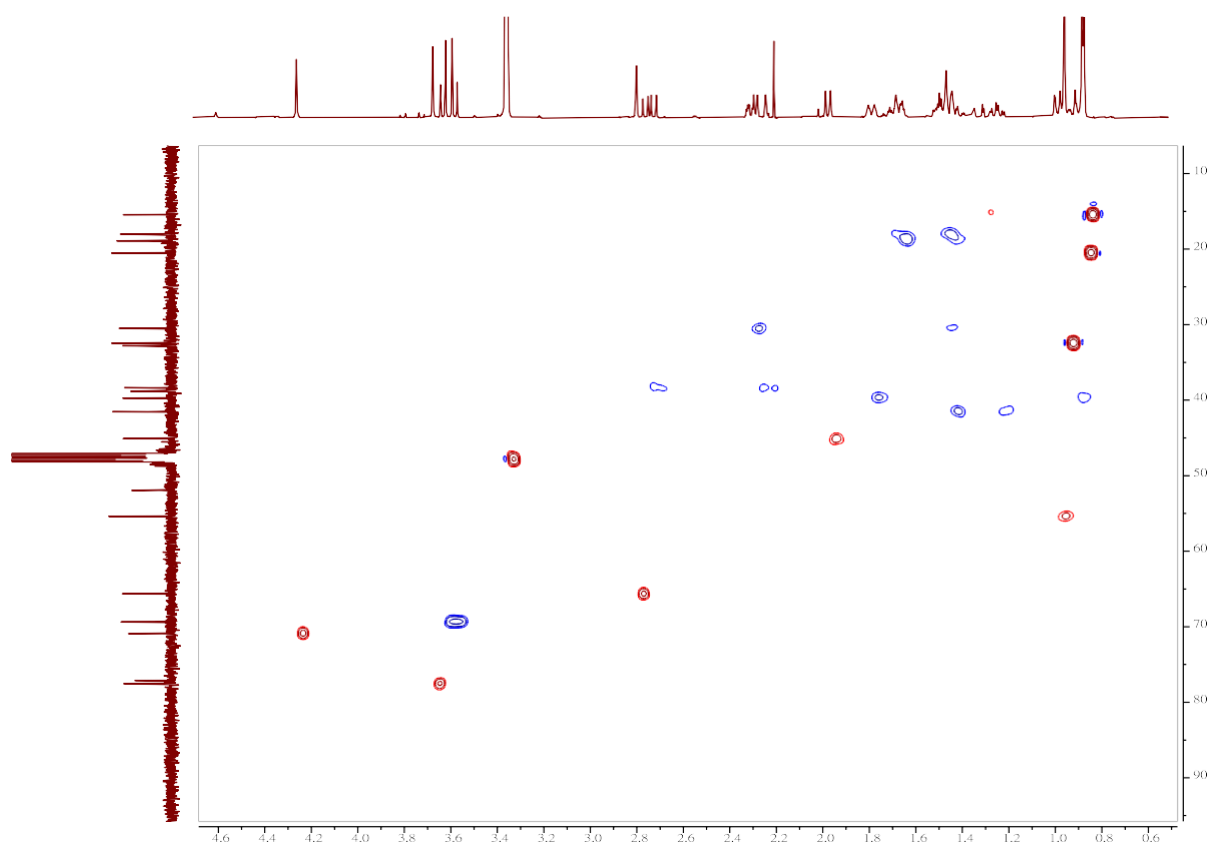

**Figure S39.** HSQC spectrum of mesonol F (**6**)

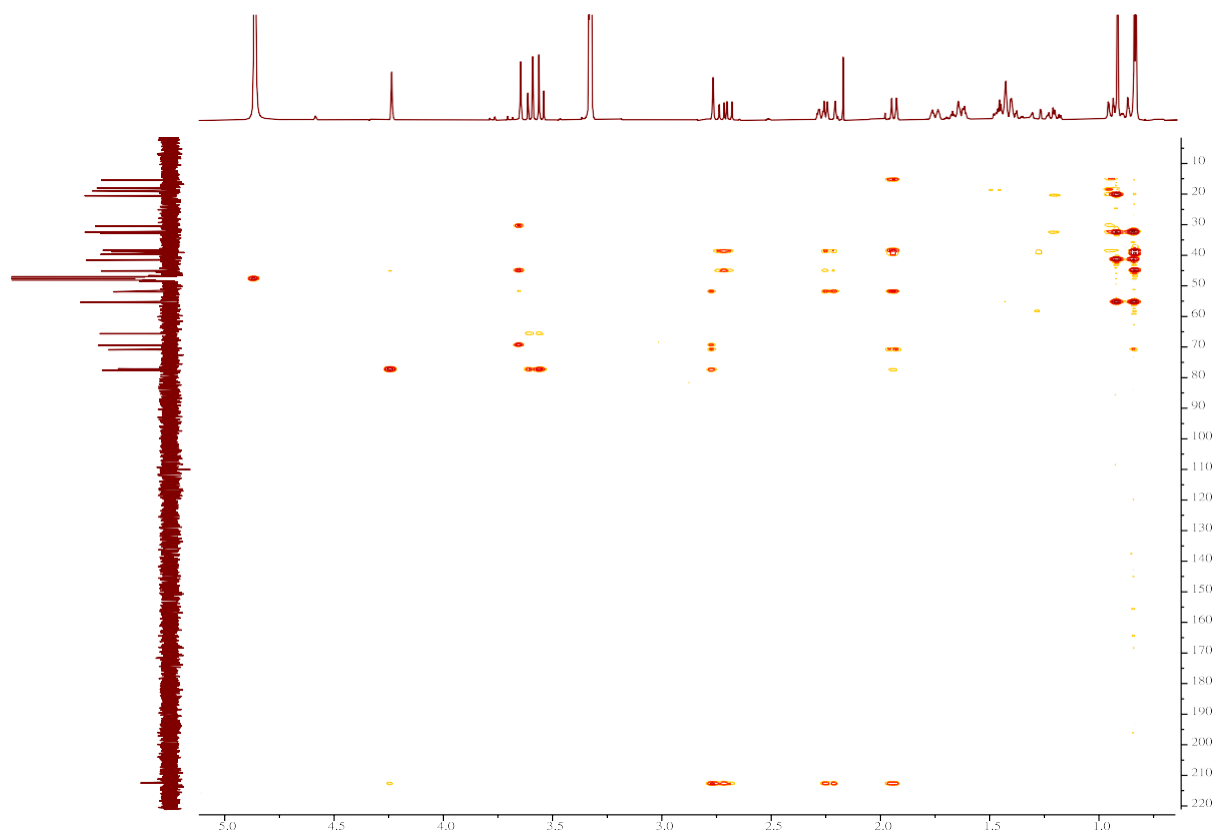

**Figure S40.** HMBC spectrum of mesonol F (**6**)

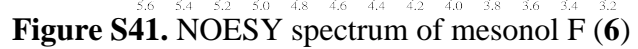

PPD28711 #113 RT: 1.10 AV: 1 NL: 1.94E8  
T: FTMS + p ESI Full ms [50.0000-750.0000]

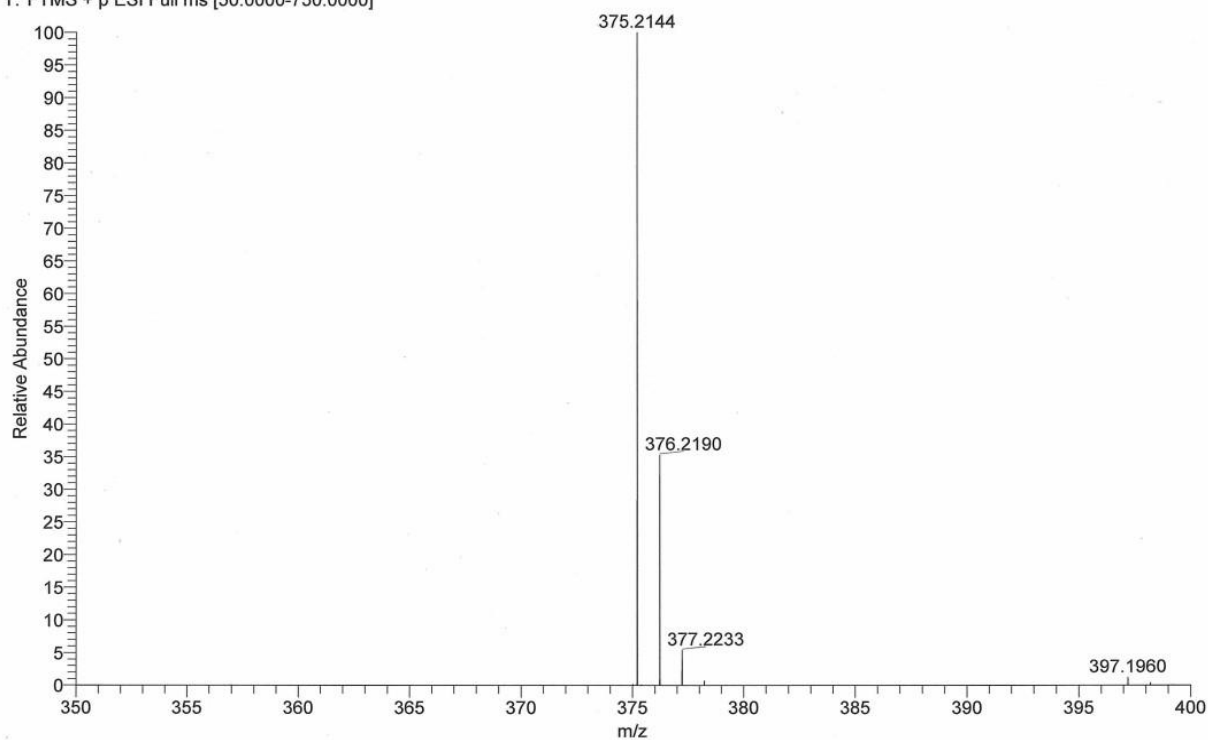

**Figure S42.** (+)-HRESIMS spectrum of mesonol F (**6**)

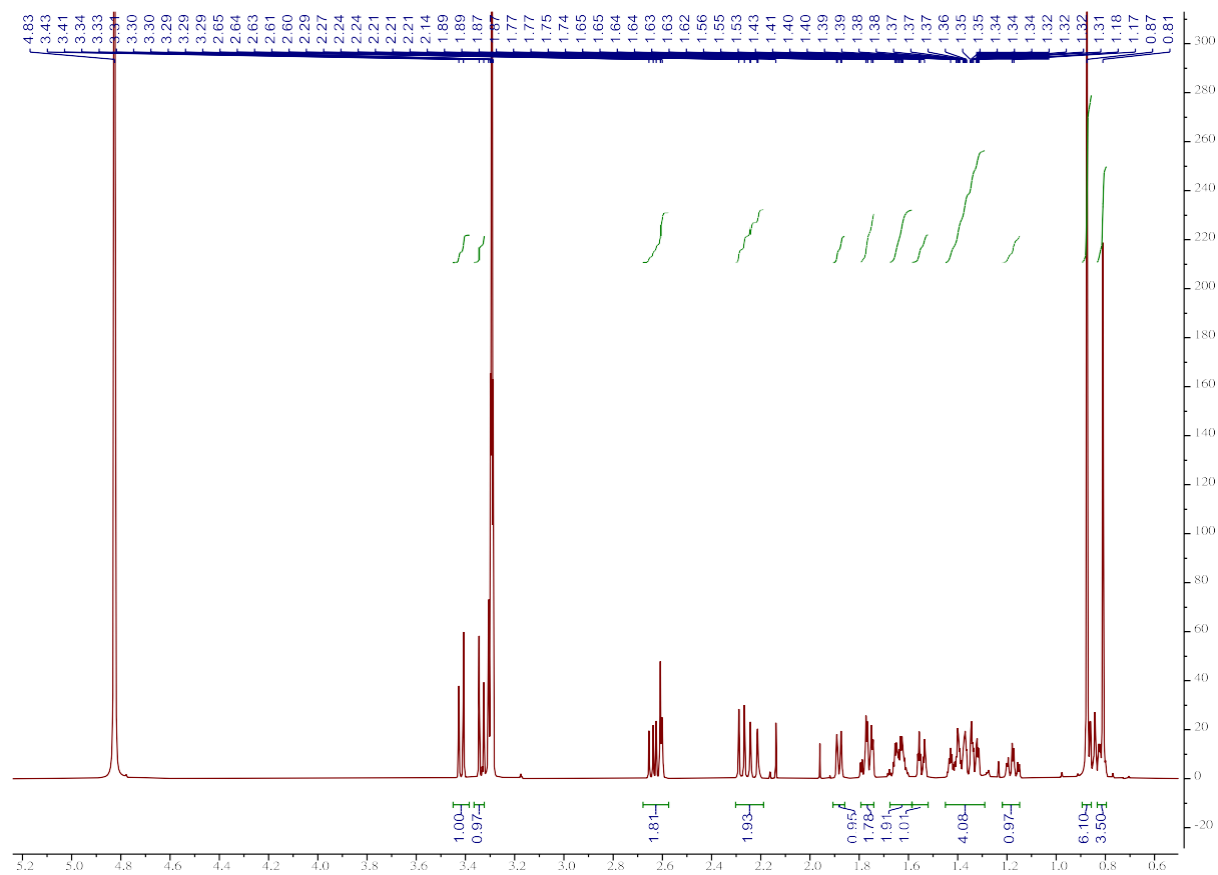

**Figure S43.**  $^1\text{H}$ -NMR spectrum of mesonol G (7) in  $\text{MeOD-}d_4$  (600MHz)

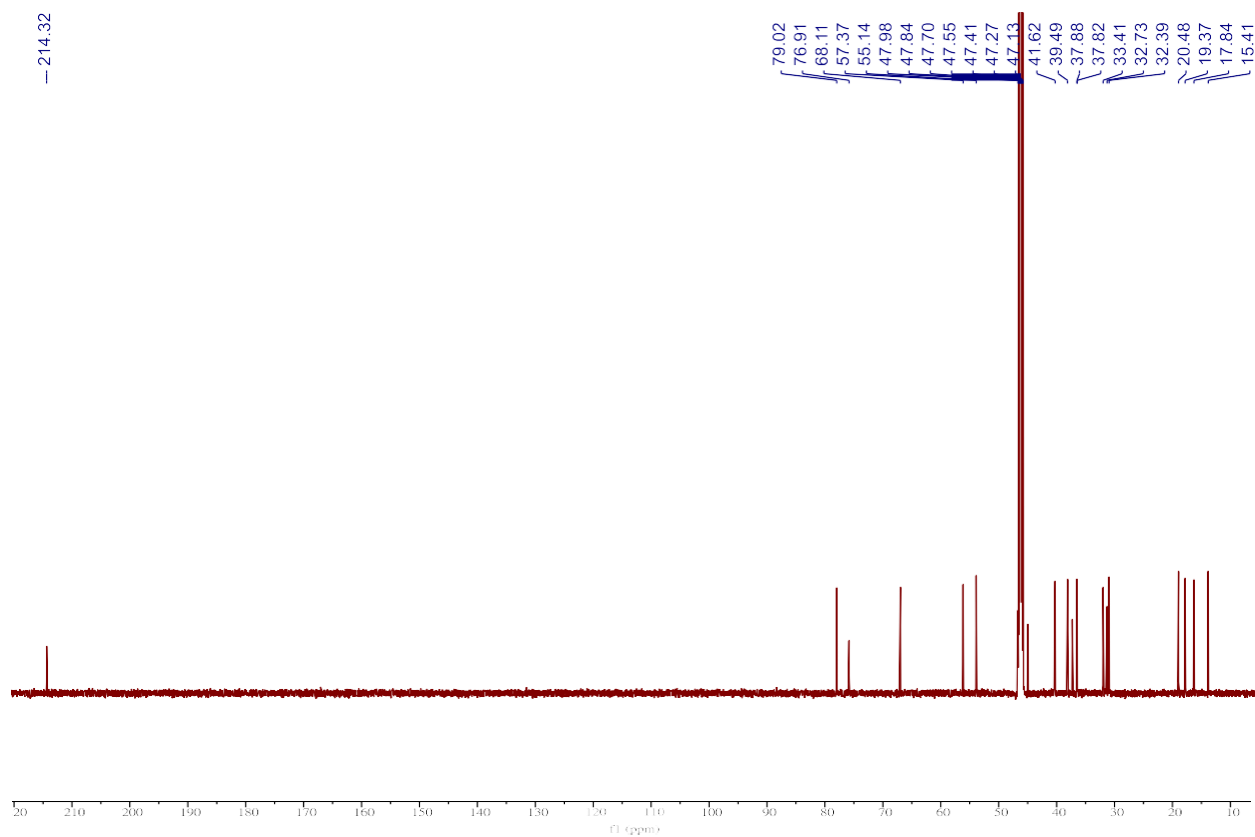

**Figure S44.**  $^{13}\text{C}$ -NMR spectrum of mesonol G (**7**) in  $\text{MeOD-}d_4$  (150MHz)



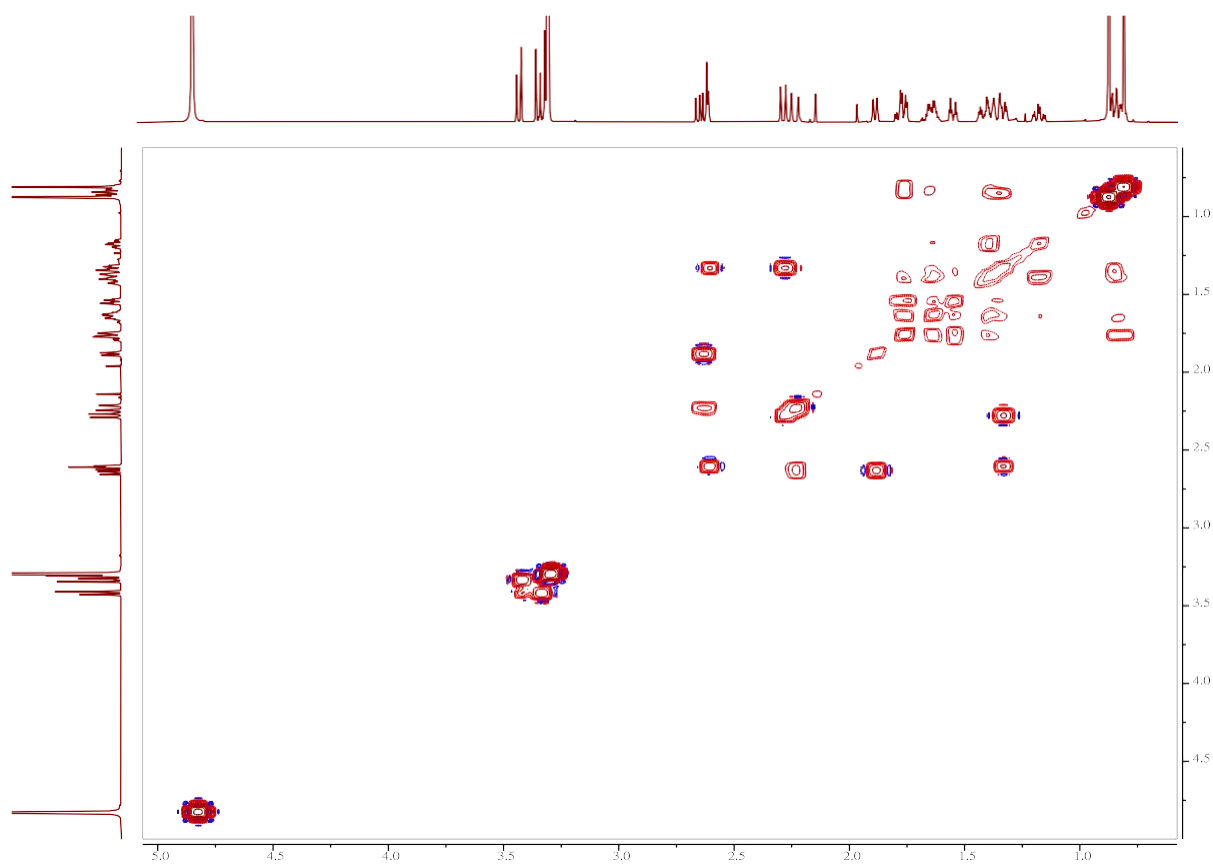

**Figure S45.** COSY spectrum of mesonol G (7)

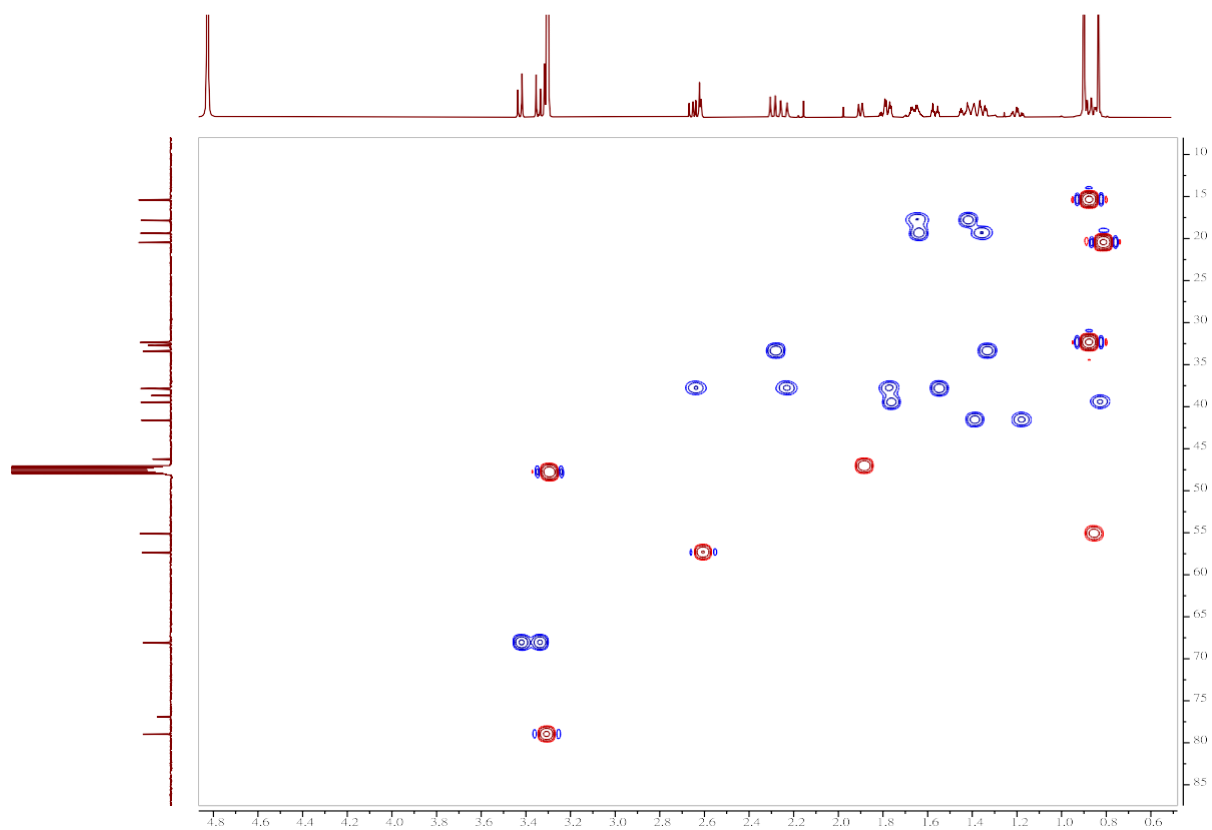

**Figure S46.** HSQC spectrum of mesonol G (7)

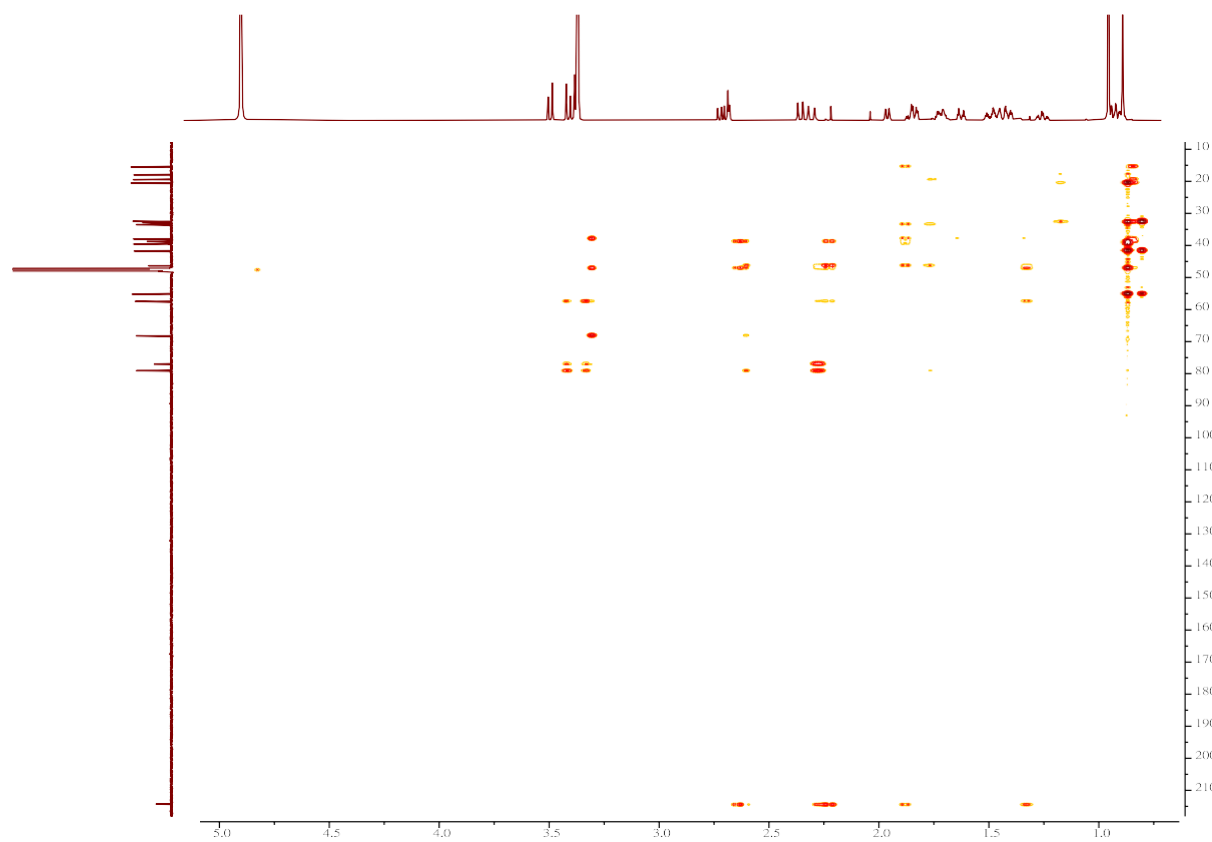

**Figure S47.** HMBC spectrum of mesonol G (**7**)

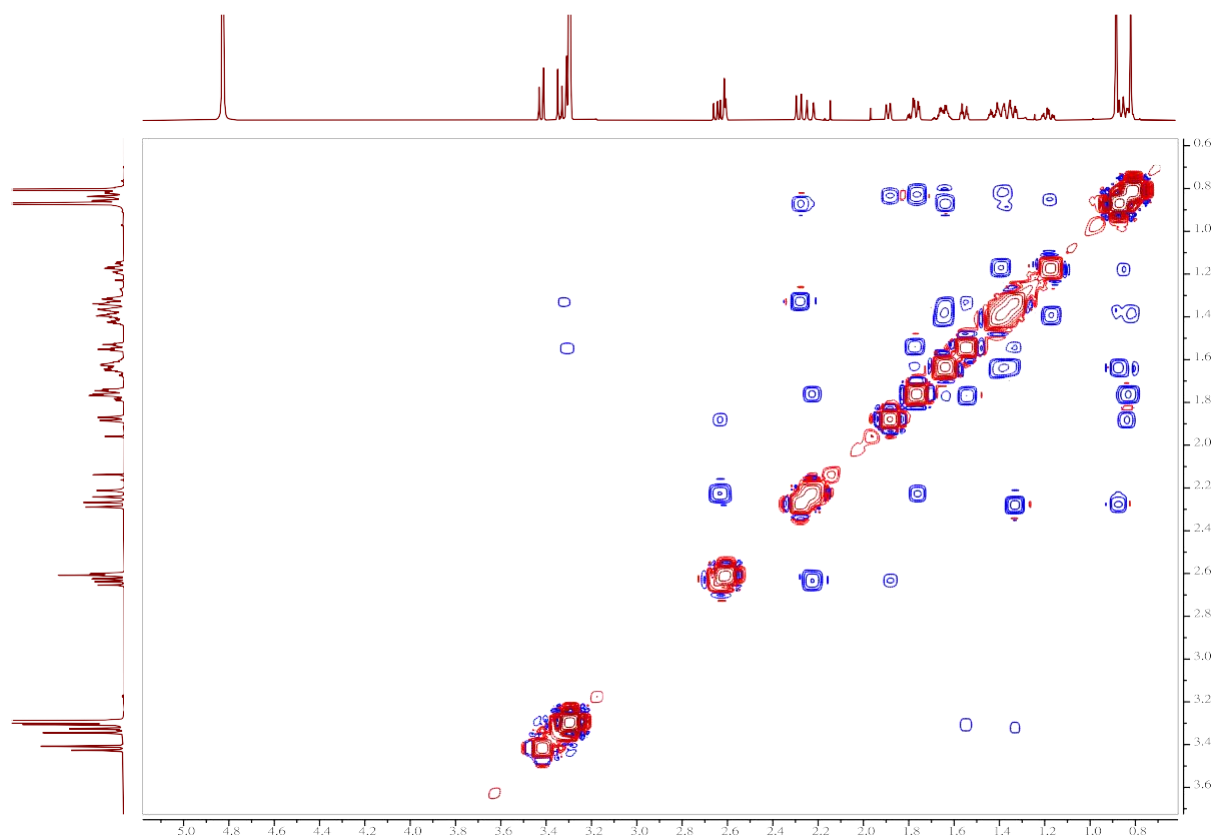

**Figure S48.** NOESY spectrum of mesonol G (7)

PPD19421 #123 RT: 1.19 AV: 1 NL: 9.27E7  
T: FTMS + p ESI Full ms [50.0000-750.0000]

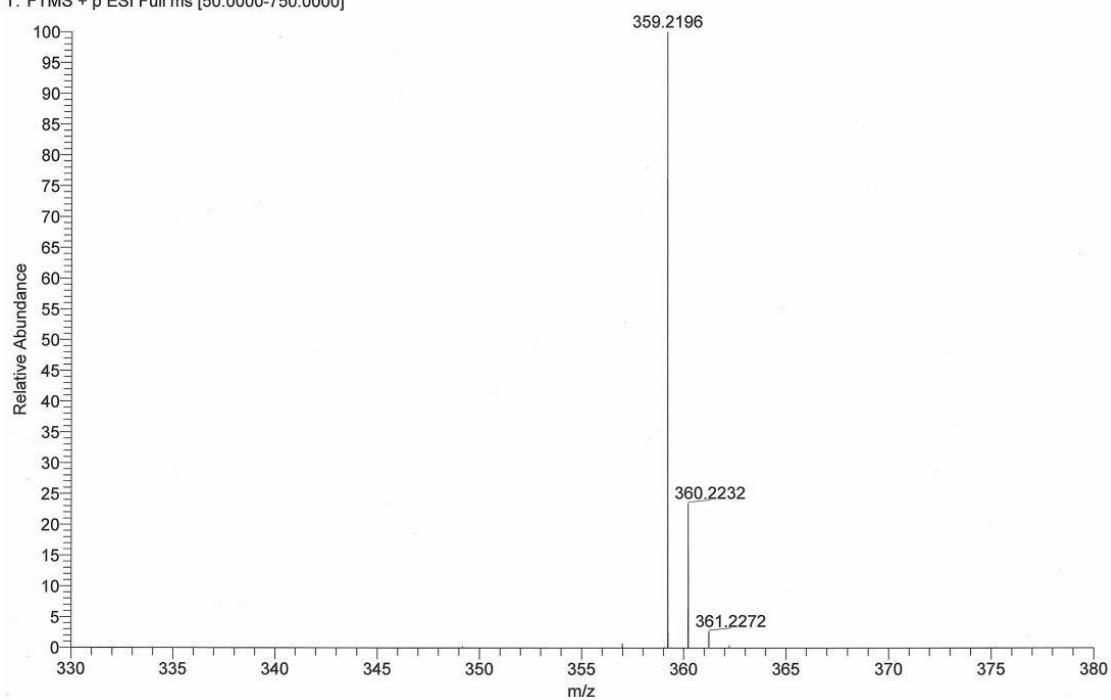

**Figure S49.** (+)-HRESIMS spectrum of mesonol G (**7**)

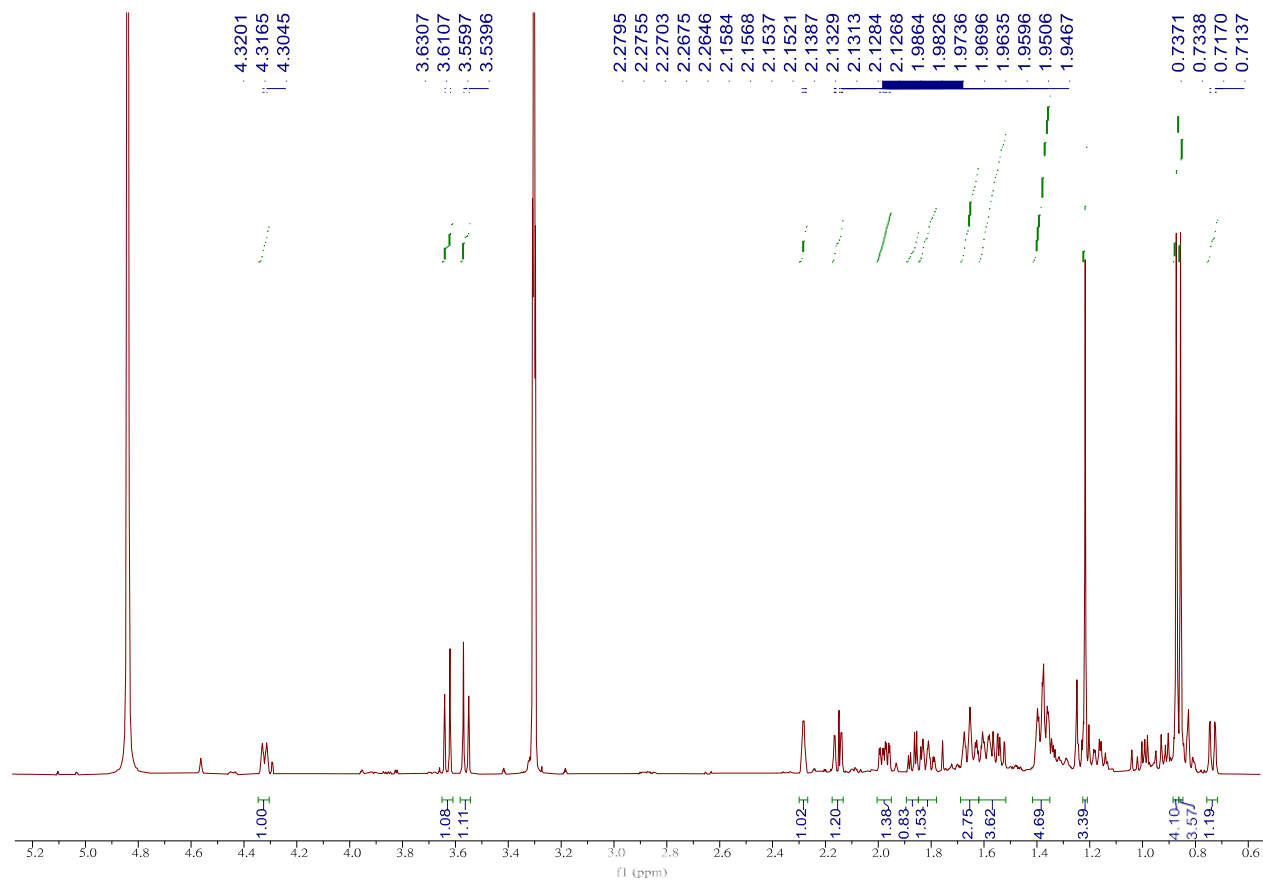

**Figure S50.**  $^1\text{H}$ -NMR spectrum of mesonol H (**8**) in  $\text{MeOD-}d_4$  (600 MHz)

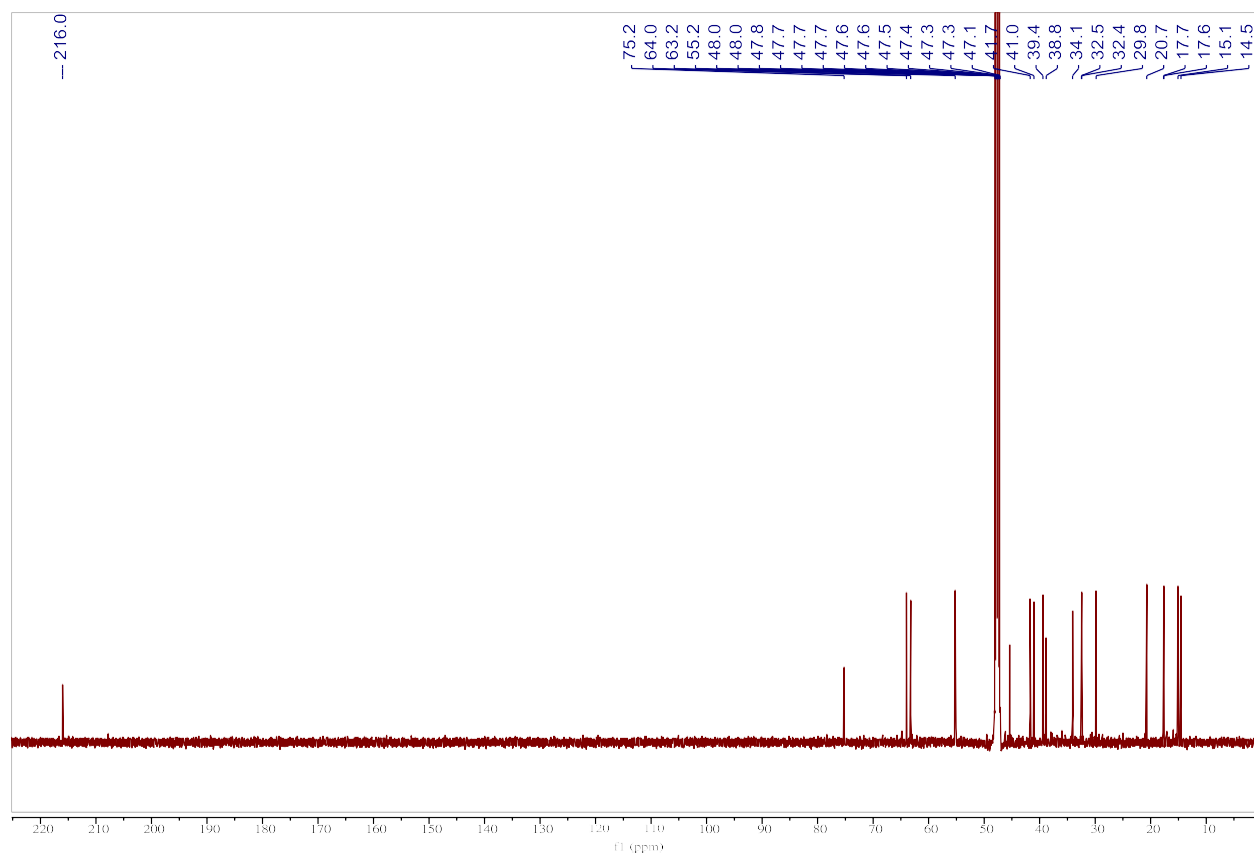

**Figure S51.**  $^{13}\text{C}$ -NMR spectrum of mesonol H (**8**) in  $\text{MeOD-}d_4$  (150 MHz)

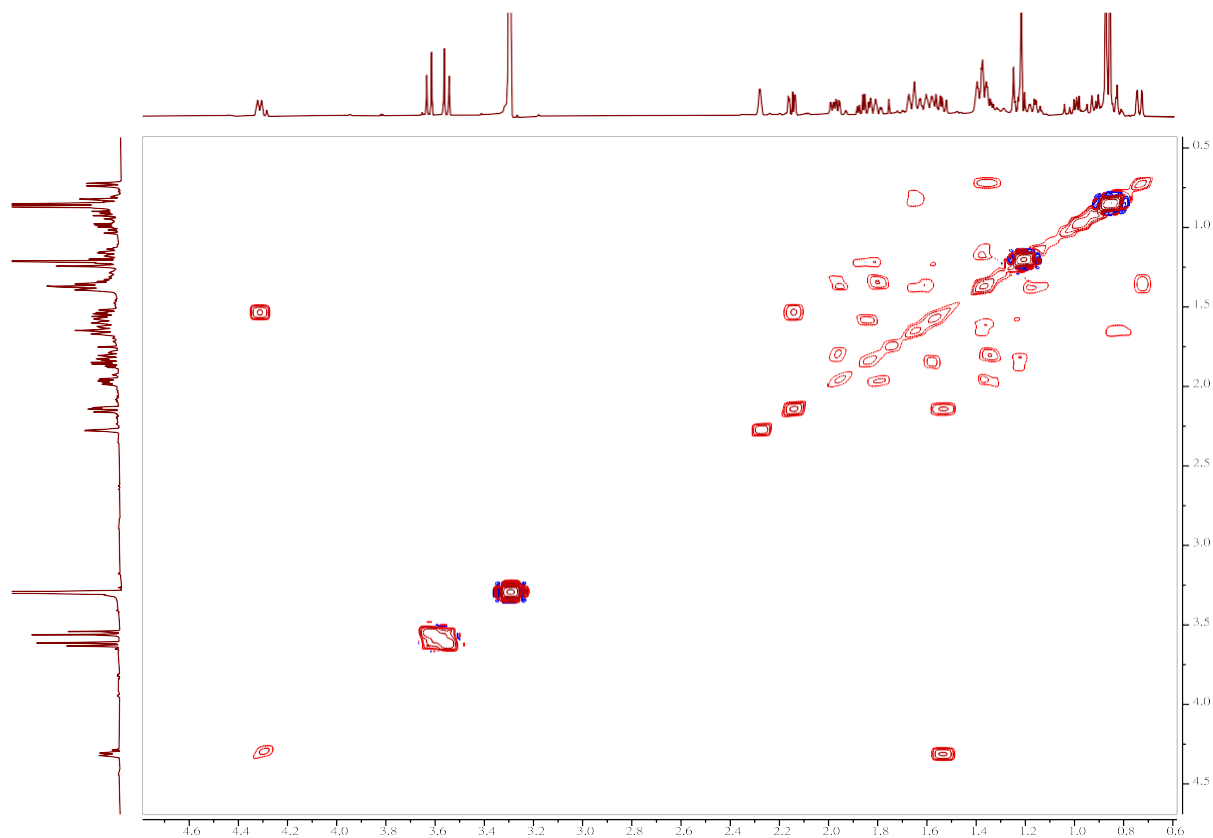

**Figure S52.** COSY spectrum of mesonol H (8)



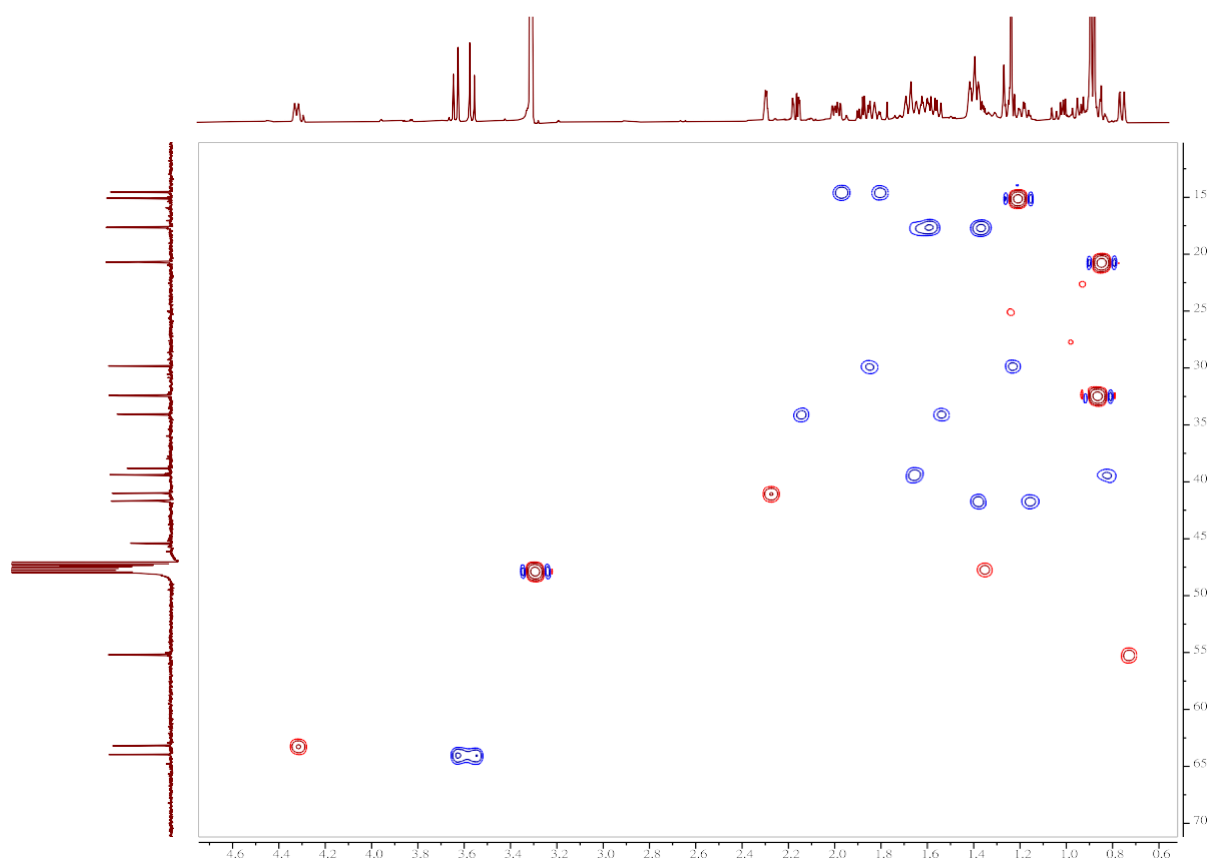

**Figure S53.** HSQC spectrum of mesonol H (**8**)

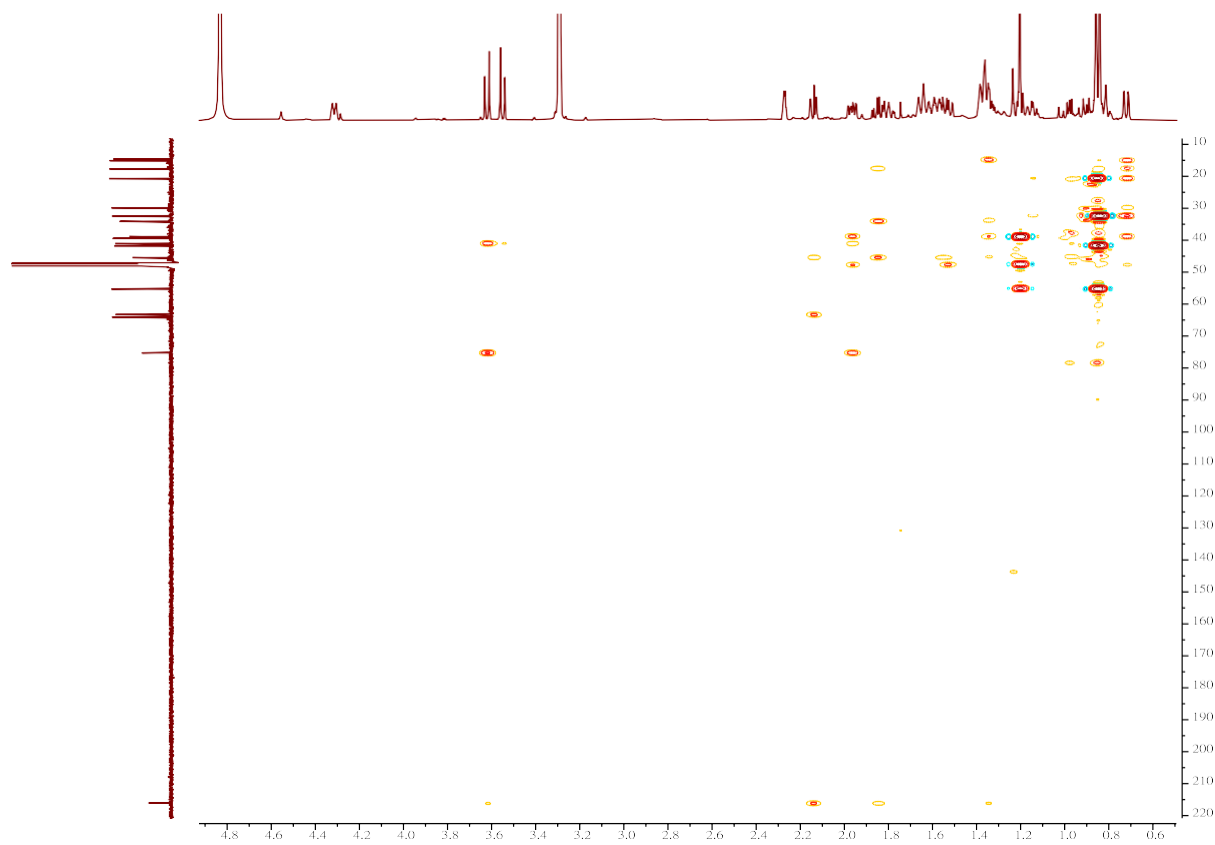

**Figure S54.** HMBC spectrum of mesonol H (**8**)

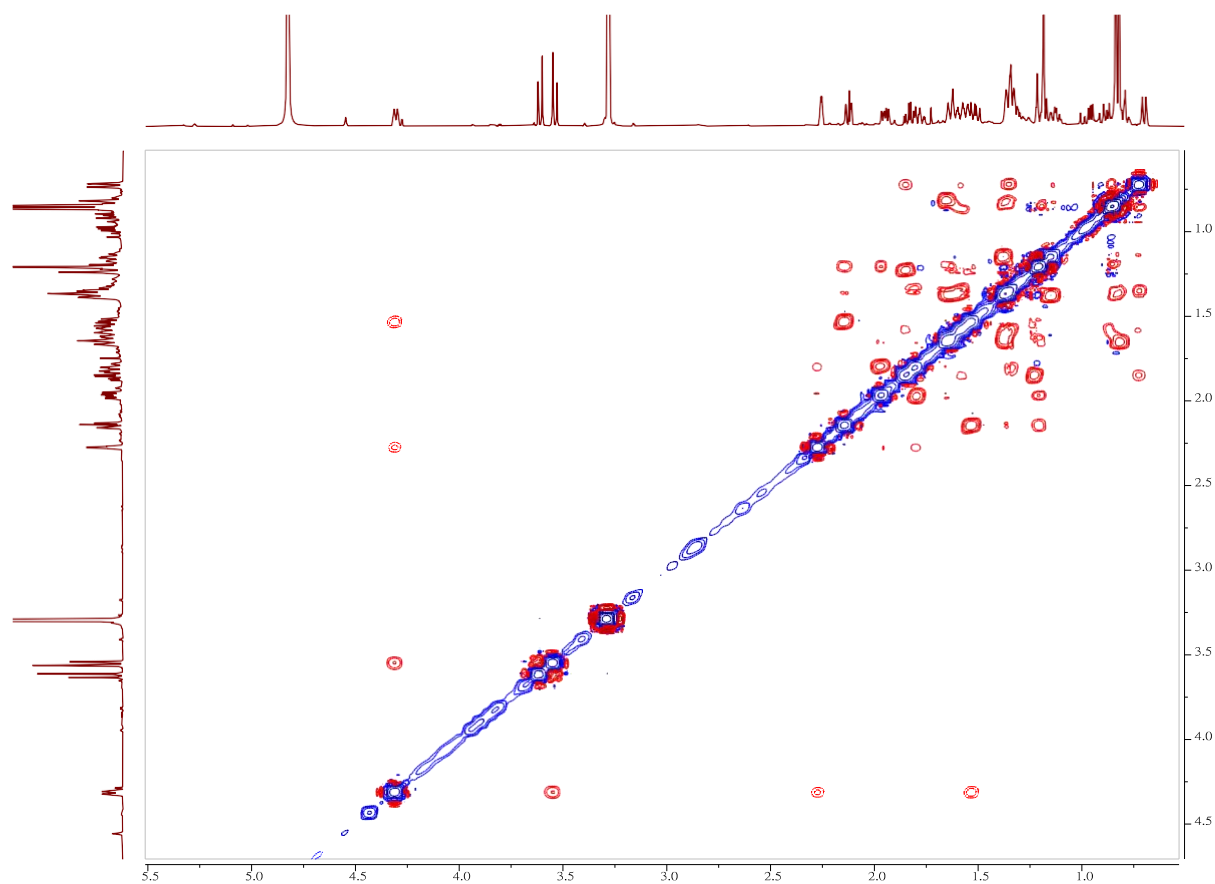

**Figure S55.** NOESY spectrum of mesonol H (**8**)

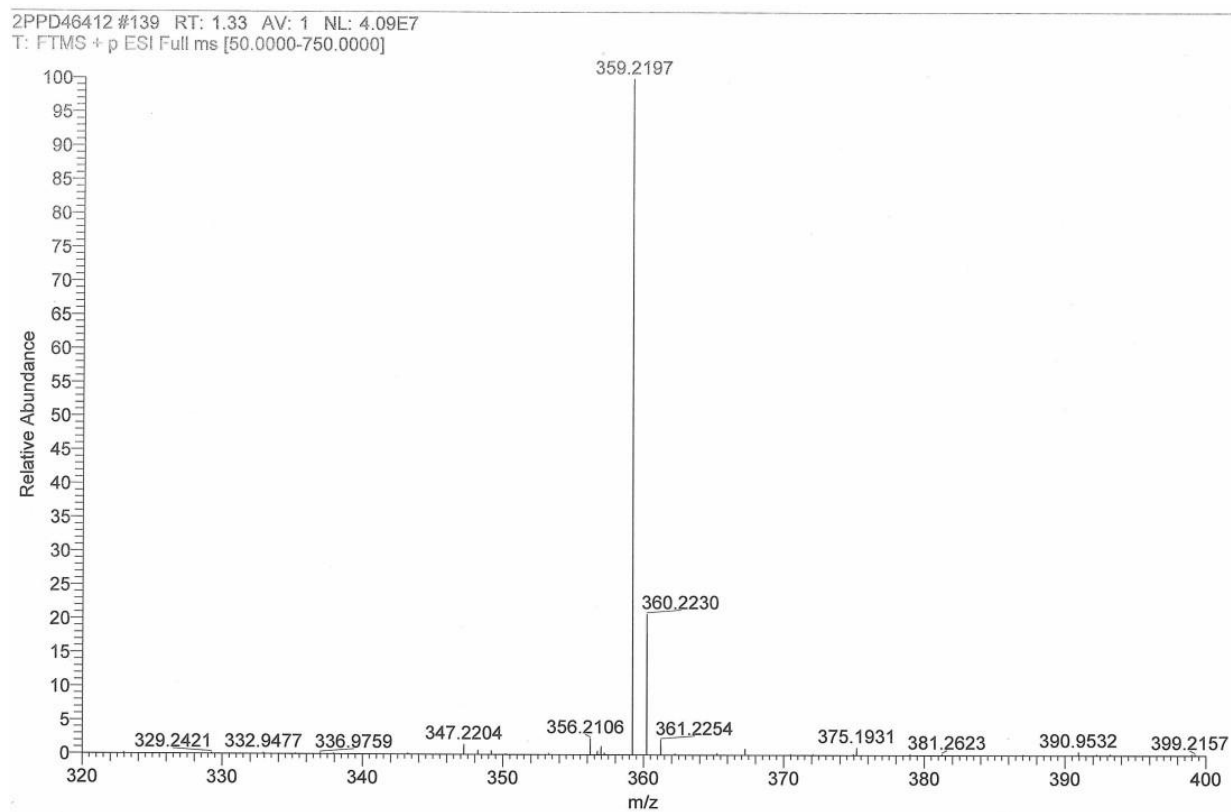

**Figure S56.** (+)-HRESIMS spectrum of mesonol H (**8**)

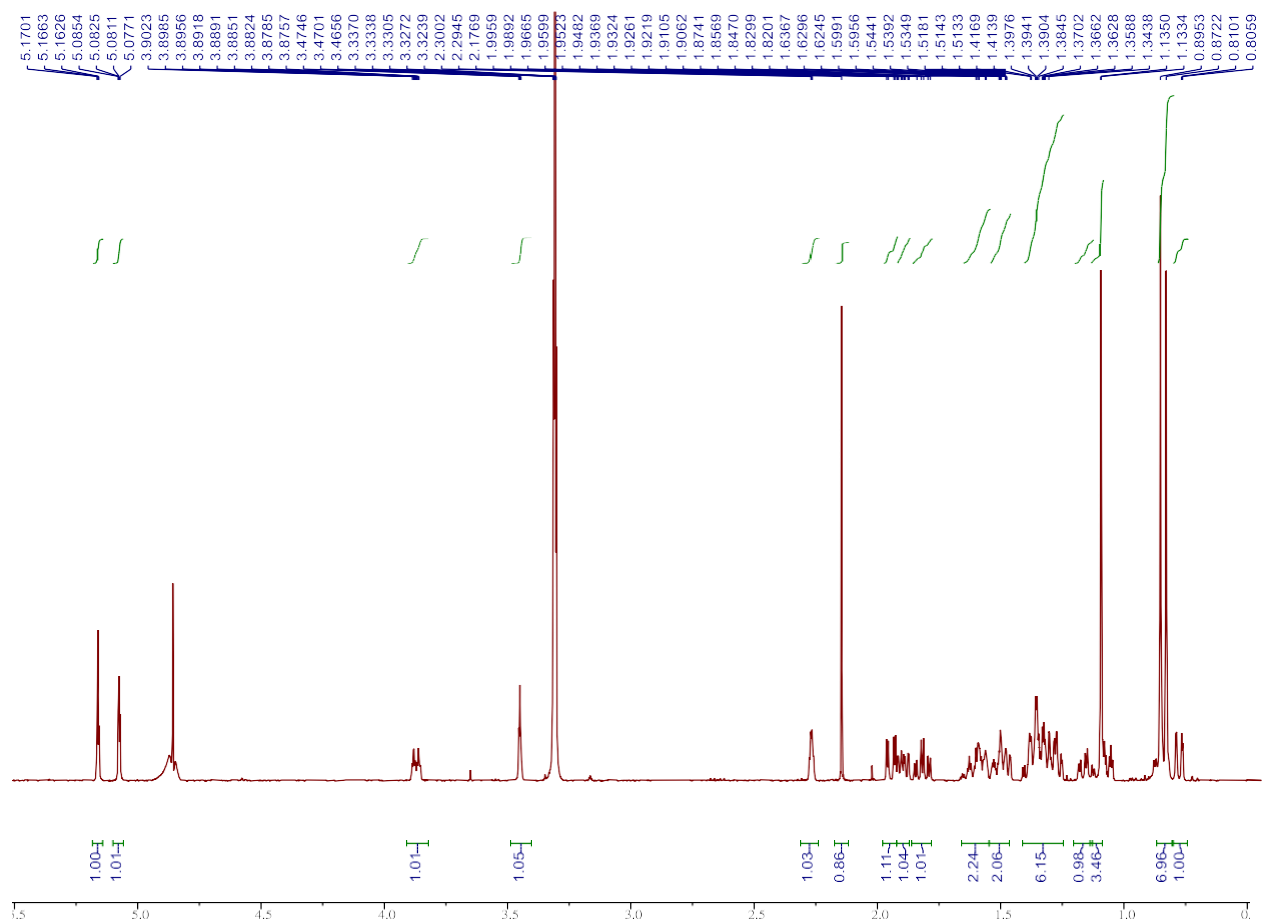

**Figure S57.**  $^1\text{H}$ -NMR spectrum of mesonol I (**9**) in  $\text{MeOD-}d_4$  (500MHz)

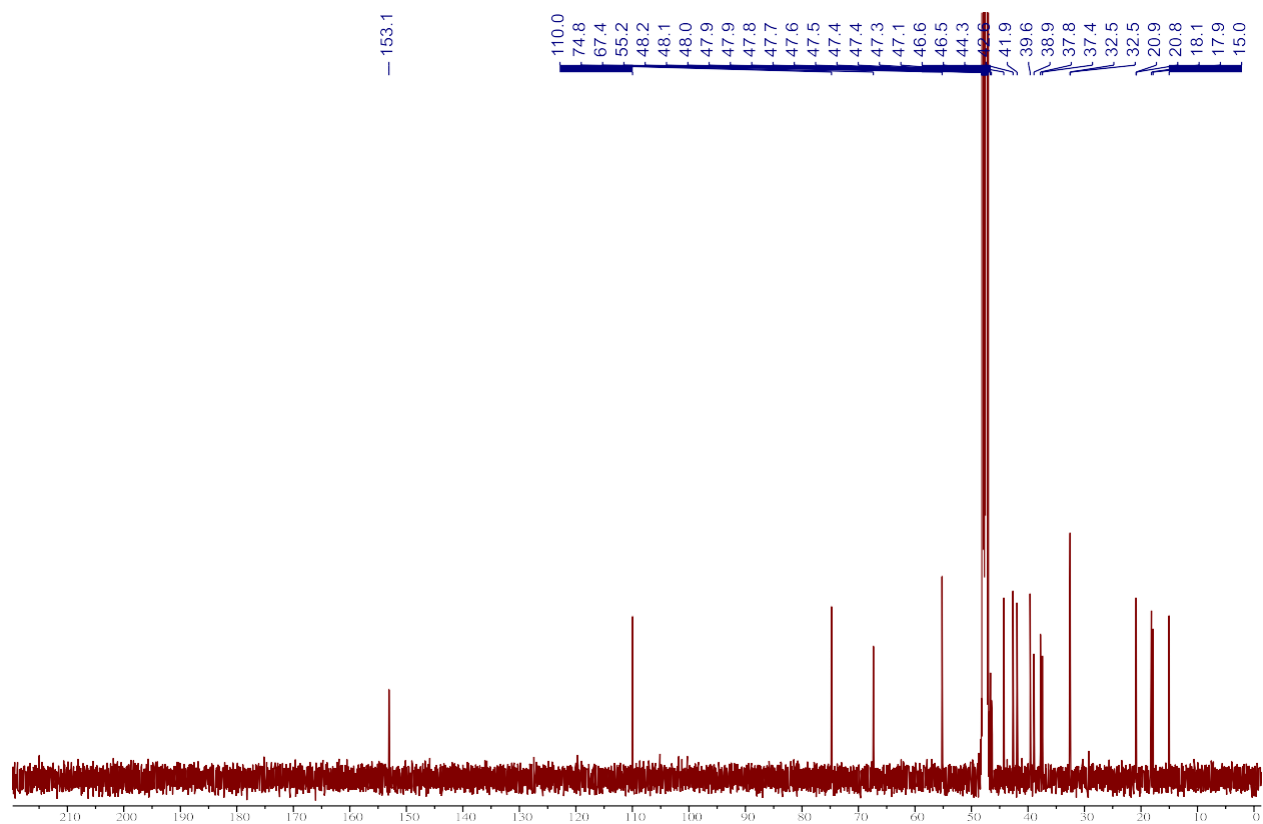

**Figure S58.**  $^{13}\text{C}$ -NMR spectrum of mesonol I (**9**) in  $\text{MeOD-}d_4$  (125 MHz)

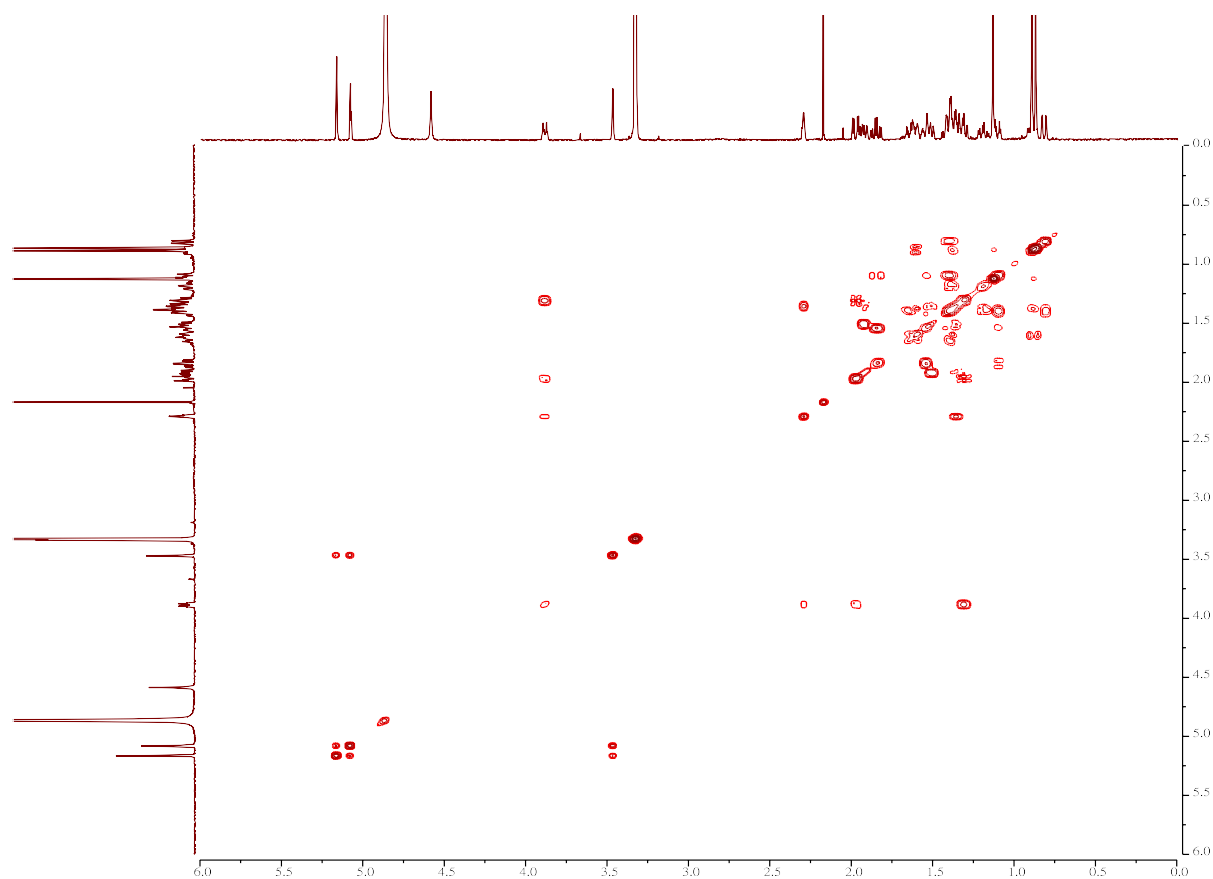

**Figure S59.** COSY spectrum of mesonol I (**9**)

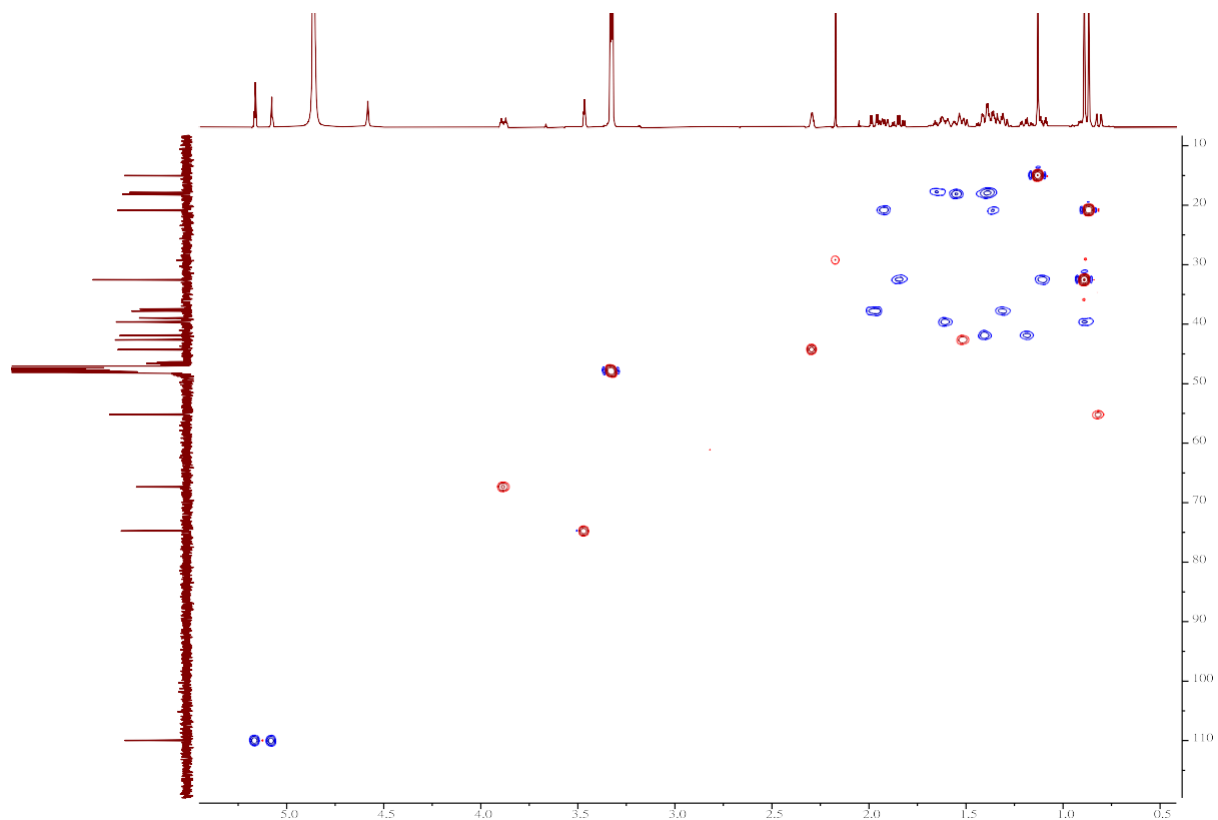

**Figure S60.** HSQC spectrum of mesonol I (**9**)



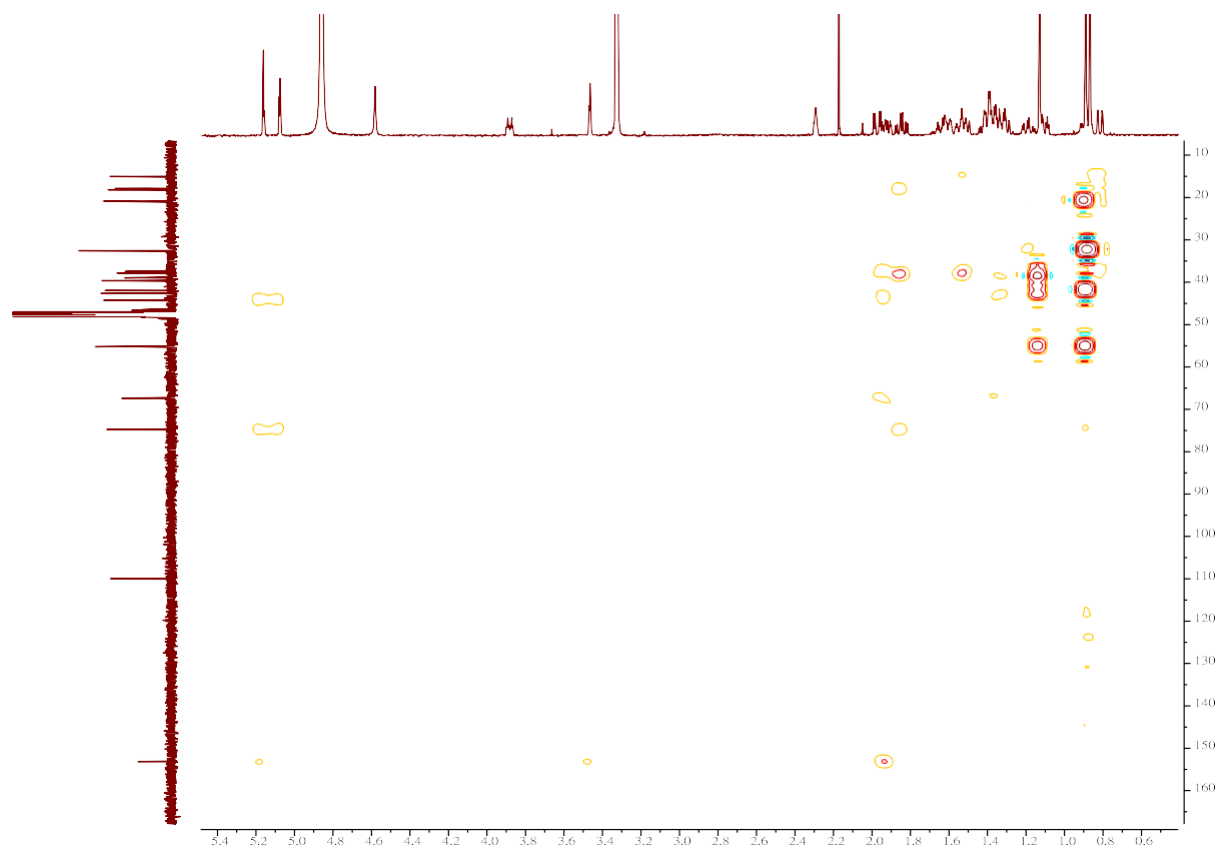

**Figure S61.** HMBC spectrum of mesonol I (**9**)

PPD18651\_200622145412 #124 RT: 1.20 AV: 1 NL: 7.81E6  
T: FTMS - p ESI Full ms [50.0000-750.0000]

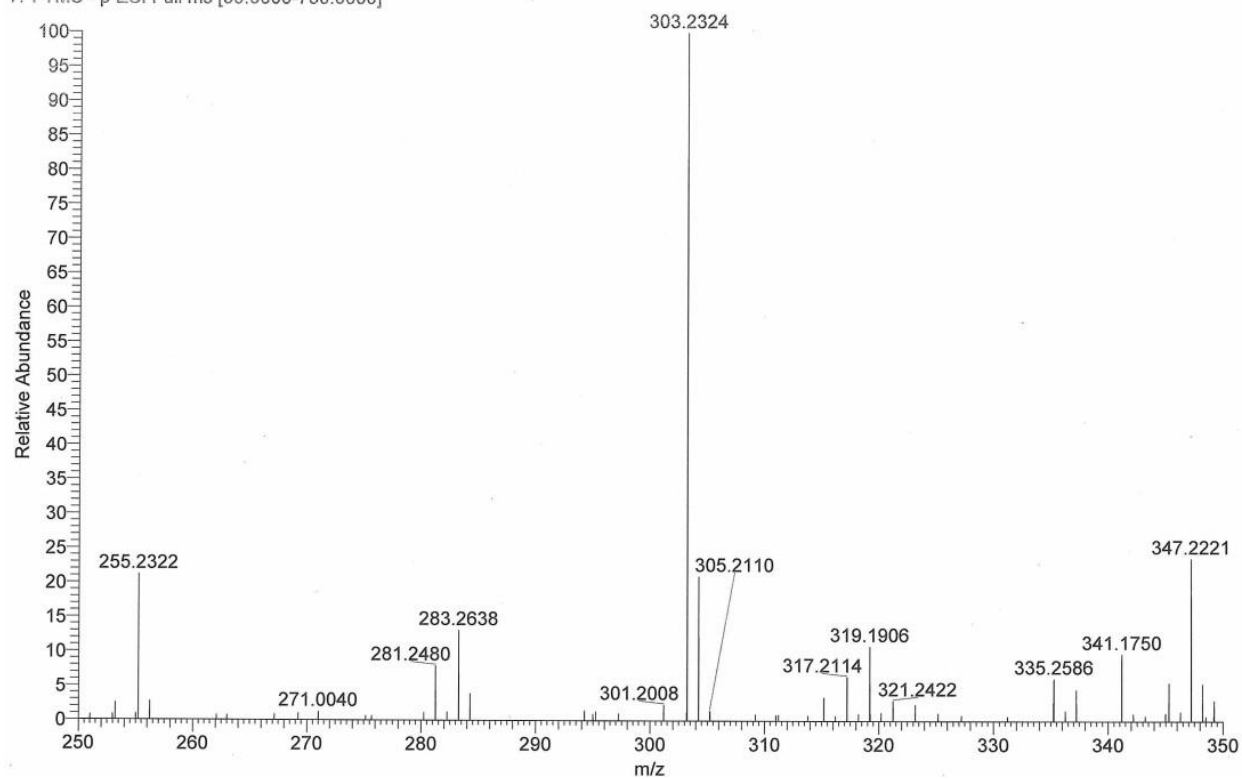

**Figure S62.** (–)-HRESIMS spectrum of mesonol I (**9**)

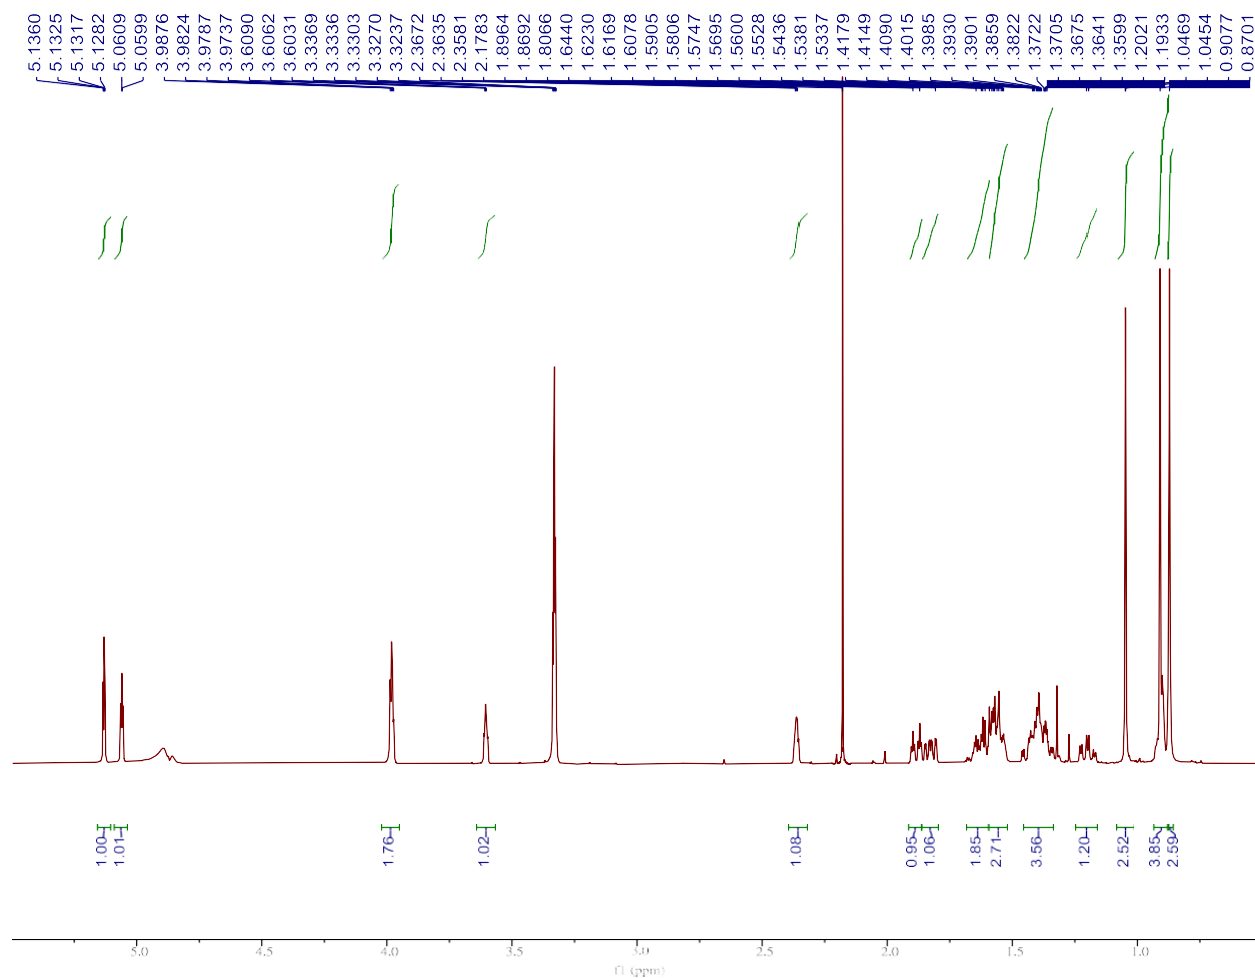

**Figure S63.** <sup>1</sup>H-NMR spectrum of mesonol J (**10**) in MeOD-*d*<sub>4</sub> (500MHz)

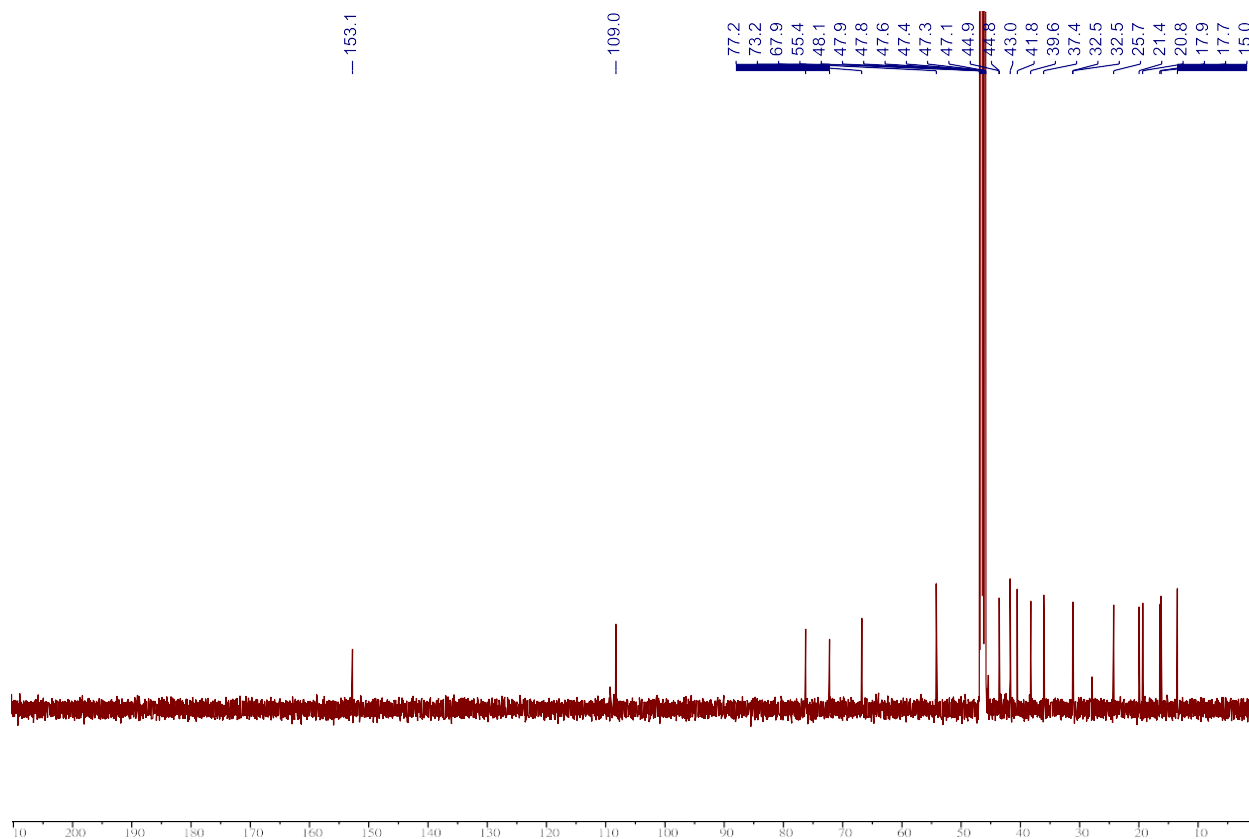

**Figure S64.** <sup>13</sup>C-NMR spectrum of mesonol J (**10**) in MeOD-*d*<sub>4</sub> (125 MHz)

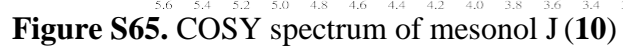

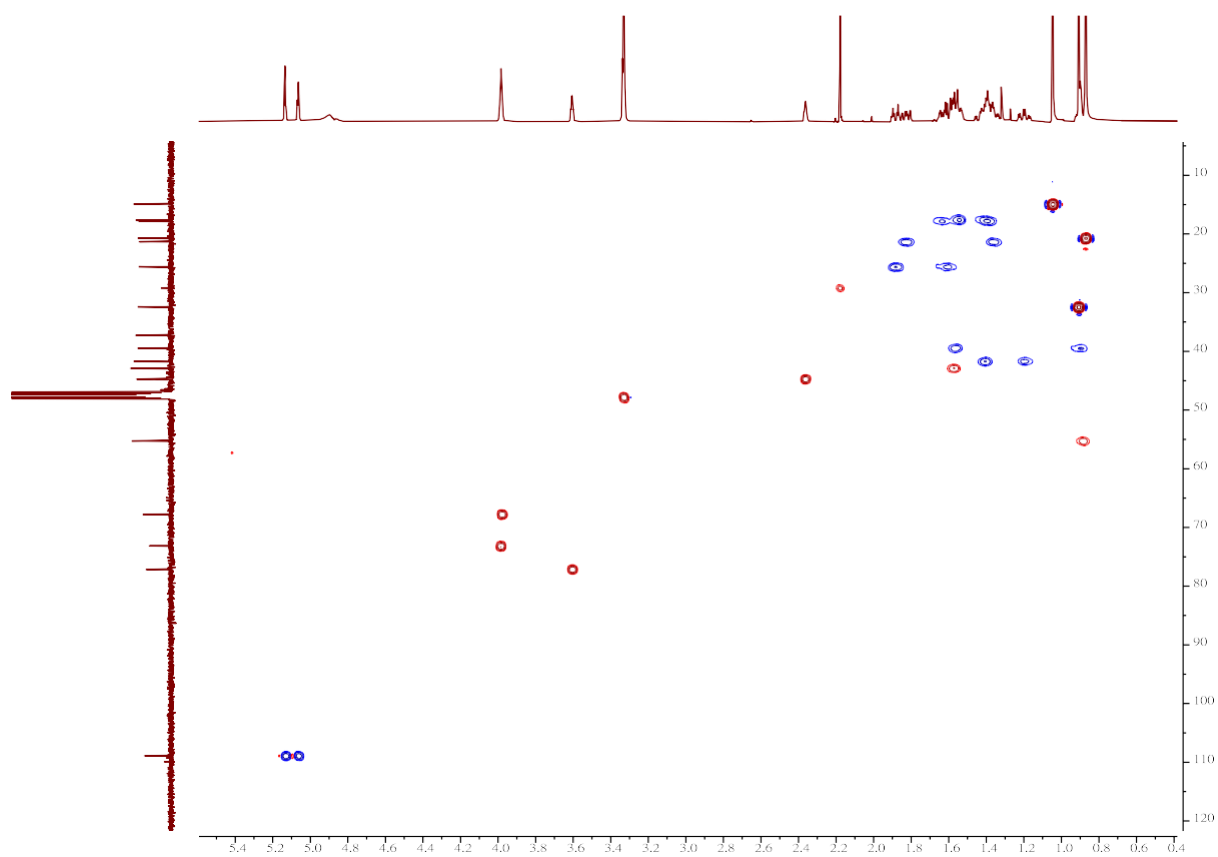

**Figure S66.** HSQC spectrum of mesonol J (**10**)

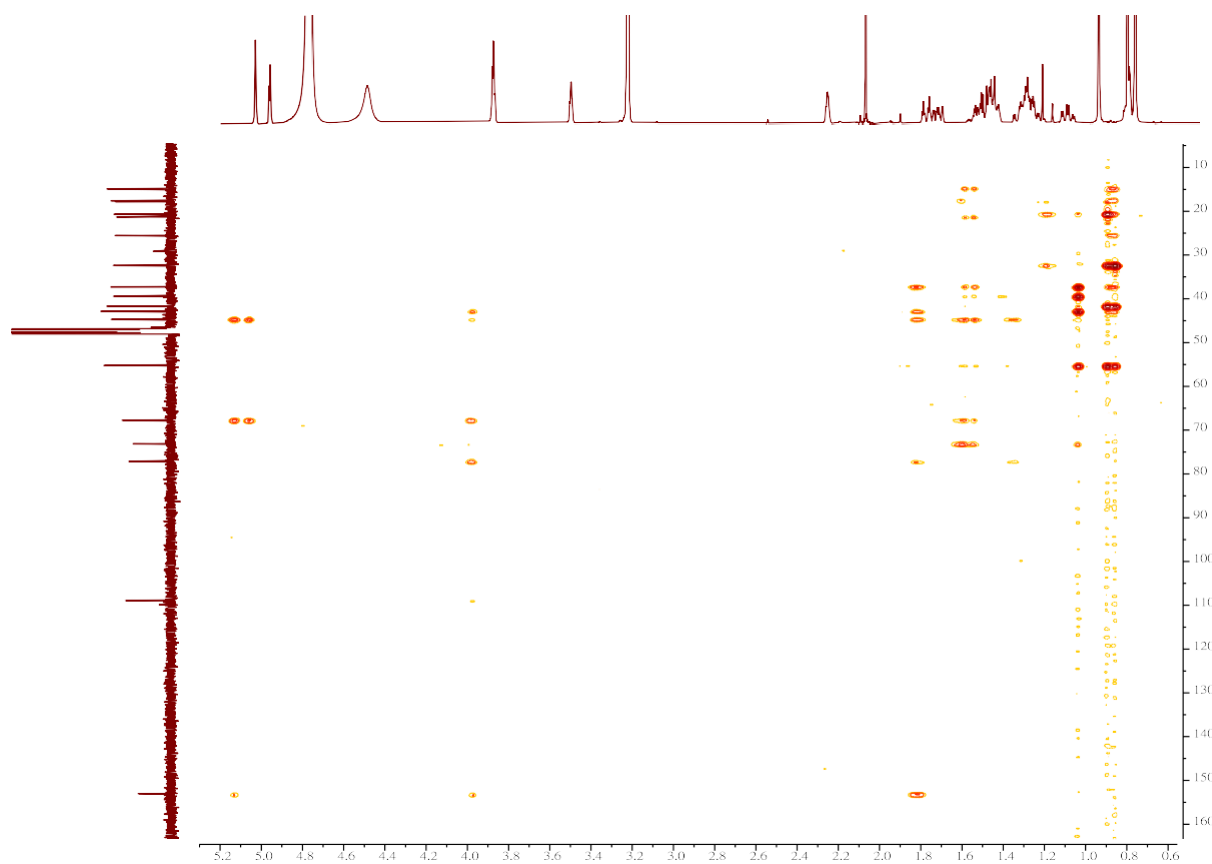

**Figure S67.** HMBC spectrum of mesonol J (**10**)

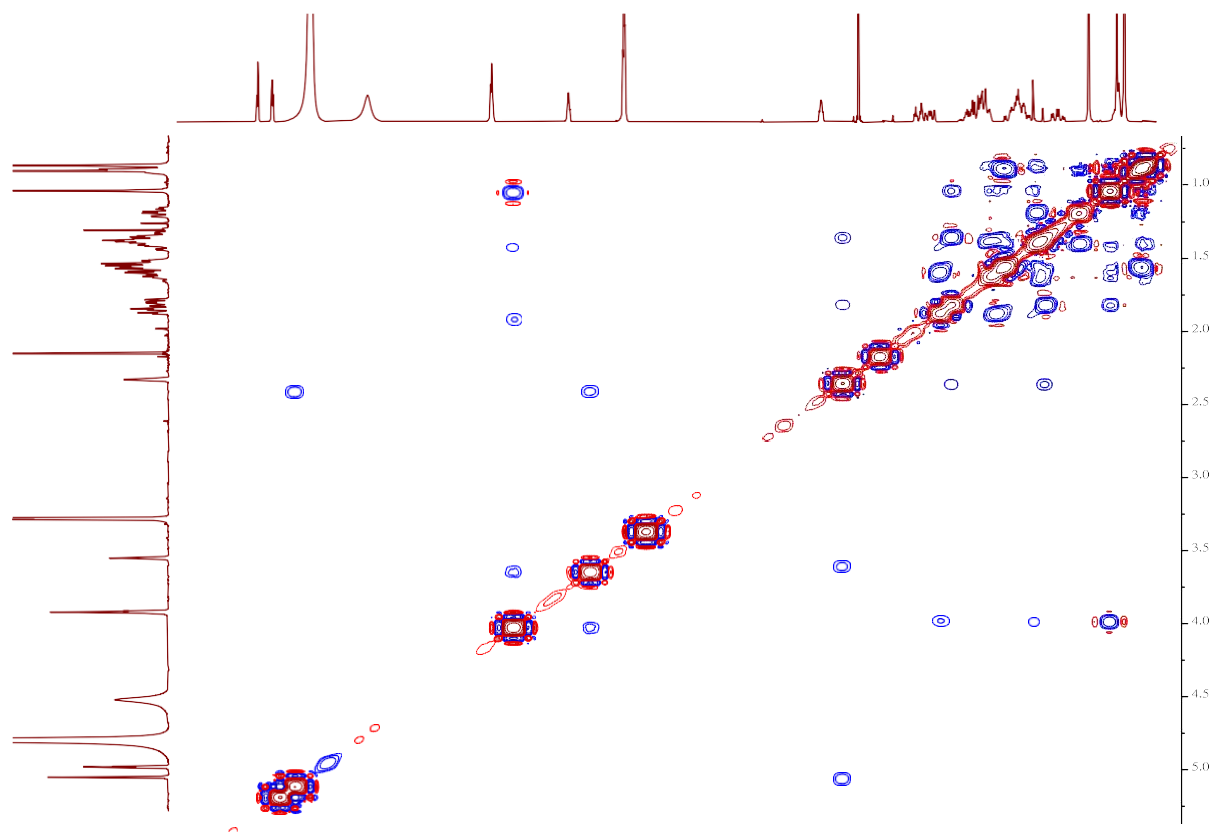

**Figure S68.** NOESY spectrum of mesonol J (**10**)



PPD184321 #114 RT: 1.10 AV: 1 NL: 9.30E7  
T: FTMS - p ESI Full ms [50.0000-750.0000]

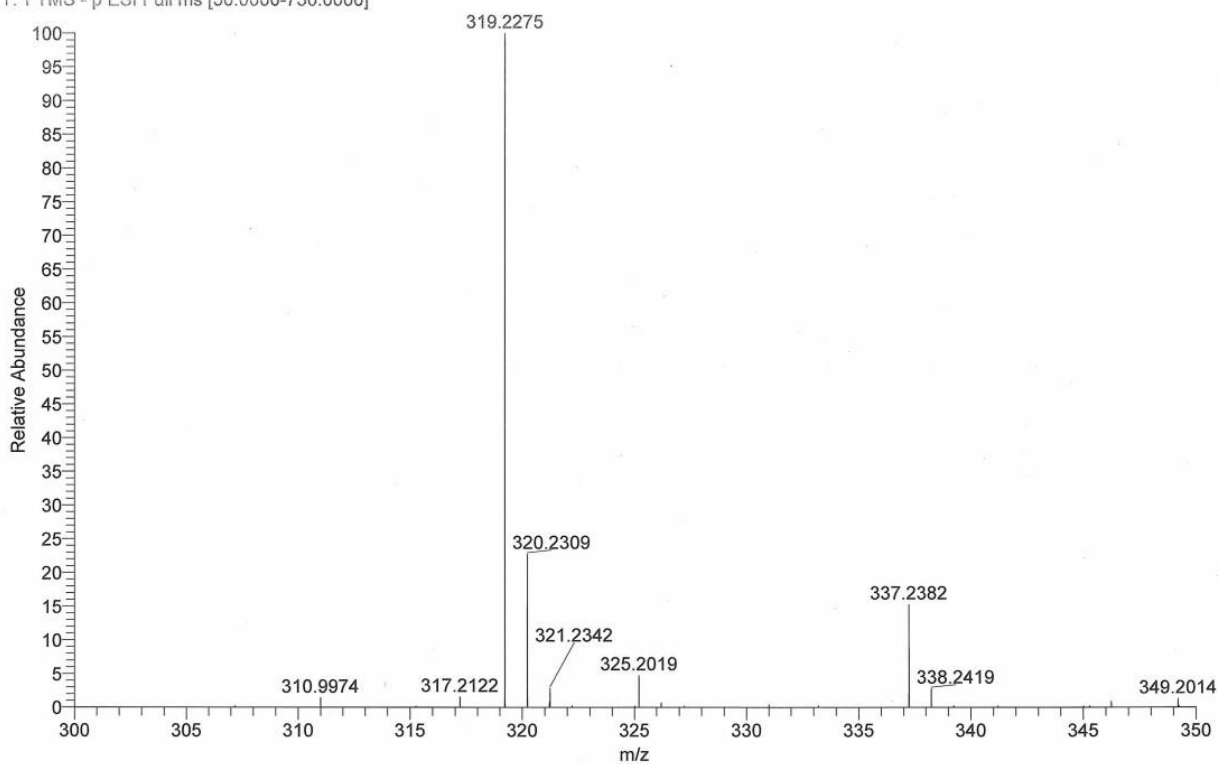

**Figure S69.** (–)-HRESIMS spectrum of mesonol J (**10**)

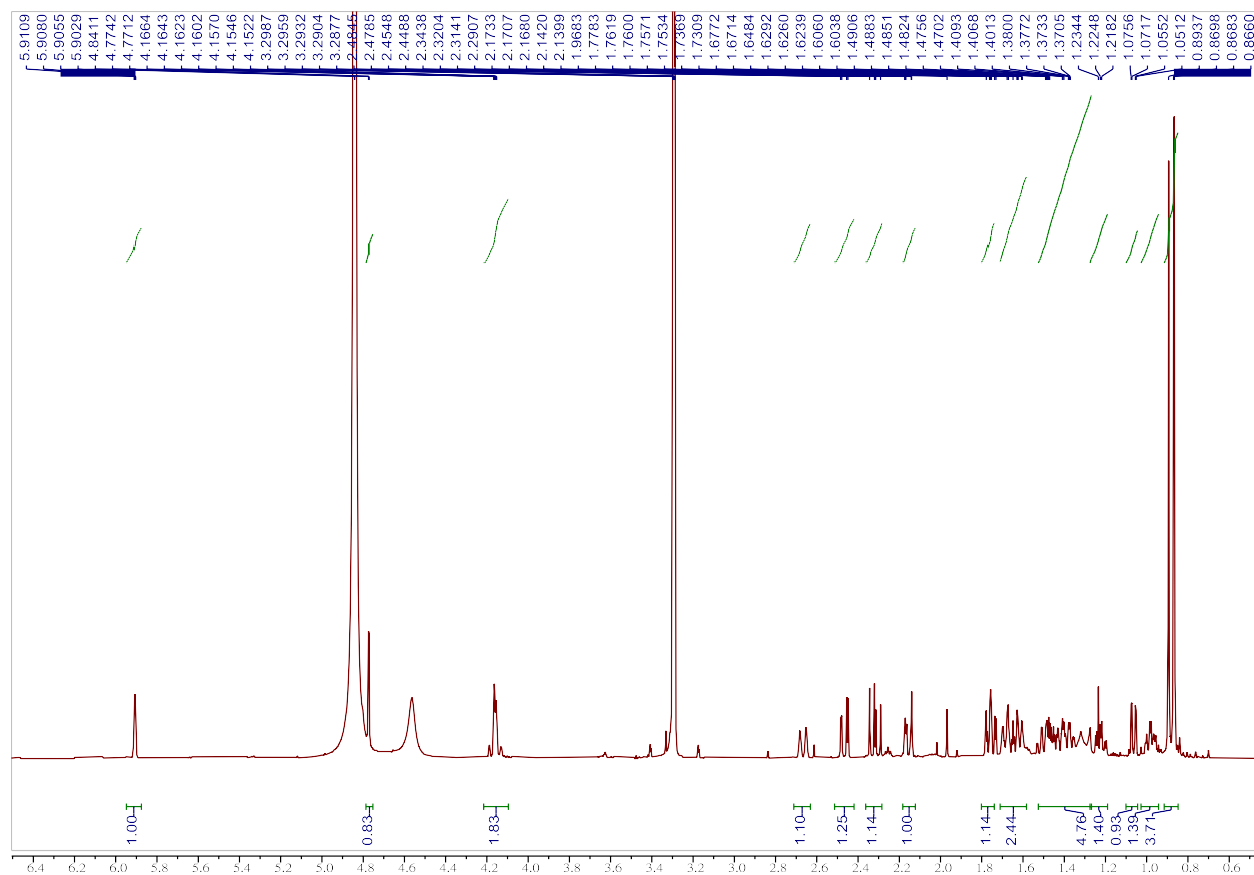

**Figure S70.**  $^1\text{H}$ -NMR spectrum of mesonol K (**11**) in  $\text{MeOD-}d_4$  (600 MHz)

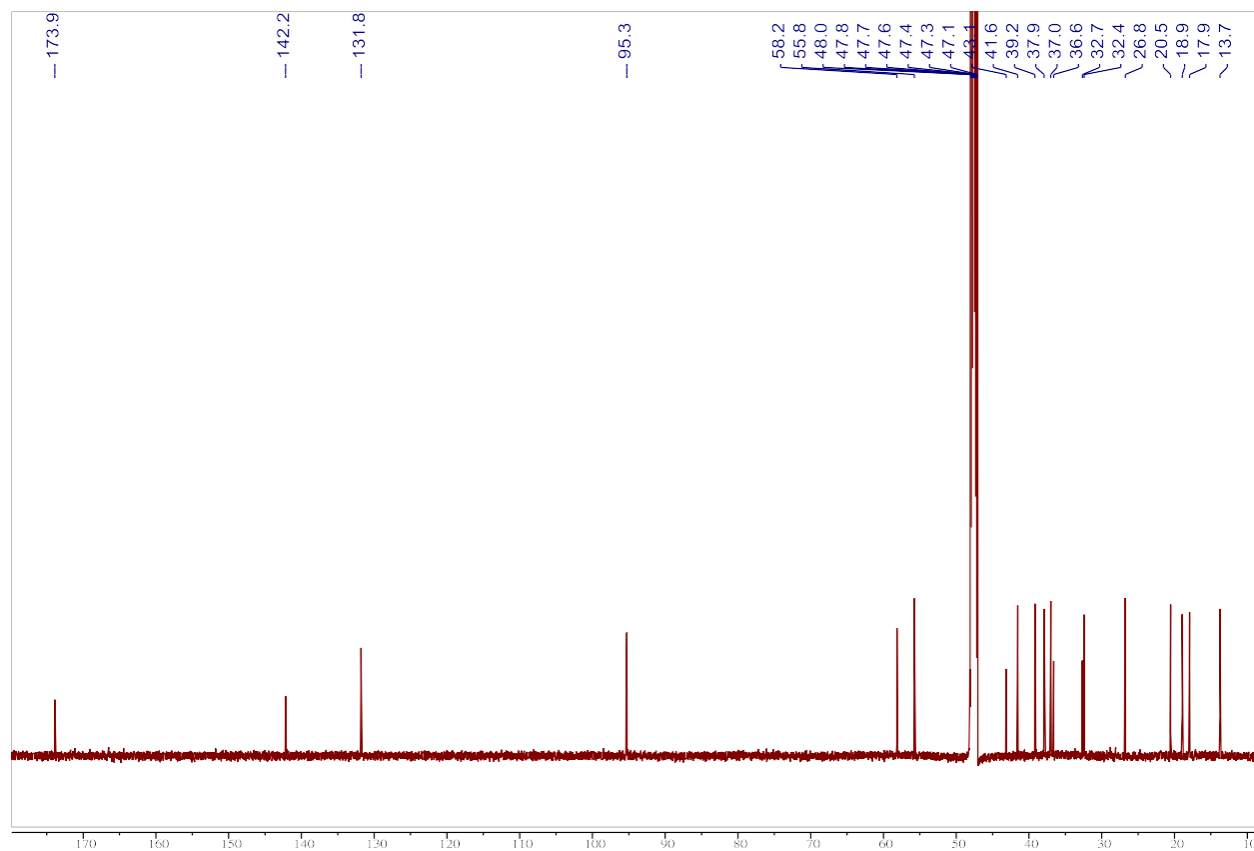

**Figure S71.** <sup>13</sup>C-NMR spectrum of mesonol K (**11**) in MeOD-*d*<sub>4</sub> (150 MHz)

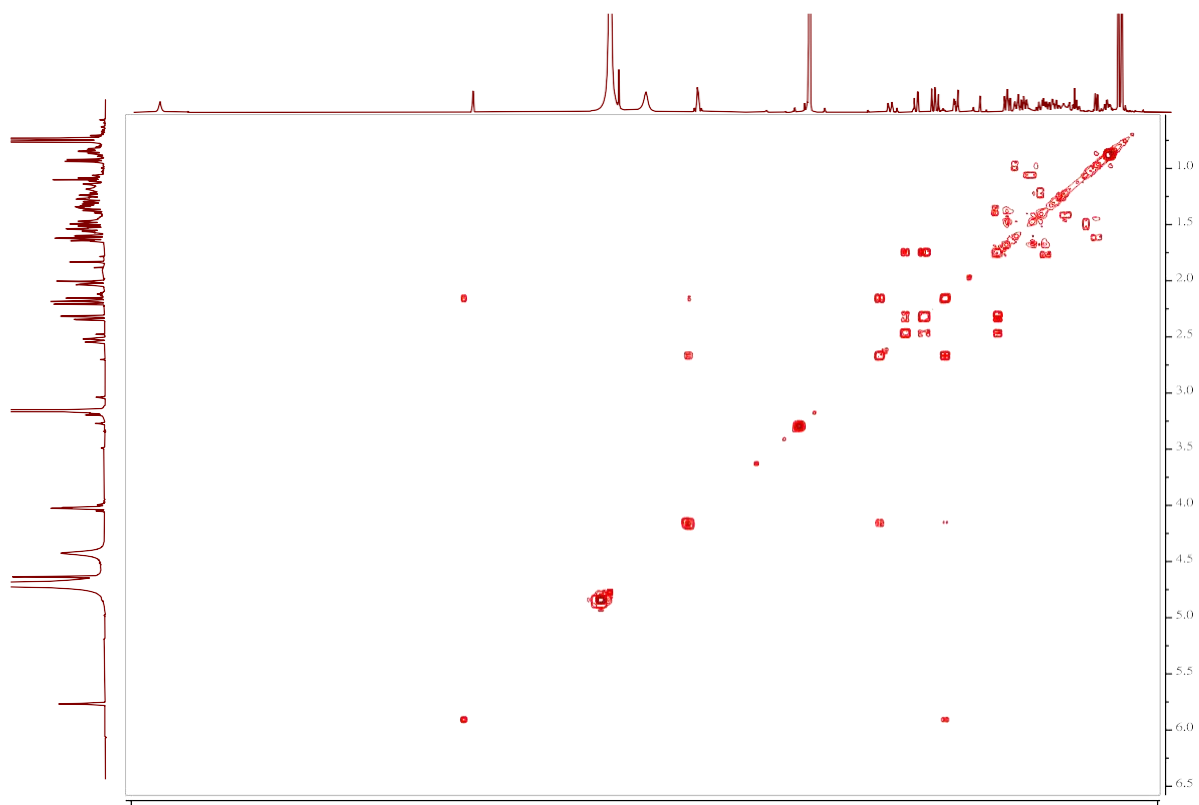

**Figure S72.** COSY spectrum of mesonol K (**11**)

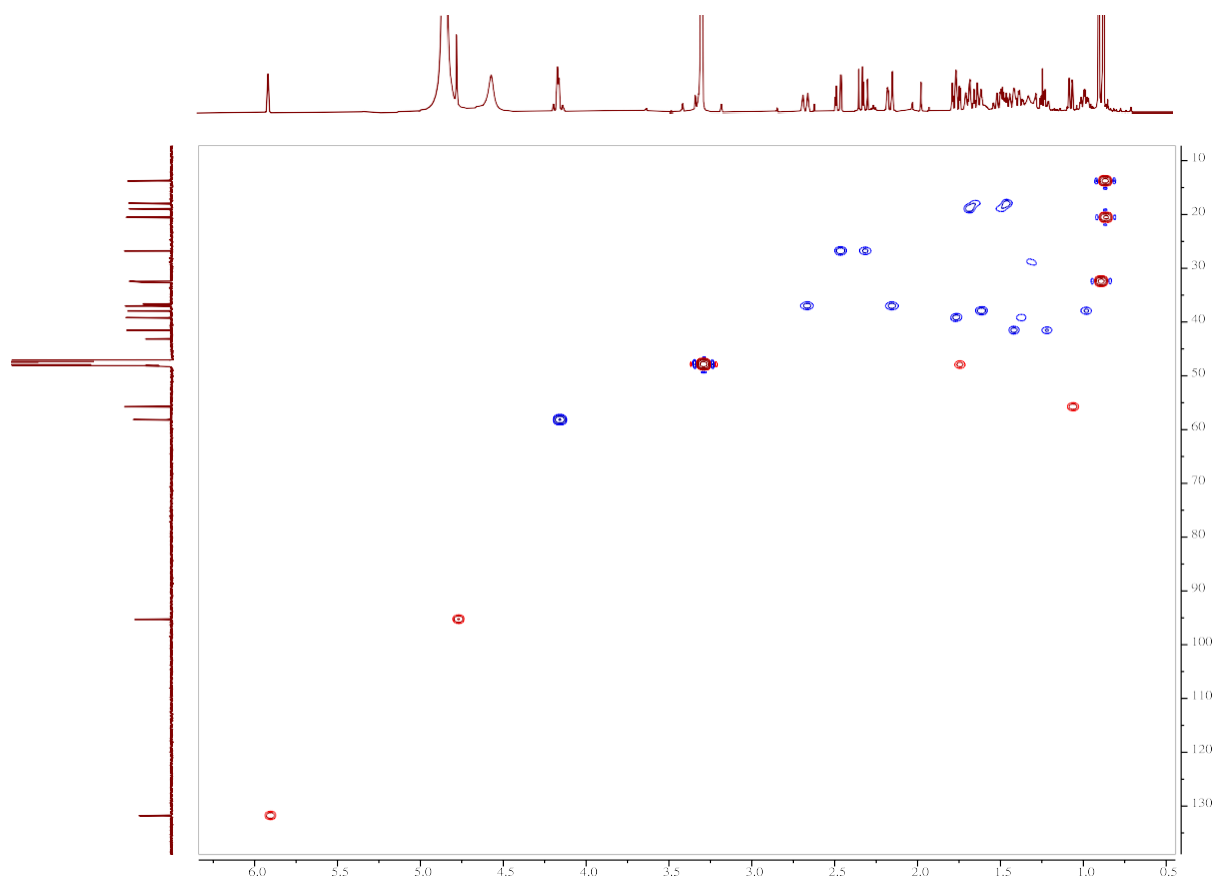

**Figure S73.** HSQC spectrum of mesonol K (**11**)

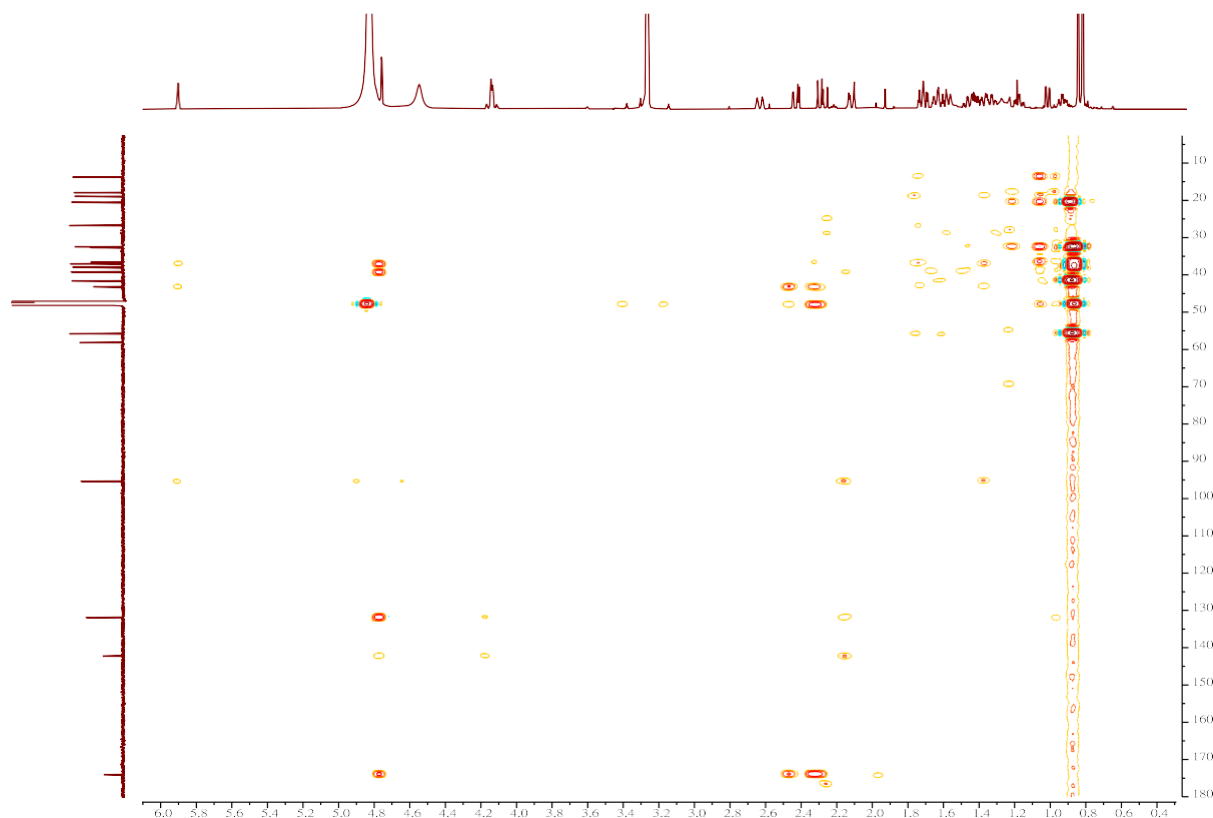

**Figure S74.** HMBC spectrum of mesonol K (**11**)

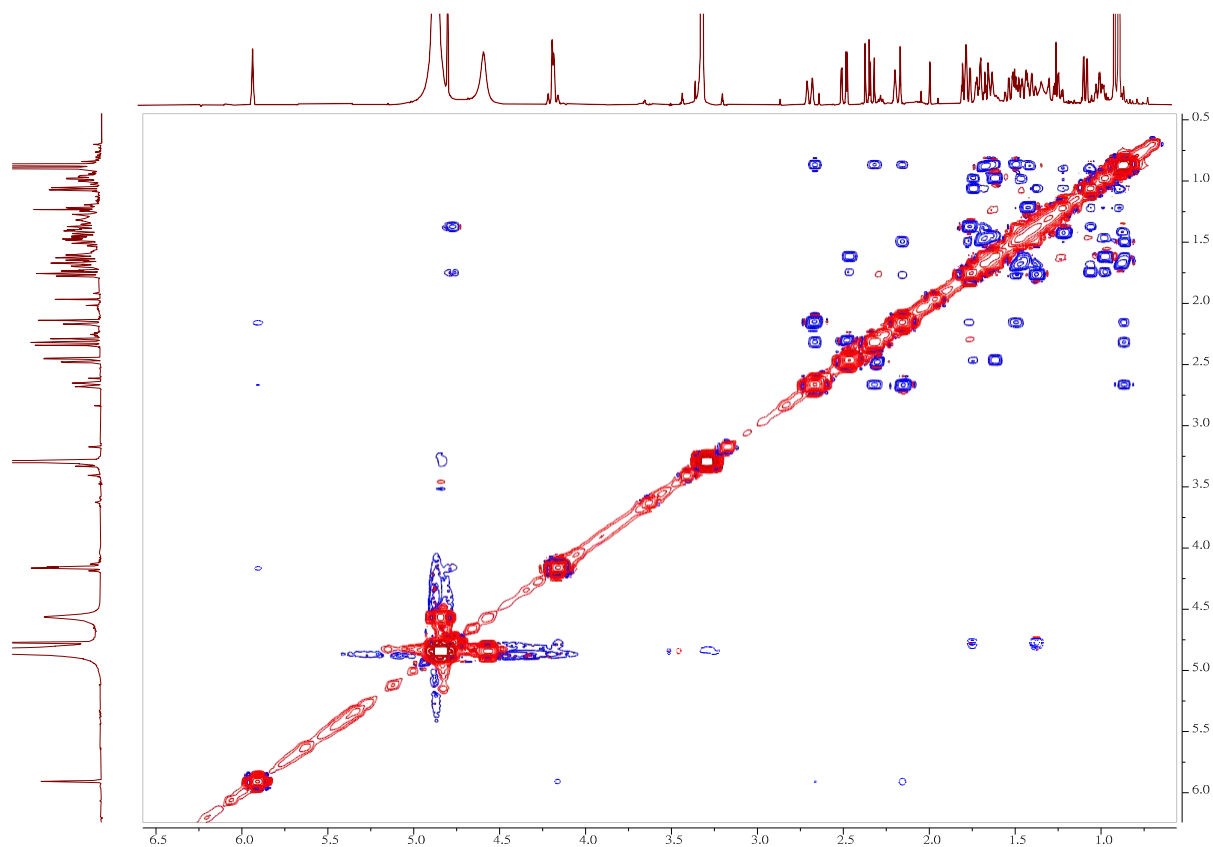

**Figure S75.** NOESY spectrum of mesonol K (**11**)

PPD19542\_200922104554 #145 RT: 1.38 AV: 1 NL: 2.19E8  
T: FTMS + p ESI Full ms [50.0000-750.0000]

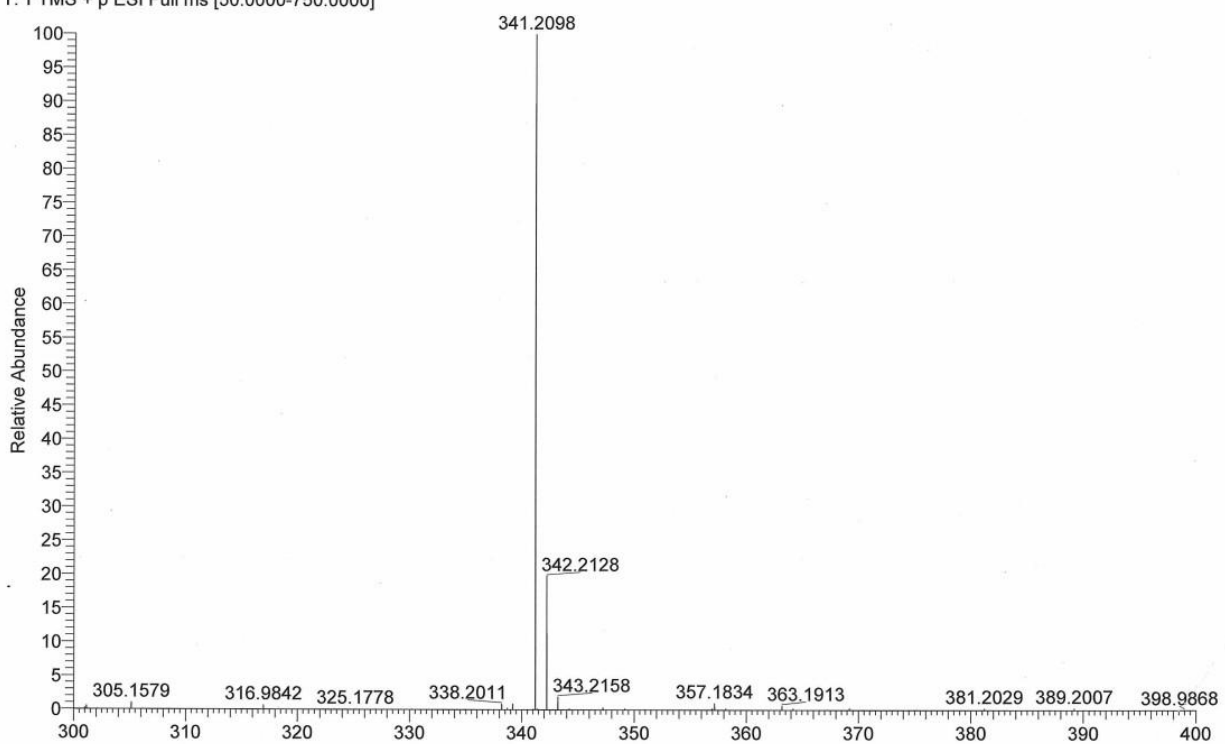

**Figure S76.** (+)-HRESIMS spectrum of mesonol K (**11**)



## Supplementary tables

**Table S1.** Crystal data and structure refinement for **1** (d23335a, CCDC number: 2088866).

|                                   |                                                |                 |
|-----------------------------------|------------------------------------------------|-----------------|
| Identification code               | d23335a                                        |                 |
| Empirical formula                 | C <sub>20</sub> H <sub>32</sub> O <sub>4</sub> |                 |
| Formula weight                    | 336.46                                         |                 |
| Temperature                       | 200(2) K                                       |                 |
| Wavelength                        | 1.54178 Å                                      |                 |
| Crystal system                    | Monoclinic                                     |                 |
| Space group                       | C 2                                            |                 |
| Unit cell dimensions              | a = 12.9593(6) Å                               | α = 90°.        |
|                                   | b = 6.5034(3) Å                                | β = 90.718(2)°. |
|                                   | c = 21.1991(10) Å                              | γ = 90°.        |
| Volume                            | 1786.51(14) Å <sup>3</sup>                     |                 |
| Z                                 | 4                                              |                 |
| Density (calculated)              | 1.251 Mg/m <sup>3</sup>                        |                 |
| Absorption coefficient            | 0.680 mm <sup>-1</sup>                         |                 |
| F(000)                            | 736                                            |                 |
| Crystal size                      | 0.38 x 0.24 x 0.02 mm <sup>3</sup>             |                 |
| Theta range for data collection   | 4.17 to 66.71°.                                |                 |
| Index ranges                      | -15 ≤ h ≤ 15, -7 ≤ k ≤ 7, -25 ≤ l ≤ 24         |                 |
| Reflections collected             | 13838                                          |                 |
| Independent reflections           | 3092 [R(int) = 0.0680]                         |                 |
| Completeness to theta = 66.71°    | 98.9 %                                         |                 |
| Absorption correction             | multiscan                                      |                 |
| Max. and min. transmission        | 0.9865 and 0.7823                              |                 |
| Refinement method                 | Full-matrix least-squares on F <sup>2</sup>    |                 |
| Data/restraints/parameters        | 3092/4/215                                     |                 |
| Goodness-of-fit on F <sup>2</sup> | 1.075                                          |                 |
| Final R indices [I > 2σ(I)]       | R1 = 0.0822, wR2 = 0.2003                      |                 |
| R indices (all data)              | R1 = 0.0882, wR2 = 0.2127                      |                 |
| Absolute structure parameter      | 0.1(4)                                         |                 |
| Largest diff. peak and hole       | 0.386 and -0.432 e.Å <sup>-3</sup>             |                 |

**Table S2.** Crystal data and structure refinement for **2** (d22559, CCDC number: 2088867).

|                                   |                                                |                  |
|-----------------------------------|------------------------------------------------|------------------|
| Identification code               | d22559                                         |                  |
| Empirical formula                 | C <sub>20</sub> H <sub>32</sub> O <sub>3</sub> |                  |
| Formula weight                    | 320.46                                         |                  |
| Temperature                       | 200(2) K                                       |                  |
| Wavelength                        | 0.71073 Å                                      |                  |
| Crystal system                    | Monoclinic                                     |                  |
| Space group                       | C 2                                            |                  |
| Unit cell dimensions              | a = 42.054(9) Å                                | α = 90°.         |
|                                   | b = 6.9024(13) Å                               | β = 105.372(5)°. |
|                                   | c = 12.722(3) Å                                | γ = 90°.         |
| Volume                            | 3560.7(12) Å <sup>3</sup>                      |                  |
| Z                                 | 8                                              |                  |
| Density (calculated)              | 1.196 Mg/m <sup>3</sup>                        |                  |
| Absorption coefficient            | 0.078 mm <sup>-1</sup>                         |                  |
| F(000)                            | 1408                                           |                  |
| Crystal size                      | 0.70 x 0.02 x 0.01 mm <sup>3</sup>             |                  |
| Theta range for data collection   | 2.24 to 25.04°.                                |                  |
| Index ranges                      | -50 ≤ h ≤ 50, -8 ≤ k ≤ 8, -15 ≤ l ≤ 15         |                  |
| Reflections collected             | 34474                                          |                  |
| Independent reflections           | 6269 [R(int) = 0.1615]                         |                  |
| Completeness to theta = 25.04°    | 99.6 %                                         |                  |
| Absorption correction             | multiscan                                      |                  |
| Max. and min. transmission        | 0.9992 and 0.9474                              |                  |
| Refinement method                 | Full-matrix least-squares on F <sup>2</sup>    |                  |
| Data/restraints/parameters        | 6269/1/415                                     |                  |
| Goodness-of-fit on F <sup>2</sup> | 1.050                                          |                  |
| Final R indices [I > 2σ(I)]       | R1 = 0.0635, wR2 = 0.1160                      |                  |
| R indices (all data)              | R1 = 0.1863, wR2 = 0.1599                      |                  |
| Absolute structure parameter      | -1.6(19)                                       |                  |
| Largest diff. peak and hole       | 0.241 and -0.265 e.Å <sup>-3</sup>             |                  |

**Table S3.** Crystal data and structure refinement for **3** (d22583, CCDC number: 2088868).

|                                   |                                                |                 |
|-----------------------------------|------------------------------------------------|-----------------|
| Identification code               | d22583                                         |                 |
| Empirical formula                 | C <sub>20</sub> H <sub>34</sub> O <sub>4</sub> |                 |
| Formula weight                    | 338.47                                         |                 |
| Temperature                       | 200(2) K                                       |                 |
| Wavelength                        | 0.71073 Å                                      |                 |
| Crystal system                    | Monoclinic                                     |                 |
| Space group                       | C 2                                            |                 |
| Unit cell dimensions              | a = 11.599(11) Å                               | α = 90°.        |
|                                   | b = 7.391(7) Å                                 | β = 101.71(3)°. |
|                                   | c = 21.59(2) Å                                 | γ = 90°.        |
| Volume                            | 1812(3) Å <sup>3</sup>                         |                 |
| Z                                 | 4                                              |                 |
| Density (calculated)              | 1.241 Mg/m <sup>3</sup>                        |                 |
| Absorption coefficient            | 0.084 mm <sup>-1</sup>                         |                 |
| F(000)                            | 744                                            |                 |
| Crystal size                      | 0.11 x 0.10 x 0.01 mm <sup>3</sup>             |                 |
| Theta range for data collection   | 2.89 to 25.05°.                                |                 |
| Index ranges                      | -12 ≤ h ≤ 13, -8 ≤ k ≤ 8, -25 ≤ l ≤ 25         |                 |
| Reflections collected             | 10913                                          |                 |
| Independent reflections           | 3171 [R(int) = 0.0599]                         |                 |
| Completeness to theta = 25.05°    | 99.0 % Absorption correction                   | multiscan       |
| Max. and min. transmission        | 0.9992 and 0.9908                              |                 |
| Refinement method                 | Full-matrix least-squares on F <sup>2</sup>    |                 |
| Data/restraints/parameters        | 3171/3/218                                     |                 |
| Goodness-of-fit on F <sup>2</sup> | 1.073                                          |                 |
| Final R indices [I > 2σ(I)]       | R1 = 0.0975, wR2 = 0.2424                      |                 |
| R indices (all data)              | R1 = 0.1334, wR2 = 0.2670                      |                 |
| Absolute structure parameter      | -1(4)                                          |                 |
| Largest diff. peak and hole       | 0.570 and -0.384 e.Å <sup>-3</sup>             |                 |

**Table S4** Crystal data and structure refinement for **7** (d22561, CCDC number: 2088869).

|                                   |                                                |                 |
|-----------------------------------|------------------------------------------------|-----------------|
| Identification code               | d22561                                         |                 |
| Empirical formula                 | C <sub>40</sub> H <sub>67</sub> O <sub>9</sub> |                 |
| Formula weight                    | 691.94                                         |                 |
| Temperature                       | 200(2) K                                       |                 |
| Wavelength                        | 0.71073 Å                                      |                 |
| Crystal system                    | Monoclinic                                     |                 |
| Space group                       | P 21                                           |                 |
| Unit cell dimensions              | a = 7.3577(8) Å                                | α = 90°.        |
|                                   | b = 11.1296(9) Å                               | β = 95.745(3)°. |
|                                   | c = 22.919(2) Å                                | γ = 90°.        |
| Volume                            | 1867.4(3) Å <sup>3</sup>                       |                 |
| Z                                 | 2                                              |                 |
| Density (calculated)              | 1.231 Mg/m <sup>3</sup>                        |                 |
| Absorption coefficient            | 0.085 mm <sup>-1</sup>                         |                 |
| F(000)                            | 758                                            |                 |
| Crystal size                      | 0.74 x 0.39 x 0.02 mm <sup>3</sup>             |                 |
| Theta range for data collection   | 2.04 to 25.08°.                                |                 |
| Index ranges                      | -8 ≤ h ≤ 8, -12 ≤ k ≤ 13, -24 ≤ l ≤ 27         |                 |
| Reflections collected             | 27861                                          |                 |
| Independent reflections           | 6563 [R(int) = 0.0968]                         |                 |
| Completeness to theta = 25.08°    | 99.7 %                                         |                 |
| Absorption correction             | multiscan                                      |                 |
| Max. and min. transmission        | 0.9983 and 0.9397                              |                 |
| Refinement method                 | Full-matrix least-squares on F <sup>2</sup>    |                 |
| Data/restraints/parameters        | 6563/1/452                                     |                 |
| Goodness-of-fit on F <sup>2</sup> | 1.025                                          |                 |
| Final R indices [I > 2σ(I)]       | R1 = 0.0732, wR2 = 0.1893                      |                 |
| R indices (all data)              | R1 = 0.0922, wR2 = 0.2076                      |                 |
| Absolute structure parameter      | 0.1(13)                                        |                 |
| Largest diff. peak and hole       | 0.502 and -0.389 e.Å <sup>-3</sup>             |                 |
